# Supplementary material
Source: publisher figshare collection journal article supplement (https://acs.figshare.com/ndownloader/files/4091494)
Supplement: Supplementary file 1 [file 4091494]

## Supplementary Information

### **Spiroketal Formation and Modification in Avermectin Biosynthesis Involves a Dual Activity of AveC**

Peng Sun,<sup>†,‡</sup> Qunfei Zhao,<sup>†</sup> Futao Yu,<sup>†</sup> Hua Zhang,<sup>†</sup> Zhuhua Wu,<sup>†</sup> Yinyan Wang,<sup>†</sup> Yan Wang,<sup>†</sup> Qinglin Zhang<sup>†</sup>, and Wen Liu<sup>†,\*</sup>

<sup>†</sup> State Key Laboratory of Bioorganic and Natural Products Chemistry, Shanghai Institute of Organic Chemistry, Chinese Academy of Sciences, 345 Lingling Road, Shanghai 200032, China;

<sup>‡</sup> Research Center for Marine Drugs, School of Pharmacy, Second Military Medical University, 325 Guo-He Road, Shanghai, 200433, China.

\* To whom correspondence should be addressed: Shanghai Institute of Organic Chemistry, Chinese Academy of Sciences, 345 Lingling Rd., Shanghai 200032, China. Wen Liu, Email: [wliu@mail.sioc.ac.cn](mailto:wliu@mail.sioc.ac.cn), Tel: 86-21-54925111, Fax: 86-21-64166128

## Table of Contents

### 1. Supplementary Methods

- 1.1 General Materials and Methods
- 1.2 Gene Inactivation and Complementation
- 1.3 Compound Isolation and Derivatization

### 2. Supplementary Results

### 3. Supplementary Tables

- Table S1. Bacterial Strains and Plasmids
- Table S2. Primers used in this study
- Table S3.  $^1\text{H}$  and  $^{13}\text{C}$  NMR spectroscopic data for **1** and **1'**
- Table S4.  $^1\text{H}$  and  $^{13}\text{C}$  NMR spectroscopic data for **2** and **2'**
- Table S5.  $^1\text{H}$  and  $^{13}\text{C}$  NMR spectroscopic data for **4** and **4'** in acetone- $d_6$
- Table S6.  $^{13}\text{C}$  NMR spectroscopic data for **4** and **4'** in methanol- $d_4$
- Table S7.  $^1\text{H}$  and  $^{13}\text{C}$  NMR spectroscopic data for **5**
- Table S8.  $^1\text{H}$  and  $^{13}\text{C}$  NMR spectroscopic data for **6** and **6'**
- Table S9.  $^1\text{H}$  and  $^{13}\text{C}$  NMR spectroscopic data for **7** and **7'**
- Table S10.  $^1\text{H}$  and  $^{13}\text{C}$  NMR spectroscopic data for **8**

### 4. Supplementary Figures

- Fig. S1 Alignment of the amino acid sequences of AveC, MilC, MeiC, and NemC
- Fig. S2 Spontaneous conversions of the unstable products **2**, **2'**, **3**, and **7** and **7'**
- Fig. S3 SDS-PAGE analysis of the proteins in the recombinant *E. coli* strain VL2001
- Fig. S4 Time course analysis of MBP-MeiC-catalyzed biotransformation *in vitro*
- Fig. S5 Construction of *S. avermectinius* mutant strains, and their genotypes verification
- Fig. S6 NMR spectra of compound **1**
- Fig. S7 NMR spectra of compound **1'**

|           |                                                 |
|-----------|-------------------------------------------------|
| Fig. S8   | NMR spectra of compounds <b>2</b> and <b>2'</b> |
| Fig. S9   | NMR spectra of compound <b>4</b>                |
| Fig. S10  | NMR spectra of compound <b>4'</b>               |
| Fig. S11. | NMR spectra of compound <b>5</b>                |
| Fig. S12  | NMR spectra of compound <b>6</b>                |
| Fig. S13  | NMR spectra of compound <b>6'</b>               |
| Fig. S14  | NMR spectra of compound <b>7</b>                |
| Fig. S15  | NMR spectra of compound <b>7'</b>               |
| Fig. S16  | NMR spectra of compound <b>8</b>                |
| Fig. S17  | Acid treatment of <b>1</b> and <b>1'</b>        |

## **5            Supplementary References**

## 1. Supplementary Methods

### 1.1. General Materials and Methods

HPLC analysis was carried out on Agilent 1200 HPLC system (Agilent Technologies Inc., USA) with a Zorbax SB-C18 column (4.6 mm × 25 cm, 5 μm). Semipreparative HPLC was carried out on an Agilent 1100 system with a Zorbax SB-C18 column (9.4 mm × 25 cm, 5 μm). Preparative HPLC was carried out on an Agilent 1100 system with a Zorbax SB-C18 column (21.2 × 25 cm, 7 μm). Optical rotations were measured on an Autopol-IV polarimeter at the sodium D line (590 nm). UV absorption spectra were recorded on a Varian Cary 100 UV–vis spectrophotometer. NMR analysis was carried out on a Bruker AV-400, a Bruker AV-500 (Bruker Co. Ltd., Germany), or a Varian Unity Inova 600 (Varian Inc., USA) NMR spectrometer. Chemical shifts were reported in parts per million ( $\delta$ ); coupling constants ( $J$ ) in Hz; assignments were supported by COSY, HSQC, HMBC, and NOESY experiments. Electrospray ionization MS (ESIMS) was performed on a Thermo Fisher LTQ Fleet ESIMS spectrometer (Thermo Fisher Scientific Inc., USA). High resolution ESIMS (HR-ESIMS) analysis was carried out on a Bruker APEXIII 7.0 Tesla FT-MS system (Bruker Co. Ltd., Germany). X-ray crystallographic analysis was carried out on a Bruker APEXII CCD diffractometer with Cu K $\alpha$  radiation ( $\lambda = 1.54178 \text{ \AA}$ ).

### 1.2. Gene Inactivation and Complementation

**Inactivation of *aveD*.** The genomic DNA of the *S. avermectinius* wild type strain serves as the template for PCR amplification. A 2.0 kb fragment obtained by using the primers aveD-L-for and aveD-L-rev and a 1.8 kb fragment obtained by using the primers aveD-R-for and aveD-R-rev were initially cloned into pMD19-T, giving pVL1001 and pVL1002, respectively. After sequencing to confirm the fidelity, the 2.0 kb EcoRI/HindIII and 1.8 kb HindIII/XbaI fragments were recovered and then co-ligated into the EcoRI/XbaI site of pKC1139, yielding the recombinant plasmid pVL1003, which encodes a G79L mutation for replacing the conserved motif DxGxGxG (of various methyltransferases) by DxGxGxL and a S78K mutation for introducing a HindIII site. Introduction of pVL1003 into the AVE-producing strain *S. avermectinius* was carried out by *E.coli-Streptomyces*

conjugation, following the procedure described previously.<sup>1</sup> The colonies that were apramycin-resistant at 37°C were identified as the integrating mutants, in which a single-crossover homologous recombination event took place. These mutants were further cultured on MS plates for several rounds in the absence of apramycin. The resulting strains that were apramycin-sensitive were subjected to PCR amplification (using the primers aveD-gt-for and aveD-gt-rev) to give a 2.0 kb product. HindIII digestion was then carried out on this PCR product to determine the genotype. For the recombinant strain VL1001, in which *aveD* was site-specific inactivated, HindIII digestion yielded the 0.6 kb and 1.4 kb fragments (Figure S7a).

***Inactivation of aveC and aveCE, respectively, in VL1001.*** Considering that *aveC* is closely linked with *aveE* in the gene cluster (Figure 1), we carried out a two-step strategy to in-frame delete *aveC* in the *aveD* mutant strain VL1001.

To make the  $\Delta$ *aveCDE* triple mutant strain, the genomic DNA of the *S. avermectinius* wild type strain serves as the template for PCR amplification. A 1.9 kb fragment obtained by using the primers aveCE-L-for and aveCE-L-rev and a 2.1 kb fragment obtained by using the primers aveCE-R-for and aveCE-R-rev were initially cloned into pMD19-T, giving pVL1004 and pVL1005, respectively. After sequencing to confirm the fidelity, the 1.9 kb EcoRI/PstI and 2.1 kb BglII/XbaI fragments were recovered, and then co-ligated with a 1.8 kb PstI/BglII erythromycin resistant gene-containing fragment into the EcoRI/XbaI site of pKC1139, yielding the recombinant plasmid pVL1006. Following the procedure described above, pVL1006 was introduced into VL1001 for double crossover recombination. The resulting strain VL1004, which is apramycin-sensitive but erythromycin-resistant, was then subjected to PCR amplification to validate the genotype. The amplification by using the primers aveCE-gt-for and aveCE-gt-rev yielded a desired 1.9 kb product (figure S7b). Further sequencing of this PCR product confirmed the genotype of VL1004, in which both *aveC* and *aveE* were replaced by the erythromycin resistant gene.

To make the  $\Delta$ *aveCD* double mutant strain, a 1.9 kb fragment obtained from the genomic DNA of the wild type strain by using the primers aveC-R-for and aveC-R-rev was cloned into pMD19-T to yield pVL1007. The 1.9 kb EcoRI/PstI fragment from pVL1004 and the 1.9 kb PstI/XbaI fragment from pVL1007 were ligated into the EcoRI/XbaI sites of pKC1139 to yield pVL1008, in which a

756 bp in-frame coding region of *aveC* was deleted. Following the procedure described above, pVL1008 was introduced into VL1004 for double crossover recombination. The resulting strain VL1002, which is apramycin and erythromycin-sensitive, was then subjected to PCR amplification to validate the genotype. The amplification by using the primers aveCE-gt-for and aveCE-gt-rev yielded a desired 0.4 kb product (figure S7c). Further sequencing of this PCR product confirmed the genotype of VL1002, in which *aveC* was in-frame deleted.

***Heterologous expression of meiC in VL1002.*** A 1.7 kb *meiC*-containing fragment was amplified from the genomic DNA of the MEI-producing strain *S. nanchangensis* by PCR using the primers meiC-c-for and meiC-c-rev, and then cloned into pMD19-T to yield pVL1009. After digestion with BamHI and XbaI, this 1.7 kb PCR product was recovered from pVL1009 and subsequently ligated with a 0.45 kb EcoRI/BamHII fragment from pWHM79 into the EcoRI/XbaI site of pSET152, yielding the recombinant plasmid pVL1010, in which *meiC* is under the control of the constitutive promoter *PerME\**. pVL1010 was introduced into VL1002 (*aveCD* double mutant) by conjugation, generating the corresponding recombinant strain VL1003 for *meiC*-expressing.

***Site-specific mutation of aveA1-M2-DH.*** The genomic DNA of the *S. avermectinius* wild type strain serves as the template for PCR amplification. A 1.1 kb fragment obtained by using the primers DH2-L-for and DH2-L-rev and a 1.1 kb fragment obtained by using the primers DH2-R-for and DH2-R-rev were initially cloned into pMD19-T, giving pVL1013 and pVL1014, respectively. After sequencing to confirm the fidelity, the 1.1 kb HindIII/KpnI fragment from pVL1013 and 1.1 kb KpnI/BamHI fragment from pVL1014 were recovered and then co-ligated into the HindIII/BamHI site of pKC1139, yielding the recombinant plasmid pVL1015, which encodes a H33G mutation for replacing the conserved motif HxxxGxxxxS by GxxxGxxxxS and has a mutation for replacing GGC ACG (encoding G37 and T38) to GGT ACC (without coding change) for introducing a KpnI site. Following the procedure described above, pVL1015 was introduced into the wild type strain for double crossover recombination. The resulting strains that were apramycin-sensitive were subjected to PCR amplification (using the primers DH2-gt-for and DH2-gt-rev) to give a 0.9 kb product. KpnI digestion was then carried out on this PCR product to determine the genotype. For the recombinant

strain VL1005, in which *aveA1-M2-DH* was site-specific inactivated, KpnI digestion yielded the 0.5 kb and 0.4 kb fragments (Figure S7d). This mutation was further confirmed by sequencing of the 0.9 kb PCR product.

**Complementation of *aveC* in VL1002.** A 1.2 kb *aveC*-containing fragment was amplified from the genomic DNA of the AVE-producing strain *S. avermectinius* by PCR using the primers *aveC*-c-for and *aveC*-c-rev, and then cloned into pMD19-T to yield pVL1011. After digestion with BamHI and XbaI, this 1.2 kb PCR product was recovered from pVL1011 and subsequently ligated with a 0.45 kb EcoRI/BamHII fragment from pWHM79 into the EcoRI/XbaI site of pSET152, yielding the recombinant plasmid pVL1012, in which *aveC* is under the control of the constitutive promoter *PerME\**. pVL1012 was introduced into VL1002 (*aveCD* double mutant) by conjugation, generating the corresponding recombinant strain VL1006 for *aveC*-expressing.

**Inactivation of *aveE* in VL1001.** The genomic DNA of the *S. avermectinius* wild type strain serves as the template for PCR amplification. A 2.1 kb EcoRI/XbaI fragment obtained by using the primers *aveE*-L-for and *aveE*-L-rev was cloned into pOJ260, yielding pVL1016. A 2.3 kb XbaI/HindIII fragment obtained by using the primers *aveE*-R-for and *aveE*-R-rev was cloned into pVL1016 to give pVL1017. After this, a 1.9 kb XbaI fragment, which encodes the erythromycin resistance gene from *Saccharopolyspora erythraea* NRRL 2338, was amplified by primers *ermE*-S and *ermE*-A, and then inserted into the XbaI site of pVL1017, yielding the recombinant plasmid pVL1018. Following the procedure described above, pVL1018 was introduced into VL1001 for double crossover recombination. The resulting strain VL1008, which is apramycin-sensitive but erythromycin-resistant, was then subjected to PCR amplification to validate the genotype. The amplification by using the primers *aveE*-gt-for and *aveE*-gt-rev yielded a desired 3.0 kb product (Figure S7e). Further sequencing of this PCR product confirmed the genotype of VL1008, in which *aveE* was replaced by the erythromycin resistant gene.

### 1.3. Compound Isolation and Derivatization

### 1.3.1. Compound characterization in the *ΔaveDC* double mutant strain VL1002

**Isolation of 1 and 1'.** Fr. 24 was fractionated by silica gel CC (petroleum ether/EtOAc, 70:30), and subsequently by semipreparative HPLC (75% MeOH/H<sub>2</sub>O, 3.0 mL min<sup>-1</sup>) to afford compound **1** (260.3 mg, *t<sub>R</sub>* = 17.2 min). Fr. 11 was fractionated by silica gel CC (petroleum ether/EtOAc, 85:15), and subsequently by semipreparative HPLC (80% MeOH/H<sub>2</sub>O, 3.0 mL min<sup>-1</sup>) to give compound **1'** (100.1 mg, *t<sub>R</sub>* = 20.4 min).

**Isolation of 2 and 2' (with a ratio at around 2 : 1).** Fr. 26 (3.5 g) contained compounds **2**, which was unstable and easily converted into **2'** and into **1** and **1'** during the purification by silica gel CC, Sephadex LH-20 or semipreparative HPLC. A small amount of metabolites (4.9 mg) containing **2** and **2'** (around 2 : 1) was eventually purified by preparative HPLC eluting with 75% MeOH/H<sub>2</sub>O at a flow rate of 18.0 mL min<sup>-1</sup>. To slow down the degradation, the purification and evaporation were carried out rapidly at < 20 °C. The NMR spectra of **2** and **2'** were recorded by a Bruker Avance 500 spectrometer with a cryogenic probe.

**Derivatization of 2 and 2' to generate 4 and 4'.** Fr. 26 (100.0 mg) was dissolved in a solution of anhydrous CH<sub>2</sub>Cl<sub>2</sub> (7 mL) and MeOH (7 mL) at -80 °C under nitrogen atmosphere and then stirred. NaBH<sub>4</sub> (0.05 g) was added slowly to the solution. The resulting mixture was stirred vigorously for additional 30 min and warmed to room temperature. The reaction mixture was cooled to 0 °C with ice water and then quenched by adding dropwise saturated NH<sub>4</sub>Cl aqueous solution. The biphasic system was extracted with EtOAc (2 × 20 mL). The combined organic layers were washed with H<sub>2</sub>O (10 mL) and then dried by evaporation in vacuum to give the crude product. Further purification of the resulting product was accomplished by semipreparative HPLC eluting with a flow rate of 2.0 mL min<sup>-1</sup> gradient as follows: T = 0 min, 80% B; T = 10 min, 80% B; T = 15 min, 85% B; T = 20 min, 100% B; T = 27 min, 100% B, and T = 30 min, 65% B (phase A, H<sub>2</sub>O; phase B, MeOH). Two compounds with the same molecular weight of 588, **4** (26.1 mg, *t<sub>R</sub>* = 10.2 min) and **4'** (7.0 mg, *t<sub>R</sub>* = 12.3 min), were obtained.



**Derivatization of 2 and 2' to generate 5.** Methylation of Fr. 26 containing compound **2** was carried out according to a method described previously.<sup>2</sup> To a stirred solution of Fr. 26 (100 mg) and 1,8-bis(dimethylamino)naphthalene (proton sponge, 0.5 g, 0.230 mmol) in anhydrous CH<sub>2</sub>Cl<sub>2</sub> (10 mL) at room temperature under nitrogen atmosphere was added methyl triflate (MeOTf, 208  $\mu$ L, 0.32 g, 0.192 mmol). The resulting mixture was stirred for 24 h and then the suspension was treated with concentrated NH<sub>4</sub>OH (2 mL) before stirred for 30 min. The biphasic mixture was diluted with CH<sub>2</sub>Cl<sub>2</sub> (10 mL) and H<sub>2</sub>O (5 mL) and the layers were shaken well before separation. The aqueous phase was extracted with CH<sub>2</sub>Cl<sub>2</sub> (2  $\times$  10 mL) and the combined organic extracts were washed with H<sub>2</sub>O (20 mL). The organic phase was dried (Na<sub>2</sub>SO<sub>4</sub>) and concentrated in vacuum. The resulting crude residue was fractionated by silica gel CC eluting with 25% EtOAc in petroleum ether to yield 7 sub-fractions. LC-MS analysis indicated that sub-fraction 4 contained the methylated adducts. Further purification was accomplished by semipreparative HPLC eluting with 90% MeOH/H<sub>2</sub>O at a flow rate of 2.5 mL $\cdot$ min<sup>-1</sup> to give compound **5** (5.3 mg,  $t_R$ =13.5 min).

**Partial purification of 3 and 3'.** Fr. 26 contained the minor and unstable compound **3**, which can be rapidly converted to **3'**, and after longer incubation into the major pair **2** and **2'** and the minor pair **7** and **7'**, and then into **1** and **1'**. Partial purification of **3** and **3'** were achieved by semipreparative HPLC eluting with 65% CH<sub>3</sub>CN/H<sub>2</sub>O (10  $^{\circ}$ C, 2.5 mL $\cdot$ min<sup>-1</sup>). The fraction containing **3** and **3'** was used for HR-ESIMS analysis and for *in vitro* biotransformations.

**Derivatization of 3 and 3' to generate 6 and 6'.** Selective oximation of the carbonyls of **3** and **3'** was carried out according to a method described previously.<sup>3</sup> A solution of NH<sub>2</sub>OH $\cdot$ HCl in water (20 mL, 0.2 mM, neutralized by saturated sodium carbonate to reach pH at 7.0) was added dropwise to a methanol solution of Fr. 26 (150 mg in 10 mL). The mixture was stirred at room temperature for 30 min and then concentrated under reduced pressure. The residue was extracted with EtOAc (2  $\times$  20 mL) and the combined organic phase was washed with H<sub>2</sub>O (10 mL), dried (Na<sub>2</sub>SO<sub>4</sub>), and concentrated in vacuum. The resulting product was analyzed by HPLC-MS to target the peaks with MWs of 634, which were supposed to be *di*-oxime derivatives of unstable intermediates **3** and **3'**. Further purification was achieved by preparative HPLC eluting with 70% MeOH-H<sub>2</sub>O at a flow rate

of 15.0 mL min<sup>-1</sup> to give sub-fractions 1-5. Sub-fraction 3 was further purified by semipreparative HPLC eluting with 45% CH<sub>3</sub>CN/H<sub>2</sub>O at a flow rate of 3.0 mL·min<sup>-1</sup> to give compound **6** (6.7 mg, *t<sub>R</sub>* = 9.9 min). Sub-fraction 5 was subjected to semipreparative HPLC eluting with 40% CH<sub>3</sub>CN/H<sub>2</sub>O at a flow rate of 3.0 mL·min<sup>-1</sup> to give compound **6'** (4.4 mg, *t<sub>R</sub>* = 10.2 min).

**Isolation of 7 and 7'.** Fr. 19 was fractionated by preparative HPLC eluting with 80% MeOH/H<sub>2</sub>O at a flow rate of 15.0 mL min<sup>-1</sup> to afford 8 sub-fractions. Sub-fraction 3 was further purified by semipreparative HPLC with 85% MeOH/H<sub>2</sub>O at a flow rate of 2.0 mL min<sup>-1</sup> to yield compound **7** (19.0 mg, *t<sub>R</sub>* = 12.3 min). Fr. 13 was fractionated by preparative HPLC eluting with 85% MeOH/H<sub>2</sub>O at a flow rate of 15.0 mL min<sup>-1</sup> to afford 5 sub-fractions. Sub-fraction 4 was further purified by semipreparative HPLC with 90% MeOH/H<sub>2</sub>O at a flow rate of 2.5 mL min<sup>-1</sup> to yield compound **7'** (6.5 mg, *t<sub>R</sub>* = 10.9 min).

### 1.3.2. Compound characterization in the *ΔaveDE* double mutant strain VL1008

**Isolation of compound 8.** VL1008 was cultivated to accumulate about 4 L of the fermentation broth, which was then centrifuged for 30 min at 4,000 rpm to collect the mycelia. The mycelia were extracted with acetone (1 L × 3 times) and the combined acetone extracts were evaporated under reduced pressure to afford the crude extract (1.2 g). The crude extracts were subjected to the separation by a silica gel CC, with a gradient elution of EtOAc in petroleum ether (0:100 → 100:0, v/v), to give 12 fractions. Fraction 4 was further purified by semipreparative HPLC (90% MeOH/H<sub>2</sub>O, 2.5 mL min<sup>-1</sup>) to afford compound **8** (6.3 mg, *t<sub>R</sub>*=10.9 min).

## 2. Supplementary Results

### 2.1. Physico-Chemical Properties and Structural Elucidations of 1 and 1'.

**Compound 1.** white amorphous powder; [ $\alpha$ ]<sub>D</sub><sup>23</sup> +80.5 (*c* 0.84, MeOH); UV (MeOH)  $\lambda_{\text{max}}$  (log  $\epsilon$ ) 247 nm (4.61); <sup>1</sup>H and <sup>13</sup>C NMR (400 and 100 MHz, respectively, acetone-*d*<sub>6</sub>) see Table S3; ESIMS

$m/z$  591  $[M + Na]^+$ ,  $m/z$  1159  $[2M + Na]^+$ , HRESIMS  $m/z$  591.3279  $[M + Na]^+$  (calcd for  $[C_{34}H_{48}NaO_7]^+$ , 591.3292).

**Compound 1'**. white amorphorous powder;  $[\alpha]_D^{25} +124.3$  ( $c$  0.60, MeOH); UV (MeOH)  $\lambda_{max}$  (log  $\epsilon$ ) 246 nm (4.51);  $^1H$  and  $^{13}C$  NMR (400 and 100 MHz, respectively, acetone- $d_6$ ) see Table S3; ESIMS  $m/z$  591  $[M + Na]^+$ ,  $m/z$  1159  $[2M + Na]^+$ , HRESIMS  $m/z$  591.3279  $[M + Na]^+$  (calcd for  $[C_{34}H_{48}NaO_7]^+$ , 591.3292).

**Structural elucidation of 1 and 1'**. Compounds **1** and **1'** were shown with the same molecular weight of 568 and their formulae were determined equally to be  $C_{34}H_{48}O_7$  by HRESIMS. The  $^{13}C$  NMR and DEPT spectra of **1** revealed seven methyl groups, five methylene groups, fourteen methine groups, and eight quaternary carbons. The presence of five oxygenated carbons ( $\delta_C$  79.4, 74.7, 70.5, 69.4, 69.1 ppm, CH) indicates the loss of sugar moieties of natural AVEs. In the  $^{13}C$  NMR spectrum of **1**, the absence of the oxymethine carbon at C-6 and oxymethylene carbon at C-8a indicates the lack of the furan ring from C-6 to C-8a, which was confirmed by HMBC cross peaks between H<sub>3</sub>-8Me and C-7, C-8, and C-9. Instead, the NMR signals at lower field of  $^1H$  and  $^{13}C$  spectra ( $\delta_C$  158.0, 144.7, 132.6, 123.9, 123.8, 114.7 ppm;  $\delta_H$  7.25, 6.69 ppm) suggests the presence of a *tetra*-substituted aromatic ring, which was further conformed by the HMBC correlations between H<sub>3</sub>-4Me and C-3, C-4, and C-5. The planar structure of **1** was elucidated by detailed analysis of the 1D and 2D NMR spectra ( $^1H$ ,  $^{13}C$ , DEPT, HSQC, COSY, and HMBC) of **1** and by comparison with its  $^1H$  and  $^{13}C$  chemical shifts of the aglycone moiety of natural AVEs (Table S3).<sup>4</sup> In a similar way, the planar structure of **1'** was established (Table S3). **1** and **1'** were shown with the same planar structures. **1'** was further determined to be the 6,8a-seco-6,8a-deoxy-2,5-didehydro AVE-B2a aglycone by  $^1H$  and  $^{13}C$  NMR data comparison,<sup>5</sup> which was previously isolated from the *S. avermectinius* mutant strain K2057 (*AaveDE*, X)<sup>6</sup> and *S. avermectinius* NEAU1069<sup>5</sup>.

The difference of **1** and **1'** is shown in their relative configurations, which can be observed in their NOESY spectra. In the NOESY spectrum of **1**, the NOE effect between H-17 and H-22b and between H-19 and H-22a indicates that the C21-C22 single bond is in an  $\alpha$ -orientation, while the NOE correlation between H-20b and H-25 suggests that the C21-O25 single bond has a  $\beta$ -orientation.

In the NOESY spectrum of **1'**, the obvious NOE effect between H-17 and H-25, H-27, and H<sub>3</sub>-28 indicates that C21-O25 single bond possesses a  $\alpha$ -orientation. The  $\beta$ -orientation of C21-C22 single bond was proved by NOE correlations between H-20b and H-22a, and between H-23 and H-22a. The structures and absolute configurations of the two enantiomers were further confirmed by X-ray crystallographic analysis. Thus, the absolute configurations at the C-21 position of **1** and **1'** were assigned as (*S*) and (*R*), respectively. **1** was assigned as (21*S*)-6,8a-seco-6,8a-deoxy-2,5-didehydro AVE-B2a aglycone.

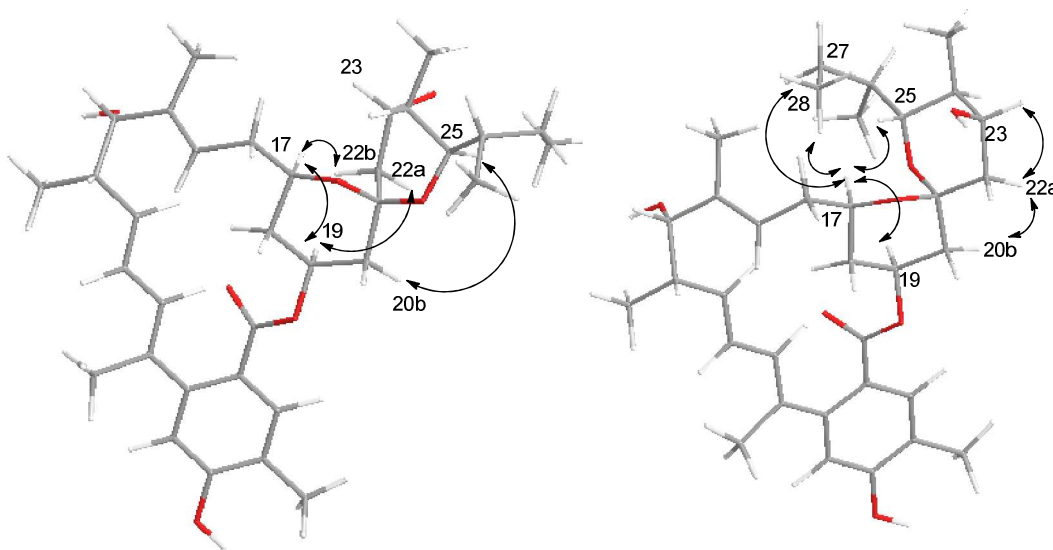

**Key NOESY correlations of **1** (left) and **1'** (right)**

***X-ray crystallographic analysis of **1** and **1'*****. Colorless crystal of **1** was obtained from toluene and hexane. Colorless crystal of **1'** was obtained from MeOH and hexane. The crystal diffraction data was collected at 296 K on a Bruker APEXII CCD diffractometer with Cu K $\alpha$  radiation ( $\lambda=1.54178\text{\AA}$ ). The structures were solved by direct methods (SHELXS-97) and refined using full-matrix least-square difference Fourier techniques. All non-hydrogen atoms were refined anisotropically, and all hydrogen atoms were placed in geometrically idealized position and constrained to ride on their parent atoms.

Crystal data for **1** (CCDC 902276): C<sub>34</sub>H<sub>48</sub>O<sub>7</sub>, *Mr* = 568.72, orthorhombic, space group *P*2<sub>1</sub>2<sub>1</sub>2<sub>1</sub> with *a* = 10.780(2) Å, *b* = 14.083(3) Å, *c* = 22.105(4) Å,  $\alpha=\beta=\gamma=90^\circ$ , *V* = 3356.0(12) Å<sup>3</sup>, *Z* = 4, *D<sub>x</sub>* = 1.126 mg/mm<sup>3</sup>,  $\mu$  (Cu K $\alpha$ ) = 0.622 mm<sup>-1</sup>, and *F*(000) = 1232. Crystal dimensions: 0.10 × 0.18 ×

0.21 mm<sup>3</sup>. Independent reflections: 5837 ( $R_{\text{int}} = 0.0198$ ). The final  $R_1$  values were 0.0333, Flack parameter = 0.00(14),  $wR_2 = 0.0927$  ( $I > 2\sigma(I)$ ).

Crystal data for **1'** (CCDC 902279): C<sub>34</sub>H<sub>48</sub>O<sub>7</sub>·H<sub>2</sub>O,  $M_r = 600.77$ , monoclinic, space group  $P2_1$  with  $a = 12.806(3)$  Å,  $b = 9.263(2)$  Å,  $c = 14.377(3)$  Å,  $\alpha = \gamma = 90^\circ$ ,  $\beta = 93.38(3)^\circ$ ,  $V = 1702.4(6)$  Å<sup>3</sup>,  $Z = 2$ ,  $D_x = 1.172$  mg/mm<sup>3</sup>,  $\mu$  (Cu K $\alpha$ ) = 0.659 mm<sup>-1</sup>, and  $F(000) = 652$ . Crystal dimensions: 0.11 × 0.13 × 0.16 mm<sup>3</sup>. Independent reflections: 5485 ( $R_{\text{int}} = 0.0248$ ). The final  $R_1$  values were 0.0418, Flack parameter = -0.01(17),  $wR_2 = 0.1164$  ( $I > 2\sigma(I)$ ).

## 2.2. Physico-Chemical Properties and Structural Elucidations of **2** and **2'**.

**Compound 2.** white amorphorous powder; <sup>1</sup>H and <sup>13</sup>C NMR (500 and 125 MHz, respectively, acetone-*d*<sub>6</sub>) see Table S4; ESIMS  $m/z$  609 [M + Na]<sup>+</sup>,  $m/z$  1195 [2M + Na]<sup>+</sup>, HRESIMS  $m/z$  609.3387 [M + Na]<sup>+</sup> (calcd for [C<sub>34</sub>H<sub>50</sub>NaO<sub>8</sub>]<sup>+</sup>, 609.3398).

**Compound 2'.** white amorphorous powder; <sup>1</sup>H and <sup>13</sup>C NMR (500 and 125 MHz, respectively, acetone-*d*<sub>6</sub>) see Table S4; ESIMS  $m/z$  609 [M + Na]<sup>+</sup>,  $m/z$  1195 [2M + Na]<sup>+</sup>, HRESIMS  $m/z$  609.3389 [M + Na]<sup>+</sup> (calcd for [C<sub>34</sub>H<sub>50</sub>NaO<sub>8</sub>]<sup>+</sup>, 609.3398).

**Structural elucidation of **2** and **2'**.** The molecular formula C<sub>34</sub>H<sub>50</sub>O<sub>8</sub> of **2** or **2'** was established by HR-ESIMS at  $m/z$  609.3387 or 609.3389 ([M + Na]<sup>+</sup>), <sup>13</sup>C and DEPT spectra. The structural elucidations of **2** and **2'** were carried out on a mixture, which was formed by rapid conversion from **2** to **2'** during sample dryness and NMR signals collection. The <sup>1</sup>H and <sup>13</sup>C NMR spectra both showed the coexistence of **2** and **2'** with a ratio of around 2 to 1 suggested on the base of the integration values in the <sup>1</sup>H NMR spectrum. Most of the signals in the <sup>1</sup>H and <sup>13</sup>C spectra were well separated, which made it possible to elucidate the structures of **2** and **2'** based on a detailed analysis of the NMR spectra. The <sup>1</sup>H and <sup>13</sup>C NMR spectra of **2** (the major) show a high similarity with those of **1** or **1'**, indicating the presence of the 16-membered lactone moiety and the *tetra*-substituted aromatic ring. The HMBC correlations from H-1, H-19 to C-1 prove the linkage of the 16-membered lactone via an ester carbonyl (C-1). The HMBC cross peaks from H-25 to the *di*-oxygenated

quaternary carbon ( $\delta_C$  98.3, C-21) establish the pyran ring from C-21 to C-25 via O-25, which was further confirmed by the obvious magnetic inequivalence of two geminally coupled protons of H<sub>2</sub>-22 ( $\delta_H$  1.90, H-22a;  $\delta_H$  1.71, H-22b). Detailed analysis of the 1D and 2D NMR spectra determined the structure of to be **2**, a hemiacetal product with spiral ring-open form (Table S4).

The well separated signals of NMR resonance facilitated the elucidation of **2'**, minor compound in the mixture. Careful analyses of the well separated signals of **2'** in the 1D and 2D NMR spectra established the structure of **2'**, which is same as **2** in the 16-membered lactone moiety and the *tetra*-substituted aromatic ring (Table S4). The absence of HMBC correlation from H-25 to C-21 reveals the loss of the pyran ring from C-21 to C-25. The obvious magnetic inequivalence of two geminally coupled protons of H<sub>2</sub>-18 ( $\delta_H$  0.76, H-18a;  $\delta_H$  2.01, H-18b) and H<sub>2</sub>-20 ( $\delta_H$  1.49, H-20a;  $\delta_H$  2.04, H-20b) indicate the presence of a pyran ring from C-17 to C-21 via O-17. The pyran ring from C-17 to C-21 is also suggested by the apparent up-shield shift of carbon signals at C-18 ( $\delta_C$  43.3 in **2**,  $\delta_C$  38.4 in **2'**) and C-20 ( $\delta_C$  48.5 in **2**,  $\delta_C$  41.7 in **2'**), respectively. Meanwhile, the apparent down-shield shift of carbon signals at C-25 ( $\delta_C$  71.7 in **2**,  $\delta_C$  76.6 in **2'**) indicates the ring-open of the pyran ring from C-21 to C-25. A LC-MS analysis of NMR sample confirmed the coexistence of **2** and **2'**.

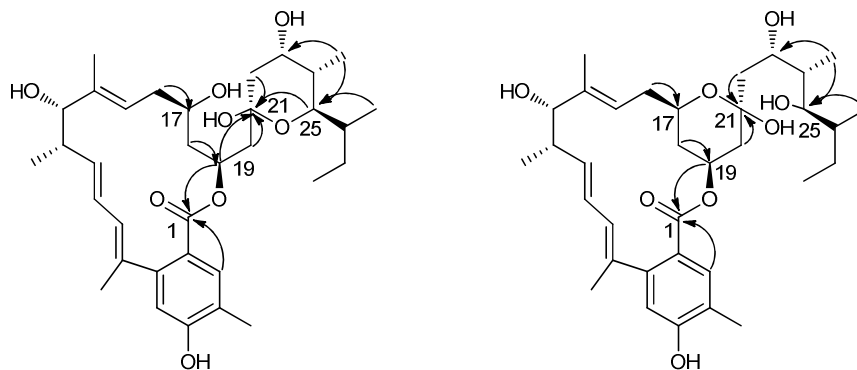

**Key HMBC correlations of compound **2** (left) and **2'** (right)**

### 2.3. Physico-Chemical Properties of **3** and **3'**.

**Compound 3.** ESIMS  $m/z$  627 [ $M + Na$ ]<sup>+</sup>,  $m/z$  1131 [ $2M + Na$ ]<sup>+</sup>, HRESIMS  $m/z$  627.3491 [ $M + Na$ ]<sup>+</sup> (calcd for [ $C_{34}H_{52}NaO_9$ ]<sup>+</sup>, 627.3503).

**Compound 3'.** ESIMS  $m/z$  627  $[M + Na]^+$ ,  $m/z$  1131  $[2M + Na]^+$ , HRESIMS  $m/z$  627.3493  $[M + Na]^+$  (calcd for  $[C_{34}H_{52}NaO_9]^+$ , 627.3503).

#### 2.4. Physico-Chemical Properties and Structural Elucidations of **4** and **4'**.

**Compound 4.** white amorphorous powder;  $[\alpha]_D^{23}$  +41.8 ( $c$  0.62, MeOH); UV (MeOH)  $\lambda_{max}$  (log  $\epsilon$ ) 244 nm (4.54);  $^1H$  and  $^{13}C$  NMR (400 and 100 MHz, respectively, acetone- $d_6$  and methanol- $d_4$ ) see Table S5 and Table S6; ESIMS  $m/z$  611  $[M + Na]^+$ ,  $m/z$  1199  $[2M + Na]^+$ , HRESIMS  $m/z$  611.3572  $[M + Na]^+$  (calcd for  $[C_{34}H_{52}NaO_8]^+$ , 611.3554).

**Compound 4'.** white amorphorous powder;  $[\alpha]_D^{23}$  +31.9 ( $c$  0.34, MeOH); UV (MeOH)  $\lambda_{max}$  (log  $\epsilon$ ) 243 nm (4.51);  $^1H$  and  $^{13}C$  NMR (400 and 100 MHz, respectively, acetone- $d_6$  and methanol- $d_4$ ) see Table S5 and Table S6; ESIMS  $m/z$  611  $[M + Na]^+$ ,  $m/z$  1199  $[2M + Na]^+$ , HRESIMS  $m/z$  611.3580  $[M + Na]^+$  (calcd for  $[C_{34}H_{52}NaO_8]^+$ , 611.3554).

**Structural elucidation of **4** and **4'**.** The molecular formula  $C_{34}H_{52}O_8$  of compounds **4** and **4'** were established by HRESIMS,  $^{13}C$  NMR and DEPT spectra, showing the increase of two mass units in comparison with those of **2** and **2'**. The structures of **4** and **4'** were deduced by comparison of their NMR spectroscopic data with those of compounds **1** and **1'**. The  $^{13}C$  NMR spectrum of **4** indicated the absence of a typical spiro carbon, which was usually at around 100 ppm. Instead, an additional oxymethine carbon ( $\delta_C$  70.3, C-21) was observed. This suggests the absence of a 6,6-spiroacetal ring in **4**. On the basis of detailed analysis of the 1D and 2D NMR spectroscopic data, the  $^1H$  and  $^{13}C$  signals of **4** were assigned (Table S5). The structure of **4** was similar to those of **1** or **1'** with a only exception for the 6,6-spiroacetal ring, which was replaced by a linear polyols chain attached at C-19. Similarly, the structure of **4'** was established based on the analyses of its NMR spectroscopic data (Table S5), which displayed the same planar structure as **4**.

The relative configurations at positions of C-17, C-19, C-23, and C-25 in **4** and **4'** were assigned according to the comparison with those of **1** and **1'**. However, the relative configurations at the

position of C-21 could not be assigned by analyzing the NOESY spectra. The  $^{13}\text{C}$  chemical shifts of **4** and **4'** recollected in MeOD facilitated the assignment of the relative configurations at C-21 by comparing with Kishi's Universal NMR Database (Table S6)<sup>7</sup>. The 1,3,5-triol system was assigned as *syn/syn* in **4** and *anti/anti* in **4'** between C-19/C-21 and C-21/C-23 by comparison of the  $\delta_{\text{C}}$  values at C-21 with the characteristic values of the central carbon of a 1,3,5-triol model system. Thus the relative configurations at C-21 were assigned as (*R*) for **4** and (*S*) for **4'**, respectively.

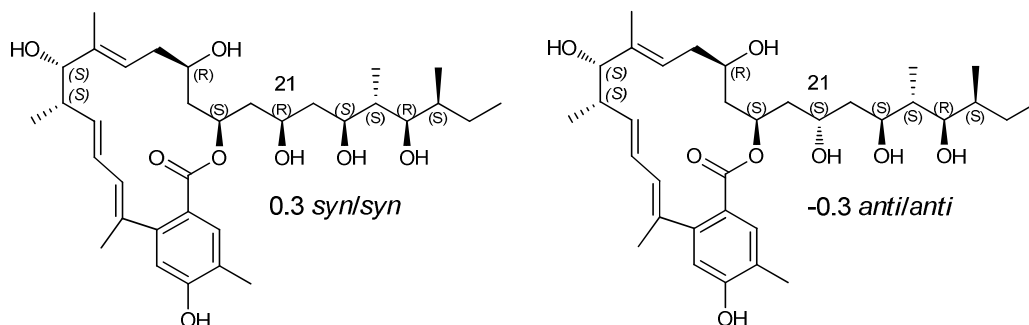

**Assignment of the relative configurations of C-21 in **4** (left) and **4'** (right).**  $\Delta\delta$  values between **4**, **4'** and the model system are shown, respectively.

## 2.5. Physico-Chemical Properties and Structural Elucidations of **5**.

**Compound 5.** white amorphous powder;  $[\alpha]_{\text{D}}^{23} +28.5$  (*c* 0.26, MeOH); UV (MeOH)  $\lambda_{\text{max}}$  (log  $\epsilon$ ) 243 nm (4.25), 206 nm (4.10);  $^1\text{H}$  and  $^{13}\text{C}$  NMR (500 and 125 MHz, respectively, acetone-*d*<sub>6</sub>) see Table S7; ESIMS  $m/z$  651  $[\text{M} + \text{Na}]^+$ ,  $m/z$  1279  $[2\text{M} + \text{Na}]^+$ , HRESIMS  $m/z$  651.3897  $[\text{M} + \text{Na}]^+$  (calcd for  $[\text{C}_{37}\text{H}_{56}\text{NaO}_8]^+$ , 651.3867).

**Structural elucidation of 5.** The molecular formula of **5** was established as  $\text{C}_{37}\text{H}_{56}\text{O}_8$  by HRESIMS together with  $^{13}\text{C}$  NMR and DEPT spectroscopic data. The  $^1\text{H}$  and  $^{13}\text{C}$  NMR spectra of **5** are similar to those of compound **2**, except for the presence of three additional -OCH<sub>3</sub> groups. The locations of methoxy groups at C-5, C-17, and C-23 were suggested by the HMBC correlations between 5-OCH<sub>3</sub> and C-5, between 17-OCH<sub>3</sub> and C-17, and between 23-OCH<sub>3</sub> and C-23. The planar structure of **5** was further determined by detailed analyses of its 1D and 2D NMR data (Table S7). The relative configurations of **5** were deduced by NOESY spectrum analyses. The  $\alpha$ -orientation of H-17 and H-



19 was proved by their NOE correlations. The NOE effects between 21-OH and 23-OCH<sub>3</sub>, and between 21-OH and H-25 indicated the  $\alpha$ -orientation of 21-OH, which was further confirmed by the  $\beta$ -orientation of H-23 and H<sub>b</sub>-22 showing NOE correlations between H-23 and H<sub>b</sub>-22, and by the  $\alpha$ -orientation of H-25 showing NOE correlation between 24-OCH<sub>3</sub> and H-25.

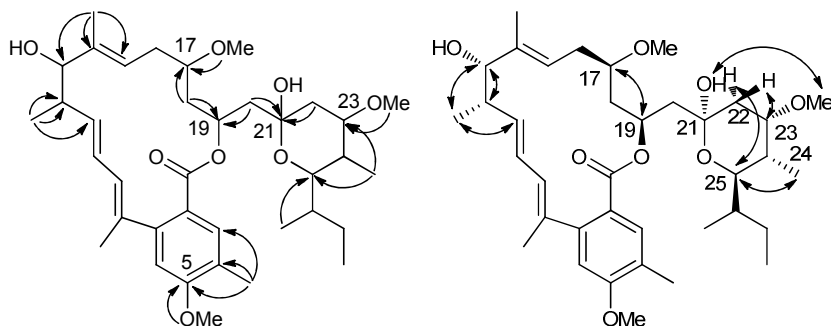

**Key HMBC (left) and NOESY (right) correlations of compound 5**

## 2.6. Physico-Chemical Properties and Structural Elucidations of 6 and 6'.

**Compound 6.** white amorphous powder;  $[\alpha]_D^{23}$  -76.8 (*c* 0.33, MeOH); UV (MeOH)  $\lambda_{\max}$  (log  $\epsilon$ ) 240 nm (4.63); <sup>1</sup>H and <sup>13</sup>C NMR (500 and 125 MHz, respectively, acetone-*d*<sub>6</sub>) see Table S8; ESIMS *m/z* 657 [M + Na]<sup>+</sup>, *m/z* 1291 [2M + Na]<sup>+</sup>, HRESIMS *m/z* 657.3748 [M + Na]<sup>+</sup> (calcd for [C<sub>34</sub>H<sub>54</sub>N<sub>2</sub>NaO<sub>9</sub>]<sup>+</sup>, 657.3722).

**Compound 6'.** white amorphous powder;  $[\alpha]_D^{23}$  -71.2 (*c* 0.22, MeOH); UV (MeOH)  $\lambda_{\max}$  (log  $\epsilon$ ) 240 nm (4.61); <sup>1</sup>H and <sup>13</sup>C NMR (500 and 125 MHz, respectively, acetone-*d*<sub>6</sub>) see Table S8; ESIMS *m/z* 657 [M + Na]<sup>+</sup>, *m/z* 1291 [2M + Na]<sup>+</sup>, HRESIMS *m/z* 657.3738 [M + Na]<sup>+</sup> (calcd for [C<sub>34</sub>H<sub>54</sub>N<sub>2</sub>NaO<sub>9</sub>]<sup>+</sup>, 657.3722).

**Structural elucidation of 6 and 6'.** The molecular formula C<sub>34</sub>H<sub>54</sub>N<sub>2</sub>O<sub>9</sub> of compound 6 and 6' was determined by analyses of their HRESIMS, <sup>13</sup>C NMR and DEPT data. The <sup>13</sup>C spectrum of 6 indicates the presence of two oxime carbons ( $\delta_C$  154.1, C-5;  $\delta_C$  157.4, C-21). Their locations are suggested by the HMBC correlations from H<sub>3</sub>-4Me to C-5, and from H<sub>2</sub>-20, H<sub>2</sub>-22 to C-21. The absence of two aromatic singlet protons in the lower field of <sup>1</sup>H spectrum reveals the lack of aromatic ring. The COSY correlation

between H-2 and H-3 and the HMBC cross peaks between H<sub>2</sub>-6 and C-2, C-4, C-5, C-7 suggest a six-membered ring from C-2 to C-7. The loss of the spiro carbon ( $\delta_C$  at around 100 ppm, C-21) in the <sup>13</sup>C spectrum suggested the opening of the spiro-bicyclic ring, similar to that in **4** and **4'**. A detailed analysis of 1D and 2D NMR spectra established the planar structure of compound **6** (Table S8). The relative configuration of **6** was deduced by analyzing NOESY spectrum and by comparing with the known configurations of natural AVEs. The planar structure of **6'** is the same with that of **6** based on detailed analysis of its NMR data (Table S8). Compounds **6** and **6'** appear to be ketoxime stereoisomers. The configurations of oximes at C-5 and C-21 of **6** and **6'** were established on the base of the *syn-anti*  $\alpha$ -carbon difference<sup>8</sup>. The ketoximes at C-5 of **6** and **6'** are not isomeric due to the effect of a quaternary  $\alpha$ -carbon (C-4) and the steric interference between the oxime OH and 4-methyl. The oxime OHs at C-5 of **6** and **6'** were indicated to be *anti* to the C-4 based on the carbon shifts of  $\Delta_{\alpha\text{-syn}}$  (-16.6 for **6**, -16.4 for **6'**, C-6, compared with C-6 of **7**) and  $\Delta_{\alpha\text{-anti}}$  (-3.0 ppm for **6**, -3.0 ppm for **6'**, C-4, compared with C-4 of **7**). The ketoximes at C-21 of **6** and **6'** appear to be stereoisomeric. Because the up-field shifts effect for the  $\alpha\text{-syn}$  carbon could be greater than that for  $\alpha\text{-anti}$  carbon, the oxime OH at C-21 of **6** was indicated to be *anti* to C-20 ( $\delta_C$  41.5 ppm) and *syn* to C-22 ( $\delta_C$  34.9 ppm). In contrast, the oxime OH at C-21 of **6'** was indicated to be *syn* to C-20 ( $\delta_C$  33.3 ppm) and *anti* to C-22 ( $\delta_C$  39.7 ppm). Thus, the relative configurations of oxime at C-21 were assigned as (*E*) for **6** and (*Z*) for **6'**.

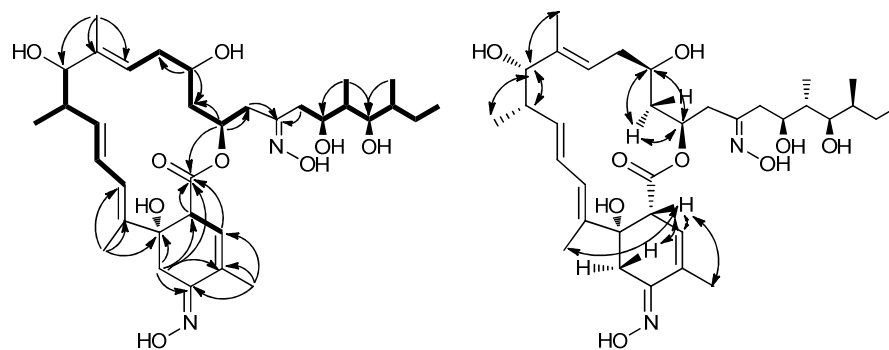

**COSY, Key NOESY and HMBC correlations of compound **6****

## 2.7. Physico-Chemical Properties and Structural Elucidations of **7** and **7'**.

**Compound 7.** white amorphorous powder;  $[\alpha]_D^{23}$  33.1 ( $c$  1.32, MeOH); UV (MeOH)  $\lambda_{\max}$  (log  $\epsilon$ ) 239 nm (4.13);  $^1\text{H}$  and  $^{13}\text{C}$  NMR (500 and 125 MHz, respectively, acetone- $d_6$ ) see Table S9; ESIMS  $m/z$  609  $[\text{M} + \text{Na}]^+$ ,  $m/z$  1195  $[2\text{M} + \text{Na}]^+$ , HRESIMS  $m/z$  609.3421  $[\text{M} + \text{Na}]^+$  (calcd for  $[\text{C}_{34}\text{H}_{50}\text{NaO}_8]^+$ , 609.3398).

**Compound 7'.** white amorphorous powder;  $[\alpha]_D^{28}$  53.6 ( $c$  0.32,  $\text{CHCl}_3$ ); UV (MeOH)  $\lambda_{\max}$  (log  $\epsilon$ ) 242 nm (4.40);  $^1\text{H}$  and  $^{13}\text{C}$  NMR (500 and 125 MHz, respectively, acetone- $d_6$ ) see Table S9; ESIMS  $m/z$  609  $[\text{M} + \text{Na}]^+$ ,  $m/z$  1195  $[2\text{M} + \text{Na}]^+$ , HRESIMS  $m/z$  609.3416  $[\text{M} + \text{Na}]^+$  (calcd for  $[\text{C}_{34}\text{H}_{50}\text{NaO}_8]^+$ , 609.3398).

**Structural elucidation of 7 and 7'.** Compounds **7** and **7'** have a same molecular weight of 586 (609  $[\text{M} + \text{Na}]^+$ ). Their formulae were determined to be  $\text{C}_{34}\text{H}_{50}\text{O}_8$  by their HRESIMS. The  $^{13}\text{C}$  spectrum of **7** indicates the presence of a ketone carbon ( $\delta_{\text{C}}$  197.1, C-5). Its location at C-5 is suggested by the HMBC correlations between  $\text{H}_3$ -4Me,  $\text{H}_2$ -6 and C-5. The COSY correlation between H-2 and H-3 and the HMBC cross peaks between  $\text{H}_2$ -6 and C-2 and C-7 further indicates a six-membered ring from C-2 to C-7. By detailed analysis of the NMR experiments and by comparison its  $^{13}\text{C}$  chemical shifts with those of **1** and **1'**, the planar structure of **7** was elucidated (Table S9). In a similar way, the planar structure of **7'** was also established (Table S9). Compounds **7** and **7'** were shown with a same planar structure.

The relative configurations of **7** and **7'** were assigned by their NOESY spectra and by the comparison of their  $^{13}\text{C}$  data with those of **1** and **1'**. In the NOESY spectrum of **7** the NOE effects between H-17 and H-22b and between H-19 and H-22a indicate the C21-C22 single bond was a  $\alpha$ -orientation. While the NOE correlation between H-20b and H-25 suggests that the C21-O25 single bond has a  $\beta$ -orientation. In the NOESY spectrum of **7'**, the NOE effects between H-17 and H-25, H-27, and  $\text{H}_3$ -28 indicate that C21-O25 single bond has a  $\alpha$ -orientation. The  $\beta$ -orientation of C21-C22 single bond is suggested by NOE correlations between H-20b and H-22a, and between H-23 and H-22a. Thus, the absolute configurations at C-21 of **7** and **7'** was assigned as (*S*) and (*R*), respectively. Compound **7'** was further confirmed to be the 6,8a-seco-6,8a-deoxy-5-oxo-avermectin

B2a aglycone, which have been previously isolated from a mutant strain *S. avermectinius* MA 5218<sup>9</sup>. Compound **7** was assigned as (21*S*)- 6,8*a*-seco-6,8*a*-deoxy-5-oxo-avermectin B2*a* aglycone.

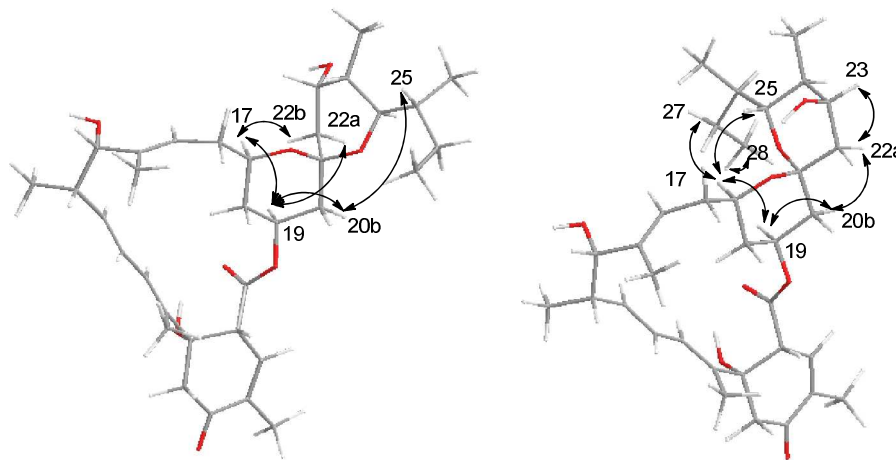

**Key NOESY correlations of compound **7** (left) and **7'** (right)**

## 2.8. Physico-Chemical Properties and Structural Elucidations of **8**.

**Compound 8**. white amorphorous powder;  $[\alpha]_D^{23}$  41.5 ( $c$  0.72,  $\text{CHCl}_3$ ); UV (MeOH)  $\lambda_{\text{max}}$  (log  $\epsilon$ ) 239 nm (4.33);  $^1\text{H}$  and  $^{13}\text{C}$  NMR (400 and 100 MHz, respectively, acetone- $d_6$ ) see Table S10; ESIMS  $m/z$  569  $[\text{M} + \text{H}]^+$ ,  $m/z$  1159  $[2\text{M} + \text{Na}]^+$ , HRESIMS  $m/z$  569.3456  $[\text{M} + \text{H}]^+$  (calcd for  $[\text{C}_{34}\text{H}_{49}\text{O}_7]^+$ , 569.3473).

**Structural elucidation of 8**. The formula of compound **8** was established to be  $\text{C}_{34}\text{H}_{48}\text{O}_7$  by HRESIMS,  $^{13}\text{C}$  NMR and DEPT spectra. The  $^{13}\text{C}$  NMR spectrum of compound **8** was similar to that of **7** except two additional  $\text{sp}^2$  carbons in the lower field ( $\delta_{\text{C}}$  135.9, C-22;  $\delta_{\text{C}}$  129.5, C-23), which suggest the presence of a C22-C23 double-bond. The structure of compound **8** was elucidated by detailed analysis of its 1D and 2D NMR spectra and by comparison with the NMR data of natural “1” type AVEs (Table S10)<sup>4</sup>. In the NOESY spectrum of **8**, the NOE correlations between H-17 and H-25, H<sub>2</sub>-27, and H<sub>3</sub>-28 indicate a  $\alpha$ -orientation of the C21-O25 single bond. The  $\beta$ -orientation of C21-C22 single bond is suggested by NOE correlations between H-20b and H-23. Compound **8** was further confirmed to be the 6,8*a*-seco-6,8*a*-deoxy-5-oxo-avermectin Bla aglycone, which has

previously been isolated from mutant K2057 (aveD aveE X)<sup>6</sup> and proved to be a biosynthetic intermediate of AVE-A1a and AVE-B1a by feeding experiments<sup>9b</sup>.

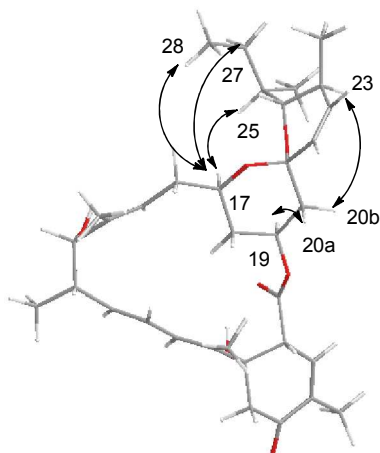

**Key NOESY correlations of compound 8**

### 3. Supplementary Tables

**Table S1. Bacterial strains and plasmids**

| Strain/Plasmid                 | Characteristic(s)                                                          | Sources/Reference |
|--------------------------------|----------------------------------------------------------------------------|-------------------|
| <b><i>E. coli</i></b>          |                                                                            |                   |
| DH5 $\alpha$                   | Host for general cloning                                                   | Invitrogen        |
| ET12567/pUZ8002                | Donor strain for conjugation between <i>E.coli</i> and <i>Streptomyces</i> | <sup>10</sup>     |
| Rosetta                        | Host for gene expression                                                   | Novagen           |
| VL2001                         | recombinant <i>E. coli</i> strain for <i>meiC</i> expression               | This study        |
| <b><i>S. avermectinius</i></b> |                                                                            |                   |
| ATCC 31267                     | Wild type strain, avermectin producing                                     | ATCC              |
| VL1001                         | $\Delta$ <i>aveD</i> mutant, G79L, producing only “B” components           | This study        |
| VL1002                         | $\Delta$ <i>aveDC</i> double mutant                                        | This study        |
| VL1003                         | VL1002 derivative carrying <i>meiC</i> in trans                            | This study        |
| VL1004                         | $\Delta$ <i>aveDCE</i> triple mutant                                       | This study        |
| VL1005                         | ATCC 31267 derivative for site-specific mutation of AveA1-M2-DH            | This study        |
| VL1006                         | VL1002 derivative carrying <i>aveC</i> in trans                            | This study        |
| VL1008                         | $\Delta$ <i>aveDE</i> double mutant                                        | This study        |
| <b><i>S. lividans</i></b>      |                                                                            |                   |
| TK 24                          | Host for gene expression, wide type                                        | <sup>1</sup>      |
| VL1007                         | TK 24 derivative carrying pVL1012 for <i>aveC</i> expression               | This study        |
| VL1009                         | TK 24 derivative carrying pSET152                                          | This study        |
| <b><i>S. nanchangensis</i></b> |                                                                            |                   |
| NS3226                         | Wild type strain, meilingmycins producing                                  | <sup>11</sup>     |
| <b>Plasmids</b>                |                                                                            |                   |
| pMD19-T                        | <i>E. coli</i> subcloning vector                                           | Takara            |

---

|         |                                                                                                                                                                                                                     |               |
|---------|---------------------------------------------------------------------------------------------------------------------------------------------------------------------------------------------------------------------|---------------|
| pKC1139 | <i>E.coli-Streptomyces</i> shuttle vector for gene inactivation,<br>temperature sensitive replication in <i>Streptomyces</i>                                                                                        | <sup>1</sup>  |
| pOJ260  | <i>E.coli-Streptomyces</i> shuttle vector for gene inactivation,<br>non-replicating in <i>Streptomyces</i>                                                                                                          | NRRLB-14785   |
| pSET152 | <i>E.coli-Streptomyces</i> shuttle vector                                                                                                                                                                           | <sup>1</sup>  |
| pQ8     | Protein expression vector, encoding His-MBP-His tag                                                                                                                                                                 | <sup>12</sup> |
| pWHM79  | pGEM-3zf derivative carrying a 0.5 kb fragment<br>containing the <i>Perme</i> * promoter                                                                                                                            | <sup>13</sup> |
| pAGe-2  | Erythromycin resistance cassette containing plasmid                                                                                                                                                                 | <sup>14</sup> |
| pVL1001 | pMD-19T derivative containing partial <i>aveD</i> fragment                                                                                                                                                          | This study    |
| pVL1002 | pMD-19T derivative containing partial <i>aveD</i> fragment                                                                                                                                                          | This study    |
| pVL1003 | pKC1139 derivative containing EcoRI-HindIII fragment<br>of pVL1001 and XbaI-HindIII fragment of pVL1002,<br>construct for <i>aveD</i> site-specific mutation                                                        | This study    |
| pVL1004 | pMD-19T derivative containing partial <i>aveC</i> fragment                                                                                                                                                          | This study    |
| pVL1005 | pMD-19T derivative containing partial <i>aveE</i> fragment                                                                                                                                                          | This study    |
| pVL1006 | pKC1139 derivative containing EcoRI-PstI fragment of<br>pVL1004, PstI-BglII erythromycin resistance cassette<br>and BglII-XbaI fragment of pVL1005, construct for<br><i>aveC</i> and <i>aveE</i> deletion in VL1001 | This study    |
| pVL1007 | pMD-19T derivative containing partial <i>aveC</i> fragment                                                                                                                                                          | This study    |
| pVL1008 | pKC1139 derivative containing EcoRI-PstI fragment of<br>pVL1004 and PstI-XbaI fragment of pVL1007, construct<br>for <i>aveC</i> in-frame deletion in VL1001                                                         | This study    |
| pVL1009 | pMD-19T derivative containing <i>meiC</i> fragment                                                                                                                                                                  | This study    |
| pVL1010 | pSET152 derivative containing EcoRI-BamHI fragment<br>of <i>Perme</i> * and BamHI-XbaI fragment of pVL1009,<br>construct for <i>meiC</i> heterologous complementation in                                            | This study    |

---

---

|         |                                                                                                                                                                                                    |            |
|---------|----------------------------------------------------------------------------------------------------------------------------------------------------------------------------------------------------|------------|
|         | VL1002                                                                                                                                                                                             |            |
| pVL1011 | pMD-19T derivative containing <i>aveC</i> fragment                                                                                                                                                 | This study |
| pVL1012 | pSET152 derivative containing EcoRI-BamHI fragment of <i>PermE*</i> and BamHI-XbaI fragment of pVL1011, construct for <i>aveC</i> complementation in VL1002                                        | This study |
| pVL1013 | pMD-19T derivative containing partial <i>aveA1-M2-DH</i> fragment                                                                                                                                  | This study |
| pVL1014 | pMD-19T derivative containing partial <i>aveA1-M2-DH</i> fragment                                                                                                                                  | This study |
| pVL1015 | pKC1139 derivative containing HindIII-KpnI fragment of pVL1013 and KpnI-BamHI fragment of pVL1014, construct for AveA1-M2-DH site-specific mutation in ATCC 31267                                  | This study |
| pVL1016 | pOJ260 derivative containing partial <i>aveE</i> fragment                                                                                                                                          | This study |
| pVL1017 | pOJ260 derivative containing partial <i>aveE</i> fragment                                                                                                                                          | This study |
| pVL1018 | pOJ260 derivative containing EcoRI-XbaI fragment of pVL1016, XbaI-XbaI fragment of erythromycin resistance gene and XbaI-HindIII fragment of pVL1017, construct for <i>aveE</i> deletion in VL1001 | This study |
| pVL1019 | pQ8 derivative containing <i>meiC</i> fragment                                                                                                                                                     | This study |

---



**Table S2. Primers used in this study.**

| Primers      | Sequences                                                                       |
|--------------|---------------------------------------------------------------------------------|
| aveD-L-for   | 5'- TAT <u>GAA TTC</u> CCT CGT CGA GGT GGC CGA G -3' (EcoRI site underlined)    |
| aveD-L-rev   | 5'- TTA <u>AAG CTT</u> ACC GCA GCC GAC GTC CAG G -3' (HindIII site underlined)  |
| aveD-R-for   | 5'- TTA <u>AAG CTT</u> AAG CCG GCG GTG CGG CTC G -3' (HindIII site underlined)  |
| aveD-R-rev   | 5'- TTA <u>TCT AGA</u> TCC TCA CCC TTT CCC CCG GC -3' (XbaI site underlined)    |
| aveD-gt-for  | 5'- CCC CGC CGT CCA TCC TCT G -3'                                               |
| aveD-gt-rev  | 5'- TAC CGC GGC CGC ACT CAC G -3'                                               |
| aveCE-L-for  | 5'- TTA <u>GAA TTC</u> CAT CAC GCT GCT GGA CTT CG -3' (EcoRI site underlined)   |
| aveCE-L-rev  | 5'- ACG <u>CCT GCA GGG</u> CCA GAA ACA G -3' (PstI site underlined)             |
| aveCE-R-for  | 5'-TAT <u>AGA TCT</u> CGC CGA TGC ATT TGT AGG TGC C-3' (BglII site underlined)  |
| aveCE-R-rev  | 5'- TTA <u>TCT AGA</u> GTT CCG GTC TGC ATC CCA TG -3' (XbaI site underlined)    |
| aveCE-gt-for | 5'- TGC TGT TTC TGG CCC TGC AG -3'                                              |
| aveCE-gt-rev | 5'- GCG CTC GGC ACC TAC AAA TG -3'                                              |
| aveC-R-for   | 5'- TAT <u>CTG CAG</u> GTG AAT GCC GTG ATG TTC CTC -3' (PstI site underlined)   |
| aveC-R-rev   | 5'- TAT <u>TCT AGA</u> TGC TCT CCT CCA CCA CAT CCT C -3' (XbaI site underlined) |
| meiC-c-for   | 5'- TAT <u>GGA TCC</u> CTG CGC AAT AGG CTC ACC AC -3' (BamHI site underlined)   |
| meiC-c-rev   | 5'- TAT <u>TCT AGA</u> CGG GAG GTG TCT ACA AGT GC -3' (XbaI site underlined)    |

---

|             |                                                                                     |
|-------------|-------------------------------------------------------------------------------------|
|             | underlined)                                                                         |
| aveC-c-for  | 5'- TAT <u>GGA TCC</u> AGA TGG ACA TCG ACG ACC TG -3' (BamHI site underlined)       |
| aveC-c-rev  | 5'- TAT <u>TCT AGA</u> CCT TCT CCG TCT CCT CCG ACC -3' (XbaI site underlined)       |
| DH2-L-for   | 5'-CTT <u>AAG CTT</u> CCC CTC CTC ACC CAA AAC GAC AAC-3'(HindIII site underlined)   |
| DH2-L-rev   | 5'- CAC <u>GGT ACC</u> GCC GAC GGC CCC GTC AGC CAG CCA C -3' (KpnI site underlined) |
| DH2-R-for   | 5'- GGG GCC GTC GGC <u>GGT ACC</u> GTG CTG GGC GCC ACC -3'(KpnI site underlined)    |
| DH2-R-rev   | 5'-CTT <u>GGA TCC</u> ACC CCG GGT CAC CAC CAC CAG CCG -3' (BamHI site underlined)   |
| DH2-gt-for  | 5'- CCT CAC CCA CCA CAA CCT CCC CAA CC-3'                                           |
| DH2-gt-rev  | 5'- CGG CTG GAC CAC ACC ATC CAG CAA CG-3'                                           |
| aveE-L-for  | 5'- TT <u>GAA TTC</u> TGG GAA GAG GGC ACA GGG AT -3' (EcoRI site underlined)        |
| aveE-L-rev  | 5'- TGC <u>TCT AGA</u> ATC GCT GAA CCG AGG AGT G -3' (XbaI site underlined)         |
| aveE-R-for  | 5'- TGC <u>TCT AGA</u> CGA TAC GGC TAC GAG GAT GGG -3' (XbaI site underlined)       |
| aveE-R-rev  | 5'- CCC <u>AAG CTT</u> GGC TGA GGA GGA TGG TGT G -3' (HindIII site underlined)      |
| ermE-S      | 5'- TGC <u>TCT AGA</u> GCA GTA GGC GGC GAA CTC C -3' (XbaI site underlined)         |
| ermE-A      | 5'- TGC <u>TCT AGA</u> GGC TTT CCT ACA CCA CGT T -3' (XbaI site underlined)         |
| aveE-gt-for | 5'- CAT TCC GTT CTC GTC TCC AA -3'                                                  |

---

---

aveE-gt-rev      5'- AAG CCC AGA AAC CAC TCC GAG -3'

---

**Table S3. <sup>1</sup>H and <sup>13</sup>C NMR spectroscopic data for 1 and 1',<sup>a</sup>**

| 1        |                                        |                     |                 | 1'                                     |                     |                 |  |
|----------|----------------------------------------|---------------------|-----------------|----------------------------------------|---------------------|-----------------|--|
| position | $\delta_{\text{H}}$ (mult., $J$ in Hz) | $\delta_{\text{C}}$ | mutl.           | $\delta_{\text{H}}$ (mult., $J$ in Hz) | $\delta_{\text{C}}$ | mutl.           |  |
| 1        |                                        | 169.7               | C               |                                        | 169.4               | C               |  |
| 2        |                                        | 123.9               | C               |                                        | 123.8               | C               |  |
| 3        | 7.25 (1H, s)                           | 132.6               | CH              | 7.30 (1H, s)                           | 132.9               | CH              |  |
| 4        |                                        | 123.8               | C               |                                        | 123.7               | C               |  |
| 4-Me     | 2.16 (3H, s)                           | 15.7                | CH <sub>3</sub> | 2.16 (3H, s)                           | 15.7                | CH <sub>3</sub> |  |
| 5        |                                        | 158.0               | C               |                                        | 158.2               | C               |  |
| 5-OH     | 8.61 (1H, s)                           |                     |                 | 8.67 (1H, s)                           |                     |                 |  |
| 6        | 6.69 (1H, s)                           | 114.7               | CH              | 6.17 (1H, s)                           | 114.8               | CH              |  |
| 7        |                                        | 144.7               | C               |                                        | 145.2               | C               |  |
| 8        |                                        | 135.5               | C               |                                        | 135.7               | C               |  |
| 8-Me     | 2.03 (3H, s)                           | 18.4                | CH <sub>3</sub> | 2.02 (3H, s)                           | 18.5                | CH <sub>3</sub> |  |
| 9        | 5.59 (1H, d, 8.0)                      | 129.5               | CH              | 5.59 (1H, d, 10.0)                     | 129.3               | CH              |  |
| 10       | 6.18 (1H, dd, 12.0, 8.0)               | 127.6               | CH              | 6.20 (1H, dd, 15.2, 10.0)              | 127.7               | CH              |  |
| 11       | 5.46 (1H, dd, 12.0, 8.0)               | 136.6               | CH              | 5.48 (1H, dd, 24.8, 10.0)              | 136.6               | CH              |  |
| 12       | 2.58 (1H, m)                           | 41.9                | CH              | 2.60 (1H, m)                           | 41.9                | CH              |  |
| 12-Me    | 1.14 (3H, d, 5.6)                      | 19.3                | CH <sub>3</sub> | 1.14 (3H, d, 6.8)                      | 19.3                | CH <sub>3</sub> |  |
| 13       | 3.94 (1H, brs)                         | 79.4                | CH              | 3.95 (1H, brs)                         | 79.4                | CH              |  |
| 13-OH    | 3.74 (1H, d, 4.0)                      |                     |                 | 3.80 (1H, d, 5.6)                      |                     |                 |  |
| 14       |                                        | 139.1               | C               |                                        | 139.8               | C               |  |
| 14-Me    | 1.59 (3H, s)                           | 15.4                | CH <sub>3</sub> | 1.61 (3H, s)                           | 15.3                | CH <sub>3</sub> |  |
| 15       | 5.31 (1H, brd)                         | 118.3               | CH              | 5.32 (1H, m)                           | 117.9               | CH              |  |
| 16a      | 2.26 (2H, m)                           | 35.2                | CH <sub>2</sub> | 2.32 (1H, m)                           | 34.3                | CH <sub>2</sub> |  |
| 16b      |                                        |                     |                 | 2.29 (1H, m)                           |                     |                 |  |
| 17       | 3.71 (1H, m)                           | 70.5                | CH              | 3.85 (1H, m)                           | 69.9                | CH              |  |
| 18a      | 0.76 (1H, q, 9.6)                      | 37.9                | CH <sub>2</sub> | 1.93 (1H, m)                           | 37.4                | CH <sub>2</sub> |  |

|       |                         |       |                 |                          |       |                 |
|-------|-------------------------|-------|-----------------|--------------------------|-------|-----------------|
| 18b   | 1.86 (1H, brd, 9.6)     |       |                 | 0.76(1H, q, 12.4)        |       |                 |
| 19    | 5.18 (1H, m)            | 69.4  | CH              | 5.34 (1H, m)             | 67.6  | CH              |
| 20a   | 1.23 (1H, m)            | 40.7  | CH <sub>2</sub> | 1.86 (1H, m)             | 42.1  | CH <sub>2</sub> |
| 20b   | 2.83 (1H, dd, 9.3, 3.6) |       |                 | 1.42 (1H, m)             |       |                 |
| 21    |                         | 100.4 | C               |                          | 100.8 | C               |
| 22a   | 1.57 (1H, d, 2.0)       | 40.1  | CH <sub>2</sub> | 1.86 (1H, m)             | 42.3  | CH <sub>2</sub> |
| 22b   | 2.27 (1H, m)            |       |                 | 1.68 (1H, dd, 14.0, 3.2) |       |                 |
| 23    | 4.00 (1H, m)            | 69.1  | CH              | 3.65 (1H, dd, 10.0, 3.0) | 70.4  | CH              |
| 23-OH | 3.92 (1H, d, 2.8)       |       |                 | 3.37 (1H, d, 10.0)       |       |                 |
| 24    | 1.71 (1H, m)            | 36.8  | CH              | 1.58 (1H, m)             | 36.7  | CH              |
| 24-Me | 0.84 (3H, d, 4.0)       | 13.5  | CH <sub>3</sub> | 0.84 (3H, d, 8.0)        | 14.2  | CH <sub>3</sub> |
| 25    | 3.65 (1H, dd, 7.6, 1.2) | 74.7  | CH              | 3.61 (1H, d, 12.0)       | 71.7  | CH              |
| 26    | 1.46 (1H, m)            | 36.3  | CH              | 1.53 (3H, m)             | 36.2  | CH              |
| 26-Me | 0.83 (3H, d, 4.0)       | 13.0  | CH <sub>3</sub> | 0.86 (3H, d, 8.0)        | 12.2  | CH <sub>3</sub> |
| 27a   | 1.26 (1H, m)            | 27.8  | CH <sub>2</sub> | 1.41 (1H, m)             | 28.2  | CH <sub>2</sub> |
| 27b   | 1.42 (1H, m)            |       |                 | 1.54 (1H, m)             |       |                 |
| 28    | 0.84 (3H, t, 4.0)       | 12.4  | CH <sub>3</sub> | 0.95(3H, t, 7.2)         | 12.8  | CH <sub>3</sub> |

<sup>a</sup>In acetone-*d*<sub>6</sub>, 400 MHz for <sup>1</sup>H and 100 MHz for <sup>13</sup>C NMR; Chemical shifts are reported in ppm;

All signals are determined by <sup>1</sup>H-<sup>1</sup>H COSY, HSQC, HMBC, and NOESY correlations.

**Table S4. <sup>1</sup>H and <sup>13</sup>C NMR spectroscopic data for 2 and 2<sup>'</sup><sup>a</sup>**

| position | 2 (major)                                   |                     |                 | 2' (minor)                                  |                     |                 |
|----------|---------------------------------------------|---------------------|-----------------|---------------------------------------------|---------------------|-----------------|
|          | $\delta_{\text{H}}$ (mult., <i>J</i> in Hz) | $\delta_{\text{C}}$ | mutl.           | $\delta_{\text{H}}$ (mult., <i>J</i> in Hz) | $\delta_{\text{C}}$ | mutl.           |
| 1        |                                             | 170.9               | C               |                                             | 171.3               | C               |
| 2        |                                             | 123.1               | C               |                                             | 123.0               | C               |
| 3        | 7.44 (1H, s)                                | 133.8               | CH              | 7.31 (1H, d, 1.0)                           | 133.0               | CH              |
| 4        |                                             | 124.1               | C               |                                             | 124.4               | C               |
| 4-Me     | 2.17 (3H, s)                                | 15.8                | CH <sub>3</sub> | 2.17 (1H, s)                                | 15.7                | CH <sub>3</sub> |
| 5        |                                             | 159.4               | C               |                                             | 159.0               | C               |
| 5-OH     |                                             |                     |                 |                                             |                     |                 |
| 6        | 6.56 (1H, s)                                | 115.1               | CH              | 6.59 (1H, d, 4.3)                           | 114.8               | CH              |
| 7        |                                             | 146.9               | C               |                                             | 145.9               | C               |
| 8        |                                             | 137.1               | C               |                                             | 136.5               | C               |
| 8-Me     | 2.05 (3H, s)                                | 18.9                | CH <sub>3</sub> | 2.06 (3H, s)                                | 18.5                | CH <sub>3</sub> |
| 9        | 5.60 (1H, d, 10.8)                          | 129.4               | CH              | 5.60 (1H, d, 10.8)                          | 129.4               | CH              |
| 10       | 6.16 (1H, dd, 15.1, 10.8)                   | 127.8               | CH              | 6.22 (1H, dd, 15.0, 10.9)                   | 128.3               | CH              |
| 11       | 5.51 (1H, dd, 15.1, 9.8)                    | 136.5               | CH              | 5.45 (1H, dd, 15.0, 10.0)                   | 136.1               | CH              |
| 12       | 2.49 (1H, m)                                | 41.8                | CH              | 2.64 (1H, m)                                | 42.1                | CH              |
| 12-Me    | 1.18 (3H, d, 6.9)                           | 19.1                | CH <sub>3</sub> | 1.18 (3H, d, 6.9)                           | 19.1                | CH <sub>3</sub> |
| 13       | 3.92 (1H, brs)                              | 79.8                | CH              | 3.96 (1H, s)                                | 80.1                | CH              |
| 13-OH    |                                             |                     |                 |                                             |                     |                 |
| 14       |                                             | 139.3               | C               |                                             | 139.4               | C               |
| 14-Me    | 1.59 (3H, s)                                | 15.5                | CH <sub>3</sub> | 1.64 (3H, s)                                | 15.3                | CH <sub>3</sub> |
| 15       | 5.33 (1H, m)                                | 120.3               | CH              | 5.30 (1H, m)                                | 118.7               | CH              |
| 16       | 2.25 (2H, m)                                | 38.7                | CH <sub>2</sub> | 2.35 (2H, m)                                | 34.6                | CH <sub>2</sub> |
| 17       | 3.65 (1H, m)                                | 70.5                | CH              | 4.10 (1H, m)                                | 69.8                | CH              |
| 18a      | 1.73 (1H, m)                                | 43.3                | CH <sub>2</sub> | 0.76 (1H, m)                                | 38.4                | CH <sub>2</sub> |

|       |                      |      |                 |                                |       |                 |
|-------|----------------------|------|-----------------|--------------------------------|-------|-----------------|
| 18b   | 1.49 (1H, m)         |      |                 | 2.01 (1H, m)                   |       |                 |
| 19    | 5.41 (1H, m)         | 71.0 | CH              | 5.42 (1H, m)                   | 69.3  | CH              |
| 20a   | 2.05 (1H, m)         | 48.5 | CH <sub>2</sub> | 1.49 (1H, m)                   | 41.7  | CH <sub>2</sub> |
| 20b   | 1.91 (1H, m)         |      |                 | 2.04 (1H, m)                   |       |                 |
| 21    |                      | 98.3 | C               |                                | 100.1 | C               |
| 22a   | 1.90 (1H, m)         | 40.9 | CH <sub>2</sub> | 1.73 (2H, m)                   | 41.8  | CH <sub>2</sub> |
| 22b   | 1.71 (1H, m)         |      |                 |                                |       |                 |
| 23    | 3.82 (1H, m)         | 71.7 | CH              | 4.41 (1H, ddd, 10.3, 4.7, 1.8) | 70.6  | CH              |
| 23-OH |                      |      |                 |                                |       |                 |
| 24    | 1.55 (1H, m)         | 36.9 | CH              | 1.89 (1H, m)                   | 43.0  | CH              |
| 24-Me | 0.84 (3H, d, 6.7)    | 12.6 | CH <sub>3</sub> | 0.80 (3H, d, 7.0)              | 11.3  | CH <sub>3</sub> |
| 25    | 3.81 (1H, m)         | 71.7 | CH              | 3.34 (1H, m)                   | 76.6  | CH              |
| 26    | 1.49 (1H, m)         | 36.4 | CH              | 1.50 (1H, m)                   | 38.1  | CH              |
| 26-Me | 0.86 (3H, d, 7.4 Hz) | 14.2 | CH <sub>3</sub> | 0.84 (3H, d, 6.7)              | 12.2  | CH <sub>3</sub> |
| 27a   | 1.41 (1H, m)         | 28.1 | CH <sub>2</sub> | 1.30 (1H, m)                   | 28.2  | CH <sub>2</sub> |
| 27b   | 1.30 (1H, m)         |      |                 | 1.46 (1H, m)                   |       |                 |
| 28    | 0.87 (3H, t, 7.5)    | 12.8 | CH <sub>3</sub> | 0.92 (3H, t, 7.4)              | 12.3  | CH <sub>3</sub> |

<sup>a</sup>In methanol-*d*<sub>4</sub>, 500 MHz for <sup>1</sup>H and 125 MHz for <sup>13</sup>C NMR; Chemical shifts are reported in ppm;

All signals are determined by <sup>1</sup>H-<sup>1</sup>H COSY, HSQC, HMBC, and NOESY correlations.

**Table S5.**  $^1\text{H}$  and  $^{13}\text{C}$  NMR spectroscopic data for **4** and **4'** in acetone- $d_6$ <sup>a</sup>

| position | <b>4</b>                               |                     |                 | <b>4'</b>                              |                     |                 |
|----------|----------------------------------------|---------------------|-----------------|----------------------------------------|---------------------|-----------------|
|          | $\delta_{\text{H}}$ (mult., $J$ in Hz) | $\delta_{\text{C}}$ | mutl.           | $\delta_{\text{H}}$ (mult., $J$ in Hz) | $\delta_{\text{C}}$ | mutl.           |
| 1        |                                        | 169.2               | C               |                                        | 169.9               | C               |
| 2        |                                        | 122.9               | C               |                                        | 122.3               | C               |
| 3        | 7.51 (1H, s)                           | 134.0               | CH              | 7.56 (1H, s)                           | 134.3               | CH              |
| 4        |                                        | 123.7               | C               |                                        | 123.7               | C               |
| 4-Me     | 2.20 (3H, s)                           | 15.5                | CH <sub>3</sub> | 2.19 (3H, s)                           | 15.8                | CH <sub>3</sub> |
| 5        |                                        | 158.8               | C               |                                        | 159.1               | C               |
| 5-OH     |                                        |                     |                 |                                        |                     |                 |
| 6        | 6.68 (1H, s)                           | 115.3               | CH              | 6.67 (1H, s)                           | 115.3               | CH              |
| 7        |                                        | 146.6               | C               |                                        | 147.0               | C               |
| 8        |                                        | 136.5               | C               |                                        | 136.6               | C               |
| 8-Me     | 2.05 (3H, s)                           | 19.1                | CH <sub>3</sub> | 2.01 (3H, s)                           | 19.2                | CH <sub>3</sub> |
| 9        | 5.61 (1H, d, 11.0)                     | 128.9               |                 | 5.61 (1H, d, 12.0)                     | 128.8               |                 |
| 10       | 6.19 (1H, dd, 15.0, 11.0)              | 127.3               |                 | 6.18 (1H, dd, 12.0, 8.5)               | 127.2               |                 |
| 11       | 5.56 (1H, dd, 15.0, 9.6)               | 136.7               |                 | 5.57 (1H, dd, 15.0, 10.5)              | 136.8               |                 |
| 12       | 2.51 (1H, m)                           | 41.7                |                 | 2.49 (1H, m)                           | 41.7                |                 |
| 12-Me    | 1.18 (3H, d, 6.8)                      | 19.4                | CH <sub>3</sub> | 1.18 (3H, d, 7.0)                      | 19.4                | CH <sub>3</sub> |
| 13       | 3.95 (1H, m)                           | 79.2                |                 | 3.94 (1H, m)                           | 79.2                |                 |
| 13-OH    |                                        |                     |                 |                                        |                     |                 |
| 14       |                                        | 139.0               |                 |                                        | 139.0               |                 |
| 14-Me    | 1.60 (3H, s)                           | 15.4                | CH <sub>3</sub> | 1.58 (3H, s)                           | 15.5                | CH <sub>3</sub> |
| 15       | 5.40 (1H, m)                           | 120.1               | CH              | 5.39 (1H, m)                           | 120.2               | CH              |
| 16       | 2.24 (2H, m)                           | 38.8                | CH <sub>2</sub> | 2.22 (2H, m)                           | 38.8                | CH <sub>2</sub> |
| 17       | 3.69 (1H, m)                           | 70.3                | CH              | 3.62 (1H, t, 9.5)                      | 70.0                | CH              |
| 18a      | 1.80 (1H, m)                           | 41.6                | CH <sub>2</sub> | 1.83 (1H, dd, 14.0, 5.5)               | 42.8                | CH <sub>2</sub> |



|       |                   |      |                 |                    |      |                 |
|-------|-------------------|------|-----------------|--------------------|------|-----------------|
| 18b   | 1.53 (1H, m)      |      |                 | 1.42 (1H, m)       |      |                 |
| 19    | 5.31 (1H, m)      | 71.9 | CH              | 5.37 (1H, d, 11.5) | 71.9 | CH              |
| 20a   | 1.95 (1H, m)      | 44.4 | CH <sub>2</sub> | 1.98 (1H, d, 11.5) | 45.3 | CH <sub>2</sub> |
| 20b   | 1.87 (1H, m)      |      |                 | 1.67 (1H, m)       |      |                 |
| 21    | 3.92 (1H, m)      | 70.3 | CH              | 3.89 (1H, t, 9.0)  | 65.9 | CH              |
| 22a   | 1.84 (1H, m)      | 40.0 | CH <sub>2</sub> | 1.61 (1H, m)       | 41.3 | CH <sub>2</sub> |
| 22b   | 1.39 (1H, m)      |      |                 | 1.44 (1H, m)       |      |                 |
| 23    | 3.98 (1H, m)      | 76.7 | CH              | 3.98 (1H, m)       | 73.3 | CH              |
| 23-OH |                   |      |                 |                    |      |                 |
| 24    | 1.66 (1H, m)      | 42.8 | CH              | 1.66 (1H, m)       | 42.2 | CH              |
| 24-Me | 0.75 (3H, d, 6.8) | 12.4 | CH <sub>3</sub> | 0.71 (3H, d, 6.5)  | 12.7 | CH <sub>3</sub> |
| 25    | 3.45 (1H, d, 8.4) | 77.5 | CH              | 3.44 (1H, d, 9.5)  | 77.8 | CH              |
| 26    | 1.49 (1H, m)      | 37.9 | CH              | 1.47 (1H, m)       | 37.8 | CH              |
| 26-Me | 0.84 (3H, d, 6.4) | 12.4 | CH <sub>3</sub> | 0.81 (3H, d, 6.5)  | 12.4 | CH <sub>3</sub> |
| 27a   | 1.44 (1H, m)      | 27.9 | CH <sub>2</sub> | 1.43 (1H, m)       | 27.9 | CH <sub>2</sub> |
| 27b   | 1.31 (1H, m)      |      |                 | 1.29 (1H, m)       |      |                 |
| 28    | 0.90 (3H, t, 6.8) | 12.5 | CH <sub>3</sub> | 0.88 (3H, t, 6.5)  | 12.4 | CH <sub>3</sub> |

<sup>a</sup>In acetone-*d*<sub>6</sub>, 400 MHz for <sup>1</sup>H and 100 MHz for <sup>13</sup>C NMR; Chemical shifts are reported in ppm;

All signals are determined by <sup>1</sup>H-<sup>1</sup>H COSY, HSQC, HMBC, and NOESY correlations.

**Table S6.**  $^{13}\text{C}$  NMR spectroscopic data for **4** and **4'** in methnol- $d_4$ <sup>a</sup>

|          | <b>4</b>            | <b>4'</b>           |
|----------|---------------------|---------------------|
| position | $\delta_{\text{C}}$ | $\delta_{\text{C}}$ |
| 1        | 170.7               | 171.3               |
| 2        | 122.4               | 122.5               |
| 3        | 134.1               | 134.1               |
| 4        | 124.2               | 124.2               |
| 4-Me     | 15.7                | 15.7                |
| 5        | 159.6               | 159.5               |
| 6        | 115.2               | 115.1               |
| 7        | 147.1               | 147.0               |
| 8        | 136.3               | 136.7               |
| 8-Me     | 19.1                | 18.9                |
| 9        | 129.1               | 129.3               |
| 10       | 127.9               | 127.9               |
| 11       | 137.1               | 137.0               |
| 12       | 41.9                | 41.8                |
| 12-Me    | 19.2                | 19.1                |
| 13       | 79.9                | 79.8                |
| 14       | 139.2               | 139.2               |
| 14-Me    | 15.5                | 15.5                |
| 15       | 120.2               | 120.2               |
| 16       | 38.8                | 38.8                |
| 17       | 70.1                | 70.7                |
| 18       | 41.9                | 43.1                |
| 19       | 72.4                | 71.2                |
| 20       | 44.2                | 45.7                |
| 21       | 70.7                | 66.0                |

|       |      |      |
|-------|------|------|
| 22    | 38.9 | 40.6 |
| 23    | 74.5 | 72.4 |
| 24    | 43.0 | 42.7 |
| 24-Me | 12.2 | 12.4 |
| 25    | 77.0 | 77.0 |
| 26    | 38.0 | 38.0 |
| 26-Me | 11.4 | 11.6 |
| 27    | 28.2 | 28.2 |
| 28    | 12.4 | 12.2 |

<sup>a</sup>100 MHz; Chemical shifts are reported in ppm

**Table S7.  $^1\text{H}$  and  $^{13}\text{C}$  NMR spectroscopic data for **5**<sup>a</sup>**

| position | $\delta_{\text{H}}$ (mult., $J$ in Hz) | $\delta_{\text{C}}$ | mult.           | HMBC (H $\rightarrow$ C) | NOESY            |
|----------|----------------------------------------|---------------------|-----------------|--------------------------|------------------|
| 1        |                                        | 168.3               | C               |                          |                  |
| 2        |                                        | 123.9               | C               |                          |                  |
| 3        | 7.54 (1H, s)                           | 133.0               | CH              | C-1, 5, 7, 4-Me          | 4-Me             |
| 4        |                                        | 125.1               | C               |                          |                  |
| 4-Me     | 2.17 (1H, s)                           | 15.9                | CH <sub>3</sub> | C-3, 4, 5                | 3, 21-OH         |
| 5        |                                        | 160.5               | C               |                          |                  |
| 5-OMe    | 3.89 (3H, s)                           | 55.9                | CH <sub>3</sub> | C-5                      | 6                |
| 6        | 6.73 (1H, s)                           | 110.7               | CH              | C-2, 4, 5, 8             | 5-OMe, 8-Me      |
| 7        |                                        | 146.8               | C               |                          |                  |
| 8        |                                        | 137.0               | C               |                          |                  |
| 8-Me     | 2.07 (3H, s)                           | 19.3                | CH <sub>3</sub> | C-7, 8, 9                | 6, 10            |
| 9        | 5.65 (1H, d, 11.0)                     | 128.9               | CH              | C-7, 11, 8-Me            | 10, 11           |
| 10       | 6.22 (1H, dd, 15.0, 11.0)              | 127.2               | CH              | C-8, 9, 12               | 8-Me, 11, 12     |
| 11       | 5.59 (1H, dd, 15.0, 11.0)              | 136.7               | CH              | C-9, 8-Me                | 9, 12-Me         |
| 12       | 2.50 (1H, m)                           | 41.7                | CH              | 12-Me                    | 11, 13, 12-Me    |
| 12-Me    | 1.19 (3H, d, 6.9)                      | 19.3                | CH <sub>3</sub> | C-11, 12, 13             | 11, 12, 13       |
| 13       | 3.95 (1H, brs)                         | 79.0                | CH              |                          | 12, 12-Me, 14-Me |
| 14       |                                        | 139.5               | C               |                          |                  |
| 14-Me    | 1.58 (3H, s)                           | 15.3                | CH <sub>3</sub> | C-13, 14, 15             | 12, 13           |
| 15       | 5.37 (1H, dd, 11.2, 5.0)               | 112.0               | CH              | C-14-Me, 13              | 16, 17           |
| 16a      | 2.35 (1H, m)                           | 33.7                | CH <sub>2</sub> | C17, 18                  | 15, 19           |
| 16b      | 2.03 (1H, m)                           |                     |                 |                          |                  |
| 17       | 3.14 (1H, m)                           | 80.0                | CH              | 17-OMe                   | 16, 17-OMe, 19   |
| 17-OMe   | 3.30 (3H, s)                           | 56.9                | CH <sub>3</sub> | C-17                     | 16, 17           |

|        |                          |      |                 |                |                |
|--------|--------------------------|------|-----------------|----------------|----------------|
| 18a    | 1.67 (1H, m)             | 41.9 | CH <sub>2</sub> | C-16,17,19, 20 | 19             |
| 18b    | 1.61 (1H, m)             |      |                 |                |                |
| 19     | 5.46 (1H, m)             | 69.8 | CH              | C-1, 17, 21    | 17, 18, 20     |
| 20a    | 1.97 (1H, dd, 14.4, 4.6) | 47.9 | CH <sub>2</sub> |                |                |
| 20b    | 1.80 (1H, dd, 14.4, 7.4) |      |                 | C-18,19, 21,22 | 19             |
| 21     |                          | 97.2 | C               |                |                |
| 21-OH  | 5.14 (1H, s)             |      |                 | C-20, 21, 22   | 23-OMe, 25     |
| 22a    | 2.19 (1H, m)             | 35.8 | CH <sub>2</sub> | C23, 24        |                |
| 22b    | 1.61 (1H, m)             |      |                 |                |                |
| 23     | 3.51 (1H, dd, 5.6, 2.8)  | 81.9 | CH              |                | 22b            |
| 23-OMe | 3.42 (3H, s)             | 58.1 | CH <sub>3</sub> | C-23           | 21-OH, 22b, 23 |
| 24     | 1.63 (1H, m)             | 36.4 | CH              |                |                |
| 24-Me  | 0.87 (3H, d, 5.4)        | 13.8 | CH <sub>3</sub> | C-23, 25       |                |
| 25     | 3.72(1H, d, 11.0)        | 70.5 | CH              | C-27, 26-Me    | 21-OH          |
| 26     | 1.49 (1H, m)             | 35.8 | CH              | 26-Me          |                |
| 26-Me  | 0.86 (3H, d, 5.4)        | 12.8 | CH <sub>3</sub> | C-25           | 25             |
| 27a    | 1.42 (1H, m)             | 27.6 | CH <sub>2</sub> | C-28, 25, 26   | 28             |
| 27b    | 1.31 (1H, m)             |      |                 |                |                |
| 28     | 0.84 (3H, d, 5.0)        | 12.3 | CH <sub>3</sub> | C-27           | 27             |

<sup>a</sup>In acetone-*d*<sub>6</sub>, 500 MHz for <sup>1</sup>H and 125 MHz for <sup>13</sup>C NMR; Chemical shifts are reported in ppm;

All signals are determined by <sup>1</sup>H-<sup>1</sup>H COSY, HSQC, HMBC, and NOESY correlations.

**Table S8.  $^1\text{H}$  and  $^{13}\text{C}$  NMR spectroscopic data for 6 and 6<sup>a</sup>**

| position | 6                                      |                     |                 | 6 <sup>a</sup>                         |                     |                 |
|----------|----------------------------------------|---------------------|-----------------|----------------------------------------|---------------------|-----------------|
|          | $\delta_{\text{H}}$ (mult., $J$ in Hz) | $\delta_{\text{C}}$ | mutl.           | $\delta_{\text{H}}$ (mult., $J$ in Hz) | $\delta_{\text{C}}$ | mutl.           |
| 1        |                                        | 175.5               | C               |                                        | 175.1               | C               |
| 2        | 3.67 (1H, t, 2.0)                      | 48.7                | C               | 3.74 (1H, t, 2.0)                      | 48.7                | C               |
| 3        | 5.64 (1H, brs)                         | 125.7               | CH              | 5.72 (1H, br s)                        | 125.9               | CH              |
| 4        |                                        | 132.9               | C               |                                        | 133.0               | C               |
| 4-Me     | 1.83 (3H, s)                           | 17.7                | CH <sub>3</sub> | 1.84 (3H, s)                           | 17.7                | CH <sub>3</sub> |
| 5        |                                        | 154.1               | C               |                                        | 154.1               | C               |
| 5-NOH    | 10.03 (1H, s)                          |                     |                 | 10.05 (1H, s)                          |                     |                 |
| 6a       | 2.99 (1H, d, 16.9)                     | 33.2                | CH              | 2.98 (1H, d, 16.8)                     | 33.5                | CH              |
| 6b       | 2.36 (1H, dd, 15.9, 6.5)               |                     |                 | 2.39 (1H, d, 16.8)                     |                     |                 |
| 7        |                                        | 75.8                | C               |                                        | 76.0                | C               |
| 8        |                                        | 138.1               | C               |                                        | 138.2               | C               |
| 8-Me     | 1.81 (3H, s)                           | 14.14               | CH <sub>3</sub> | 1.82 (3H, s)                           | 14.2                | CH <sub>3</sub> |
| 9        | 6.30 (1H, d, 10.9)                     | 125.9               | CH              | 6.31 (1H, d, 11.0)                     | 125.9               | CH              |
| 10       | 6.08 (1H, dd, 15.1, 11.0)              | 127.3               | CH              | 6.08 (1H, dd, 15.0, 11.0)              | 127.3               | CH              |
| 11       | 5.53 (1H, m)                           | 136.8               | CH              | 5.53 (1H, dd, 13.6, 8.5)               | 136.9               | CH              |
| 12       | 2.44 (1H, m)                           | 41.8                | CH              | 2.45 (1H, ddd, 9.0, 6.7, 2.0)          | 41.8                | CH              |
| 12-Me    | 1.19 (3H, d, 6.8)                      | 18.7                | CH <sub>3</sub> | 1.19 (3H, d, 6.8)                      | 18.8                | CH <sub>3</sub> |
| 13       | 3.95 (1H, m)                           | 79.4                | CH              | 3.95 (1H, br s)                        | 79.4                | CH              |
| 13-OH    | 3.56 (1H, d, 4.6)                      |                     |                 | 3.57 (1H, d, 4.3)                      |                     |                 |
| 14       |                                        | 137.2               | C               |                                        | 137.4               | C               |
| 14-Me    | 1.55 (3H, s)                           | 15.1                | CH <sub>3</sub> | 1.56 (3H, s)                           | 15.2                | CH <sub>3</sub> |
| 15       | 5.58 (1H, m)                           | 121.3               | CH              | 5.54 (1H, dd, 11.0, 4.0)               | 121.5               | CH              |
| 16a      | 2.20 (1H, ddd, 13.5,                   | 37.2                | CH <sub>2</sub> | 2.23 (1H, m)                           | 37.4                | CH <sub>2</sub> |

|            |                          |       |                 |                                |       |                 |
|------------|--------------------------|-------|-----------------|--------------------------------|-------|-----------------|
|            | 11.5, 4.5)               |       |                 |                                |       |                 |
| 16b        | 1.94 (1H, m)             |       |                 | 1.97 (1H, m)                   |       |                 |
| 17         | 3.35 (1H, m)             | 69.0  | CH              | 3.34 (1H, br s)                | 69.1  | CH              |
| 18a        | 1.63 (1H, m)             | 43.2  | CH <sub>2</sub> | 1.64 (1H, ddd, 14.1, 7.8, 2.2) | 43.3  | CH <sub>2</sub> |
| 18b        | 1.53 (1H, m)             |       |                 | 1.56 (1H, m)                   |       |                 |
| 19         | 5.47 (1H, m)             | 71.3  | CH              | 5.55 (1H, m)                   | 71.9  | CH              |
| 20a        | 2.81 (1H, m)             | 41.5  | CH <sub>2</sub> | 2.92 (1H, dd, 13.6, 3.8)       | 34.9  | CH <sub>2</sub> |
| 20b        | 2.56 (1H, dd, 15.4, 9.7) |       |                 | 2.76 (1H, dd, 13.5, 9.3)       |       |                 |
| 21         |                          | 157.4 | C               |                                | 157.2 | C               |
| 21-<br>NOH | 9.88 (1H, s)             |       |                 | 9.87 (1H, s)                   |       |                 |
| 22a        | 2.78 (1H, dd, 15.4, 2.5) | 33.3  | CH <sub>2</sub> | 2.55 (1H, dd, 15.7, 2.4)       | 39.7  | CH <sub>2</sub> |
| 22b        | 2.33 (1H, m)             |       |                 | 2.31 (1H, dd, 15.7, 9.5)       |       |                 |
| 23         | 4.12 (1H, t, 7.1)        | 73.5  | CH              | 4.13 (1H, t, 2.0)              | 72.9  | CH              |
| 23-OH      | 4.41 (1H, brs)           |       |                 | 4.31 (1H, br s)                |       |                 |
| 24         | 1.72 (1H, m)             | 43.2  | CH              | 1.75 (1H, dt, 9.2, 6.8)        | 42.2  | CH              |
| 24-Me      | 0.85 (3H, d, 6.8)        | 12.4  | CH <sub>3</sub> | 0.81 (3H, d, 6.9)              | 12.4  | CH <sub>3</sub> |
| 25         | 3.51 (1H, m)             | 77.5  | CH              | 3.46 (1H, d, 9.4)              | 77.1  | CH              |
| 26         | 1.52 (1H, m)             | 37.8  | CH              | 1.51 (1H, m)                   | 37.7  | CH              |
| 26-Me      | 0.85 (3H, d, 6.8)        | 12.3  | CH <sub>3</sub> | 0.83 (3H, d, 6.6)              | 12.4  | CH <sub>3</sub> |
| 27a        | 1.46 (1H, m)             | 27.9  | CH <sub>2</sub> | 1.45 (1H, m)                   | 27.9  | CH <sub>2</sub> |
| 27b        | 1.31 (1H, m)             |       |                 | 1.31 (1H, m)                   |       |                 |
| 28         | 0.90 (3H, t, 7.4)        | 12.4  | CH <sub>3</sub> | 0.89 (3H, t, 7.4)              | 12.4  | CH <sub>3</sub> |

<sup>a</sup>In acetone-*d*<sub>6</sub>, 500 MHz for <sup>1</sup>H and 125 MHz for <sup>13</sup>C NMR; Chemical shifts are reported in ppm;

All signals are determined by <sup>1</sup>H-<sup>1</sup>H COSY, HSQC, HMBC, and NOESY correlations.

**Table S9. <sup>1</sup>H and <sup>13</sup>C NMR spectroscopic data for 7 and 7',<sup>a</sup>**

| position | 7                                           |                     |                 | 7'                                          |                     |                 |
|----------|---------------------------------------------|---------------------|-----------------|---------------------------------------------|---------------------|-----------------|
|          | $\delta_{\text{H}}$ (mult., <i>J</i> in Hz) | $\delta_{\text{C}}$ | mutl.           | $\delta_{\text{H}}$ (mult., <i>J</i> in Hz) | $\delta_{\text{C}}$ | mutl.           |
| 1        |                                             | 172.0               | C               |                                             | 171.8               | C               |
| 2        | 3.95 (1H, d, 4.8)                           | 49.2                | C               | 3.94 (1H, m)                                | 49.3                | C               |
| 3        | 6.59 (1H, m)                                | 138.9               | CH              | 6.59 (1H, m)                                | 139.0               | CH              |
| 4        |                                             | 136.0               | C               |                                             | 135.9               | C               |
| 4-Me     | 1.77 (3H, dd, 2.4, 1.5)                     | 15.7                | CH <sub>3</sub> | 1.76 (3H, dd, 2.4, 1.5)                     | 15.7                | CH <sub>3</sub> |
| 5        |                                             | 197.1               | C               |                                             | 197.1               | C               |
| 6a       | 3.00 (1H, d, 16.0)                          | 48.8                | CH              | 2.99 (1H, d, 16.1)                          | 48.9                | CH              |
| 6b       | 2.24 (1H, d, 16.0)                          |                     | CH              | 2.24 (1H, d, 16.1)                          |                     | CH              |
| 7        |                                             | 80.4                | C               |                                             | 80.5                | C               |
| 8        |                                             | 137.5               | C               |                                             | 137.7               | C               |
| 8-Me     | 1.86 (3H, s)                                | 14.3                | CH <sub>3</sub> | 1.86 (3H, s)                                | 14.3                | CH <sub>3</sub> |
| 9        | 6.21 (1H, dd, 14.0, 8.0)                    | 125.8               | CH              | 6.22 (1H, dd, 24.0, 10.1)                   | 125.8               | CH              |
| 10       | 6.19 (1H, dd, 14.0, 8.0)                    | 127.0               | CH              | 6.19 (1H, dd, 24.4, 10.1)                   | 127.1               | CH              |
| 11       | 5.57 (1H, dd, 14.2, 10.2)                   | 137.1               | CH              | 5.59 (1H, dd, 14.3, 10.2)                   | 137.1               | CH              |
| 12       | 2.56 (1H, m)                                | 41.6                | CH              | 2.59 (1H, m)                                | 41.7                | CH              |
| 12-Me    | 1.18 (3H, d, 6.8)                           | 19.6                | CH <sub>3</sub> | 1.18 (3H, d, 6.8)                           | 19.7                | CH <sub>3</sub> |
| 13       | 3.96 (1H, m)                                | 79.2                | CH              | 3.96 (1H, m)                                | 79.2                | CH              |
| 13-OH    |                                             |                     |                 | 3.84 (1H, d, 5.2)                           |                     |                 |
| 14       |                                             | 139.4               | C               |                                             | 140.1               | C               |
| 14-Me    | 1.61 (3H, s)                                | 15.2                | CH <sub>3</sub> | 1.63 (3H, s)                                | 15.1                | CH <sub>3</sub> |
| 15       | 5.33 (1H, m)                                | 118.0               | CH              | 5.34 (1H, dd, 9.6, 2.9)                     | 117.5               | CH              |
| 16       | 2.26 (1H, m)                                | 35.8                | CH <sub>2</sub> | 2.33 (2H, m)                                | 34.9                | CH <sub>2</sub> |
| 17       | 3.83 (1H, m)                                | 70.3                | CH              | 3.78 (1H, m)                                | 69.7                | CH              |
| 18a      | 1.73 (1H, m)                                | 37.0                | CH <sub>2</sub> | 1.83 (1H, m)                                | 36.7                | CH <sub>2</sub> |



|       |                         |       |                 |                          |       |                 |
|-------|-------------------------|-------|-----------------|--------------------------|-------|-----------------|
| 18b   | 0.80 (1H, m)            |       |                 | 0.86 (1H, q, 11.0)       |       |                 |
| 19    | 4.99 (1H, m)            | 70.0  | CH              | 5.16 (1H, m)             | 68.3  | CH              |
| 20a   | 2.92 (1H, dd, 6.8, 1.6) | 40.5  | CH <sub>2</sub> | 2.01 (1H, m)             | 41.9  | CH <sub>2</sub> |
| 20b   | 1.34 (1H, m)            |       |                 | 1.44 (1H, m)             |       |                 |
| 21    |                         | 100.0 | C               |                          | 100.5 | C               |
| 22a   | 2.23 (1H, m)            | 40.1  | CH <sub>2</sub> | 1.92 (1H, dd, 14.1, 2.9) | 42.2  | CH <sub>2</sub> |
| 22b   | 1.60 (1H, m)            |       |                 | 1.73 (1H, dd, 14.1, 3.5) |       |                 |
| 23    | 4.02 (1H, m)            | 68.9  | CH              | 3.69 (1H, m)             | 70.2  | CH              |
| 23-OH |                         |       |                 | 3.35 (1H, d, 10.0)       |       |                 |
| 24    | 1.71 (1H, m)            | 36.6  | CH              | 1.62 (5H, m)             | 36.6  | CH              |
| 24-Me | 0.86 (3H, d, 8.0)       | 13.0  | CH <sub>3</sub> | 0.87 (3H, d, 6.6)        | 14.1  | CH <sub>3</sub> |
| 25    | 3.68 (1H, dd, 9.6, 2.6) | 74.6  | CH              | 3.61 (1H, dd, 10.7, 1.4) | 71.6  | CH              |
| 26    | 1.54 (1H, m)            | 36.2  | CH              | 1.50 (1H, m)             | 36.0  | CH              |
| 26-Me | 0.88 (3H, d, 8.0)       | 13.4  | CH <sub>3</sub> | 0.87 (3H, d, 6.9)        | 12.1  | CH <sub>3</sub> |
| 27a   | 1.50 (1H, m)            | 27.7  | CH <sub>2</sub> | 1.53 (1H, m)             | 28.1  | CH <sub>2</sub> |
| 27b   | 1.34 (1H, m)            |       |                 | 1.43 (1H, m)             |       |                 |
| 28    | 0.92 (3H, t, 7.4)       | 12.3  | CH <sub>3</sub> | 0.95 (3H, t, 7.3)        | 12.7  | CH <sub>3</sub> |

<sup>a</sup>In acetone-*d*<sub>6</sub>, 500 MHz for <sup>1</sup>H and 125 MHz for <sup>13</sup>C NMR; Chemical shifts are reported in ppm;

All signals are determined by <sup>1</sup>H-<sup>1</sup>H COSY, HSQC, HMBC, and NOESY correlations.

**Table S10.  $^1\text{H}$  and  $^{13}\text{C}$  NMR spectroscopic Data for **8**<sup>a</sup>**

| <b>8</b> |                                        |                     |                 |
|----------|----------------------------------------|---------------------|-----------------|
| position | $\delta_{\text{H}}$ (mult., $J$ in Hz) | $\delta_{\text{C}}$ | mutl.           |
| 1        |                                        | 171.8               | C               |
| 2        | 3.94 (1H, m)                           | 49.3                | C               |
| 3        | 6.59 (1H, m)                           | 139.1               | CH              |
| 4        |                                        | 135.8               | C               |
| 4-Me     | 1.76 (3H, dd, 2.4, 1.5)                | 15.7                | CH <sub>3</sub> |
| 5        |                                        | 197.1               | C               |
| 6a       | 2.99 (1H, dd, 16.0, 1.2)               | 48.9                | CH              |
| 6b       | 2.24 (1H, m)                           |                     | CH              |
| 7        |                                        | 80.5                | C               |
| 7-OH     | 4.08 (1H, s)                           |                     | C               |
| 8        |                                        | 137.7               | C               |
| 8-Me     | 1.86 (3H, s)                           | 14.3                | CH <sub>3</sub> |
| 9        | 6.23 (1H, dd, 23.0, 10.5)              | 125.8               | CH              |
| 10       | 6.19 (1H, dd, 23.0, 10.5)              | 127.1               | CH              |
| 11       | 5.60 (1H, dd, 14.7, 10.5)              | 137.1               | CH              |
| 12       | 2.58 (1H, m)                           | 41.7                | CH              |
| 12-Me    | 1.18 (3H, d, 6.9)                      | 19.7                | CH <sub>3</sub> |
| 13       | 3.96 (1H, m)                           | 79.2                | CH              |
| 13-OH    | 3.82 (1H, d, 5.0)                      |                     |                 |
| 14       |                                        | 139.7               | C               |
| 14-Me    | 1.61 (3H, m)                           | 15.1                | CH <sub>3</sub> |
| 15       | 5.33 (1H, m)                           | 118.0               | CH              |
| 16       | 2.24 (2H, m)                           | 35.1                | CH <sub>2</sub> |
| 17       | 3.86 (1H, m)                           | 69.7                | CH              |
| 18a      | 1.83 (1H, ddd, 11.0, 4.5,              | 36.9                | CH <sub>2</sub> |

---

|       |                                |       |                 |
|-------|--------------------------------|-------|-----------------|
|       | 2.2)                           |       |                 |
| 18b   | 0.82 (1H, dd, 24.3, 11.0)      |       |                 |
| 19    | 5.20 (1H, m)                   | 69.0  | CH              |
| 20a   | 1.98 (1H, ddd, 11.9, 4.6, 2.0) | 41.6  | CH <sub>2</sub> |
| 20b   | 1.49 (1H, m)                   |       |                 |
| 21    |                                | 96.6  | C               |
| 22    | 5.72 (1H, dd, 10.0, 2.0)       | 135.9 | CH              |
| 23    | 5.56 (1H, dd, 10.0, 2.0)       | 129.5 | CH              |
| 24    | 2.25 (1H, m)                   | 31.4  | CH              |
| 24-Me | 0.90 (3H, d, 7.0)              | 16.7  | CH <sub>3</sub> |
| 25    | 3.47 (1H, dd, 10.0, 1.7)       | 75.6  | CH              |
| 26    | 1.64 (1H, m)                   | 36.0  | CH              |
| 26-Me | 0.90 (3H, d, 7.0)              | 13.3  | CH <sub>3</sub> |
| 27    | 1.47 (2H, m)                   | 28.3  | CH <sub>2</sub> |
| 28    | 0.94 (3H, t, 7.4)              | 12.3  | CH <sub>3</sub> |

---

<sup>a</sup>In acetone-*d*<sub>6</sub>, 400 MHz for <sup>1</sup>H and 100 MHz for <sup>13</sup>C NMR; Chemical shifts are reported in ppm;

All signals are determined by <sup>1</sup>H-<sup>1</sup>H COSY, HSQC, HMBC, and NOESY correlations.

**Fig. S1.** Alignment of the amino acid sequences of AveC, MilC, MeiC, and NemC. AveC (NP\_822115.1) from *S. avermectinus*; MilC (YP\_004958979.1) from *S. hygroscopicus*; MeiC (AAM97313.1) from *S. nanchangensis*; NemC (BAF85840.1) from *S. cyaneogriseus* ssp. *Noncyanogenus*.

```

aveC MNPSEPLGLPNERNVVDTRPSDATLSPEAGLNRS GALPRELLSLPVVVWAGVGLLFTALQA
milC -----MTDLVDEDR---PEAVGRADTVRGLRVFTLPVTLWACVGALVGLQV
meiC -----MTDLVDEDR---PEAVGRADTVRGLRVFTLPVTLWACVGALVGLQV
nemC -----MLGWAALGAVCTALQA

aveC YVFSRWAADGGYRLIETAGQGQGGSKDTGTTDVVYEPVISVVCITAAAWLFRRCRVERRL
milC YVFAAWLADSGYR-IGKAPPARGGGDSERIADVLIPLLSVVGAVVLAVCLYRRCRARRRL
meiC YVFAAWLADSGYR-IEKASPARGGGDSERIADVLIPLLSVVGAVVLAVCLYRRCRARRRL
nemC YVLVRWAADGGYRLVDVPGRAARSVATEEVLDIVFPALSAAGVVGLALWL YRRCRARRRV

aveC LFDALLFLGLLFASWQSPLMNWFHSLVLSNASVWGAVGSWGPYPGWQAGAGPAEAEMLPL
milC TFDALLFLGLLSASWQSPLMNWINPVLASN NVN VFGAVASWGPYPGWQAGAGHQAELPL
meiC TFDASLFLGLLSASWQSPLMNWINPVLASN NVN VFGAVASWGPYPGWQAGAGHQAELPL
nemC SFDALLFAGVLFAGWLSPLMNWFHSLVLSNTHVWGAVGSWGPYTPGWQGSAPGMEAEMLPL

aveC ASASVCMSALIVTVLCSKALGWIKARREAWRTWRLVLA VFFIGIVLGLSEPLPSASCISV
milC ATLSICMTAMMAAVACGKGMGLAAARWRLGPFVRLIALGFLLVLLDIAEPLVSFAGVSV
meiC ATLSICMTAMMAAVACGKGMGLAAARWRLGPLRLIALGFLLVLLDIAEPLVSFAGVSV
nemC VTFSVCSTALLGVLAACHVLSRVRDRWEGVRPWQLIGVAVATAVALDLSEPAISLIGLSV

aveC WARALPEVTLWSGEWYQFPVYQAVGSGLVCCMLGSLRFFRDERDESWVERGAWRLPQRAA
milC WTRAVPELTIWSGHWYQFPPLYQMVASALFGASLGAARHFRNRRGETCLES GAAL LPEGPR
meiC WTRAVPELTIWSGHWYQFPPLYQMVASALFGASLGAARHFRNRRGETCLES GTAL LPEGPR
nemC WSKALPEVSLWSGAWYQFPPLYQLLTAALASGLLSALRFFRDERDET LVERGAWRLPGRVR

aveC NWARFLAVVGGVNAV MFLYTCFHLLSLVGGQPPDQLPDSFQAPAA Y
milC PWVRLLAVVGGANISIALYTG AHTLFS LMDGAPPDRLPEFFRPAAGY
meiC PWVRLLAVVGGANISIALYTG AHTLFS LMDGAPPDRLPEFFRPAAGY
nemC LWARFLAVVGGVHVVMGGYTALHVL LSLVGGQPPDALPGFFRPPAGH

```

**Fig. S2.** Spontaneous conversions of the unstable products **2** (approx. 21.0  $\mu$ M, A), **2'** (approx. 13.9  $\mu$ M, B), **3** (approx. 7.2  $\mu$ M, contaminated with a trace of **2'**, C) and **7** and **7'** (approx. 1.7 mM, D). Each HPLC fraction was prepared from the culture broth of the *AaveDC* double mutant strain VL1002 by the method described in Supplementary Method. For **2**, **2'** or **3**, the conversion was performed at 4 °C. For **7** and **7'**, the conversion was carried out at 25 °C. The concentration of each compound was estimated according to a UV-absorbance curve of AVE-B2a varying in concentration.

**A**

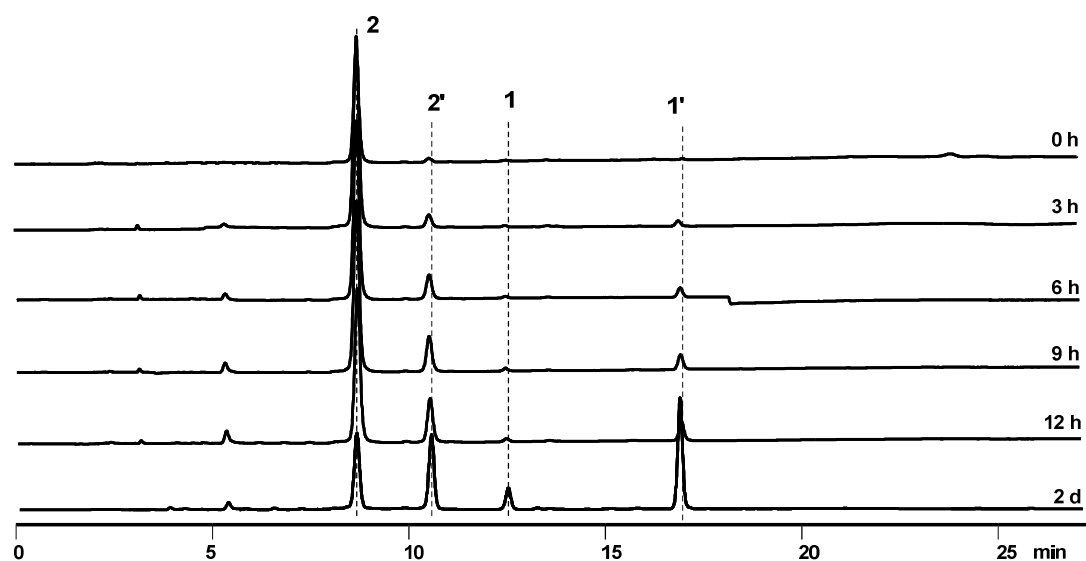

**B**

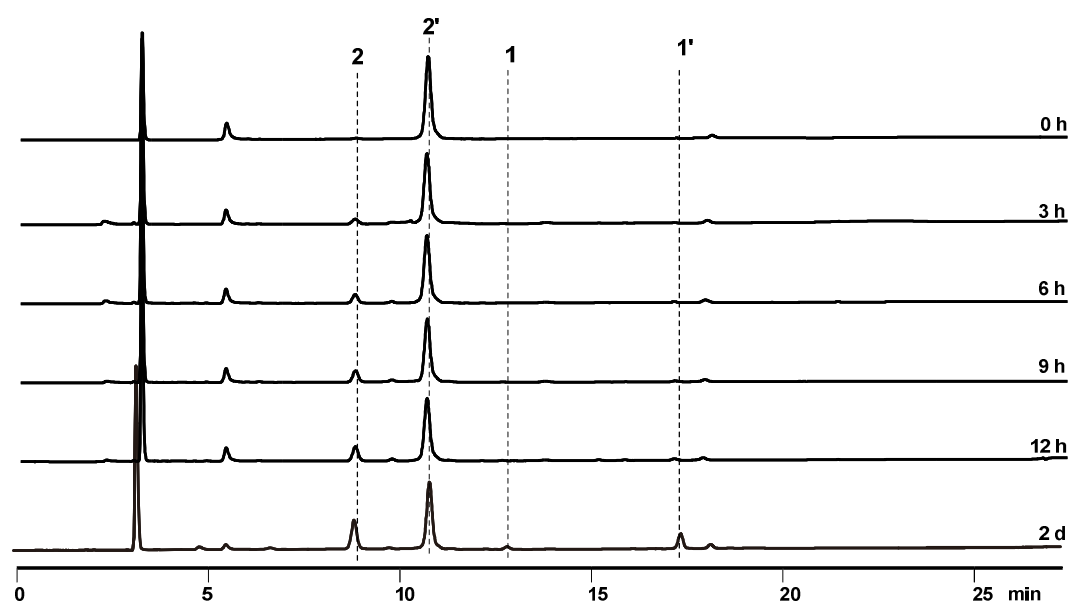

C

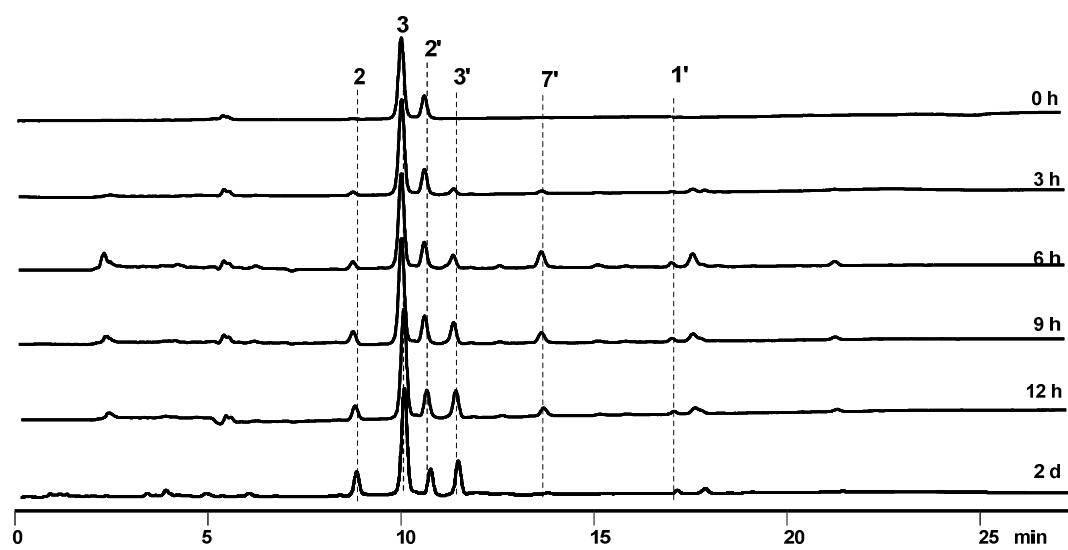

D

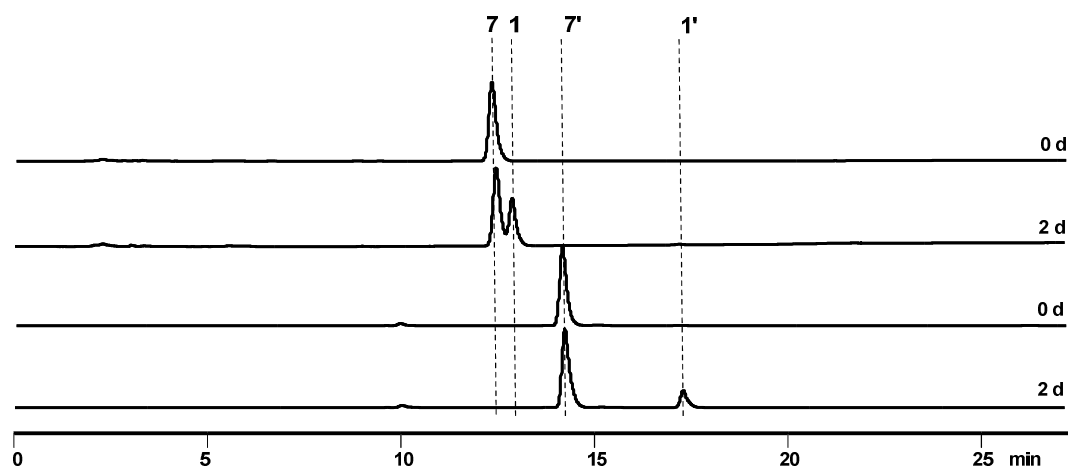

**Fig. S3.** SDS-PAGE analysis of the proteins in the recombinant *E. coli* strain VL2001. Lane 1, without IPTG induction; Lane 2, with IPTG induction; and Lane 3, the supernatant of lysate from lane 2.

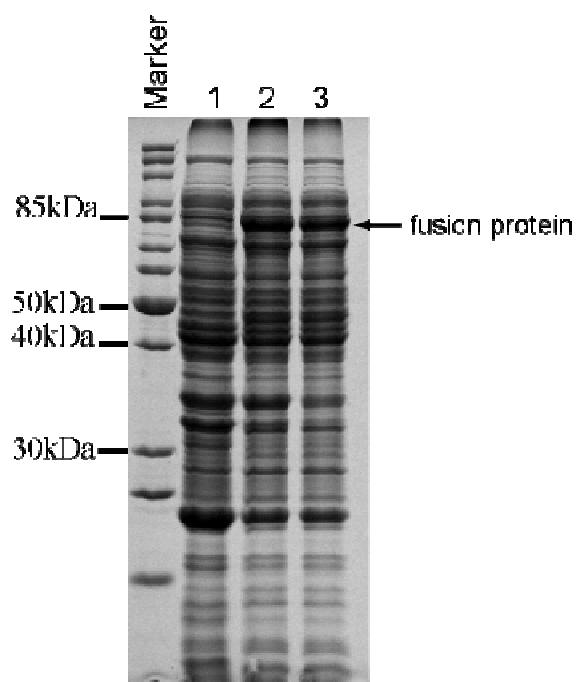

**Fig. S4.** Time course analysis of MBP-MeiC-catalyzed biotransformation *in vitro*, at 0.1 h, 0.5 h, and 1.0 h. (A) Cell free extract of VL2001 with MBP-MeiC production. (B) Cell free extract of VL2001 without MBP-MeiC production.

**A**

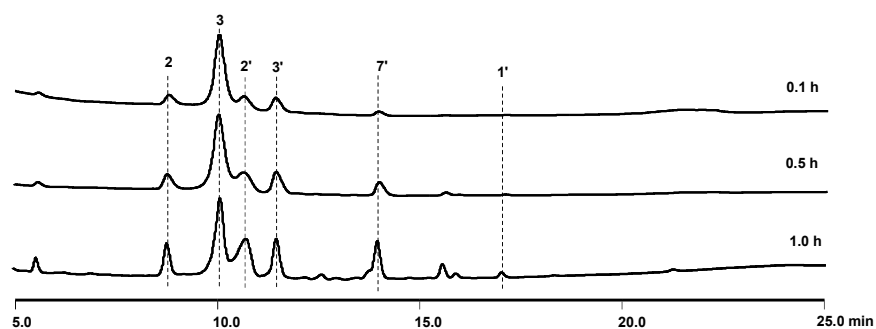

**B**

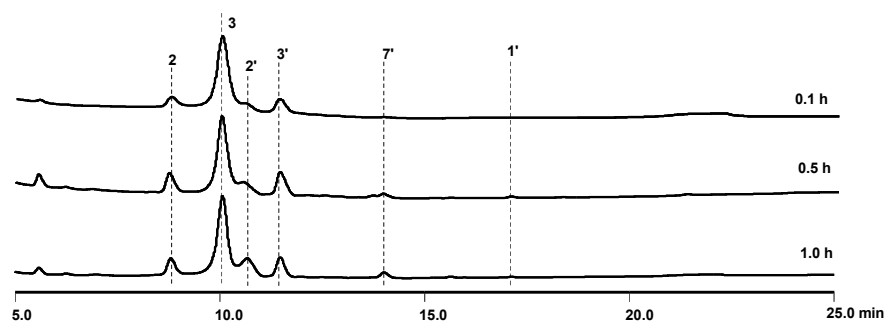



**Fig. S5.** Construction of *S. avermectinius* mutant strains, including VL1001 (A), VL1004 (B), VL1002 (C), VL1005 (D), and VL1008 (E), and their genotypes verification. The PCR primers are labeled with their predicted fragment sizes

**A.** Construction of VL1001 (top) and genotype validation with the DNA marker (Lane 1) by PCR amplification (below) of the genomic DNAs from VL1001 (Lane 2), wild type strain (Lane 3), and single crossover mutant for VL1001 generation (Lane 4). The resulting PCR products from wild type strain (Lane 5), VL1001 (Lane 6) and the single crossover mutant (Lane 7) were individually digested by HindIII.

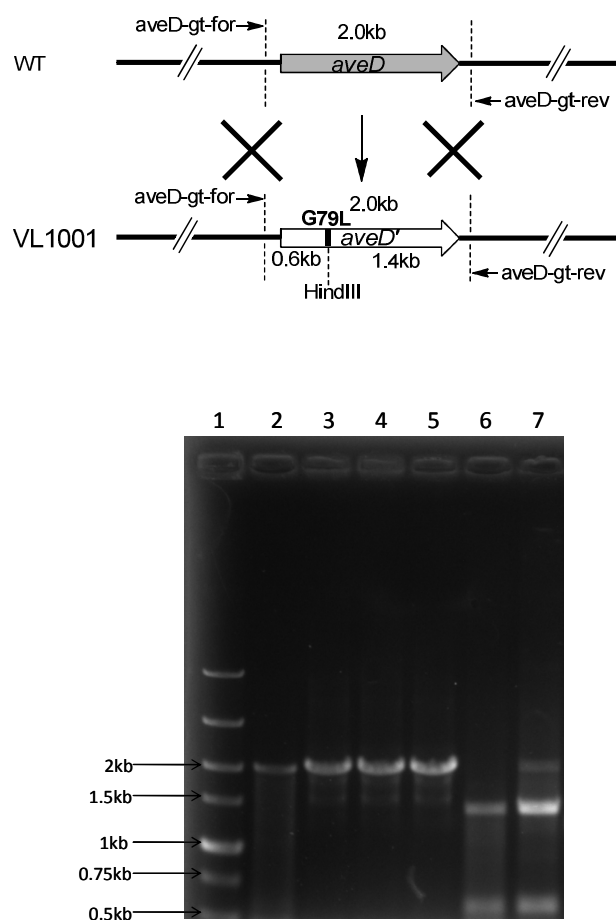

**B.** Construction of VL1004 (top) and genotype validation by PCR amplification (below) of the genomic DNAs from VL1001 (Lane 1), VL1004 (Lane 2), and single crossover mutant for VL1004 generation (Lane 3). Lane 5, DNA marker.

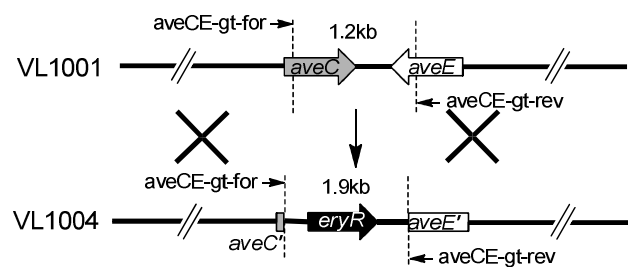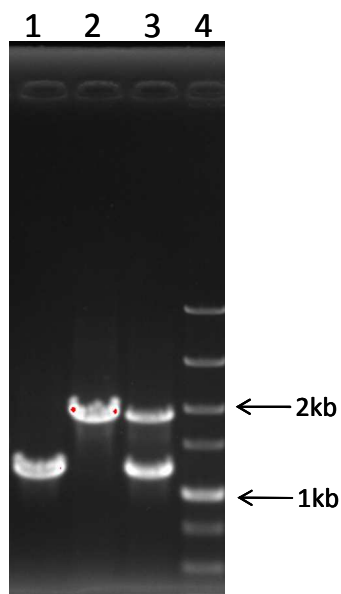

C. Construction of VL1002 (top) and genotype validation with the DNA marker (Lane 1) by PCR amplification (below) of the genomic DNAs from VL1004 (Lanes 2-3), VL1002 (Lanes 4-5), single crossover mutant for VL1002 generation (Lane 6), and wild type strain (Lane 7).

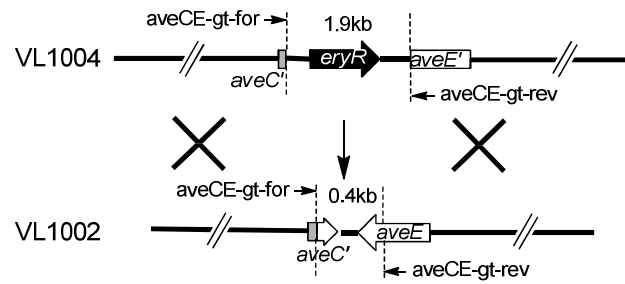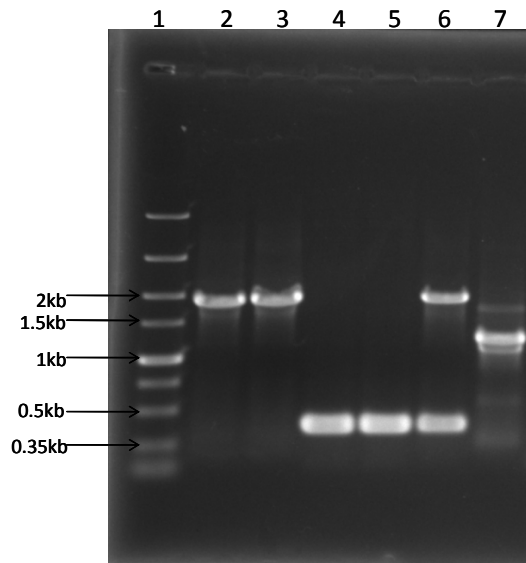

**D.** Construction of VL1005 (top) and genotype validation with the DNA marker (Lane 1) by PCR amplification (below) of the genomic DNAs from wild type strain (Lanes 2-3), VL1005 (Lanes 4-5), and single crossover mutant for VL1005 generation (Lane 6). The PCR products from VL1005 (Lane 8) and the single crossover mutant were individually digested by KpnI.

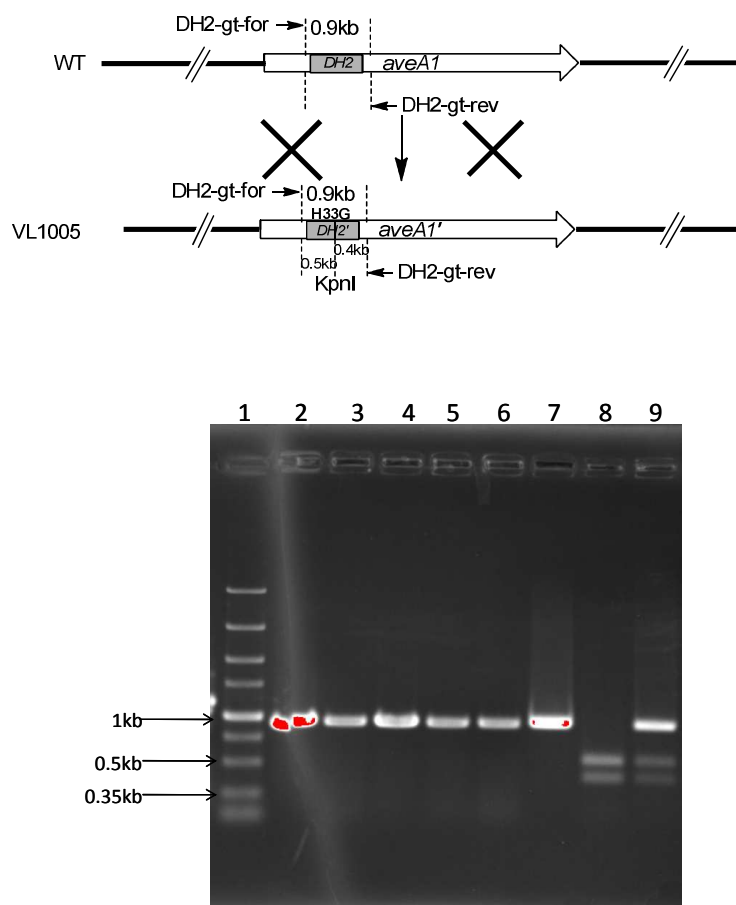

**E.** Construction of VL1008 (top) and genotype validation with the DNA marker (Lane 1) by PCR amplification (below) of the genomic DNAs from VL1008 (Lanes 2-3) and single crossover mutant for VL1008 generation (Lane 4). The recombinant plasmid pVL1019 (Lane 5) serves as the positive control.

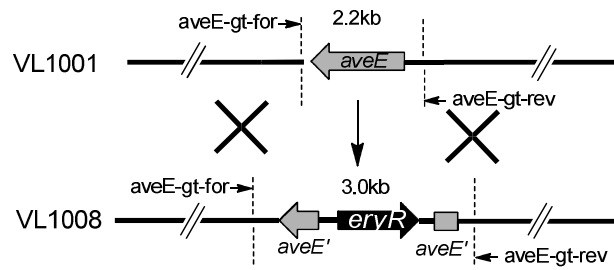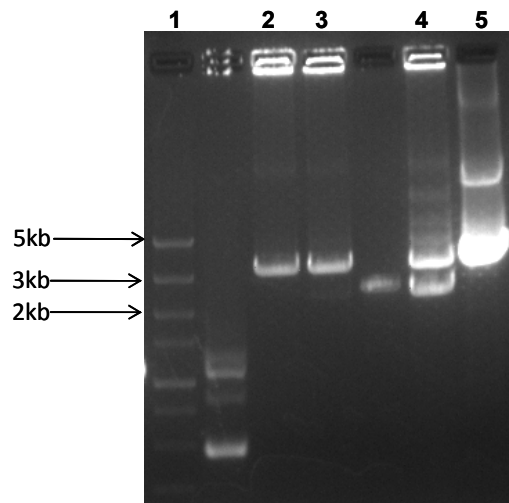

**Fig. S6.** NMR spectra of compound **1**. (A)  $^1\text{H}$  spectrum. (B)  $^{13}\text{C}$  spectrum. (C) HMQC spectrum. (D) HMBC spectrum. (E) NOESY spectrum.

**A**

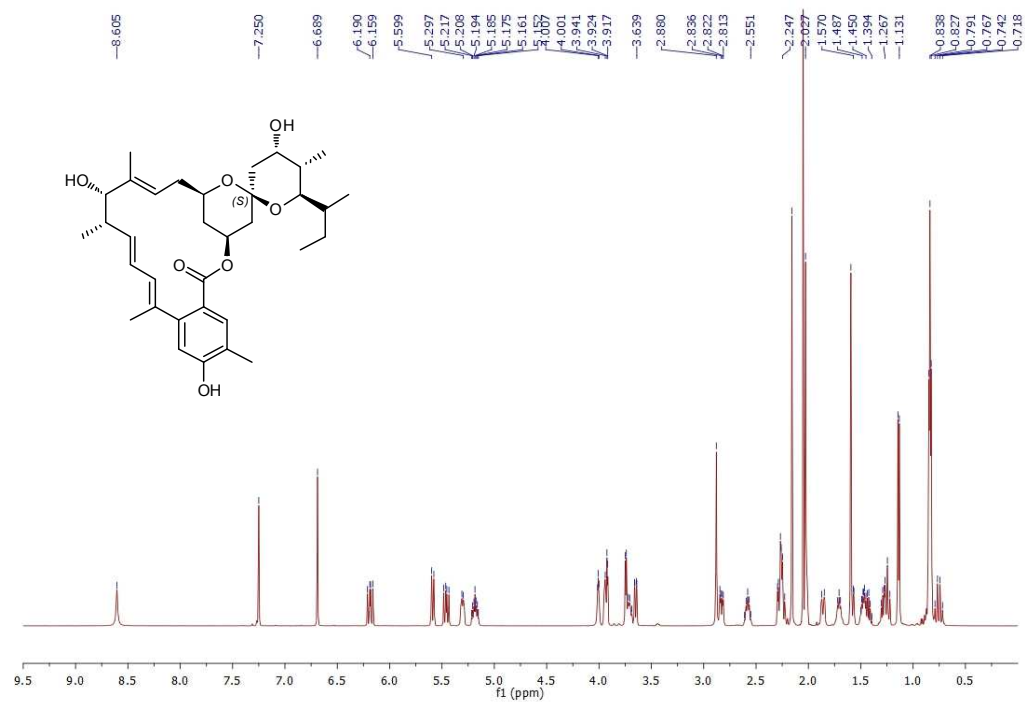

**B**

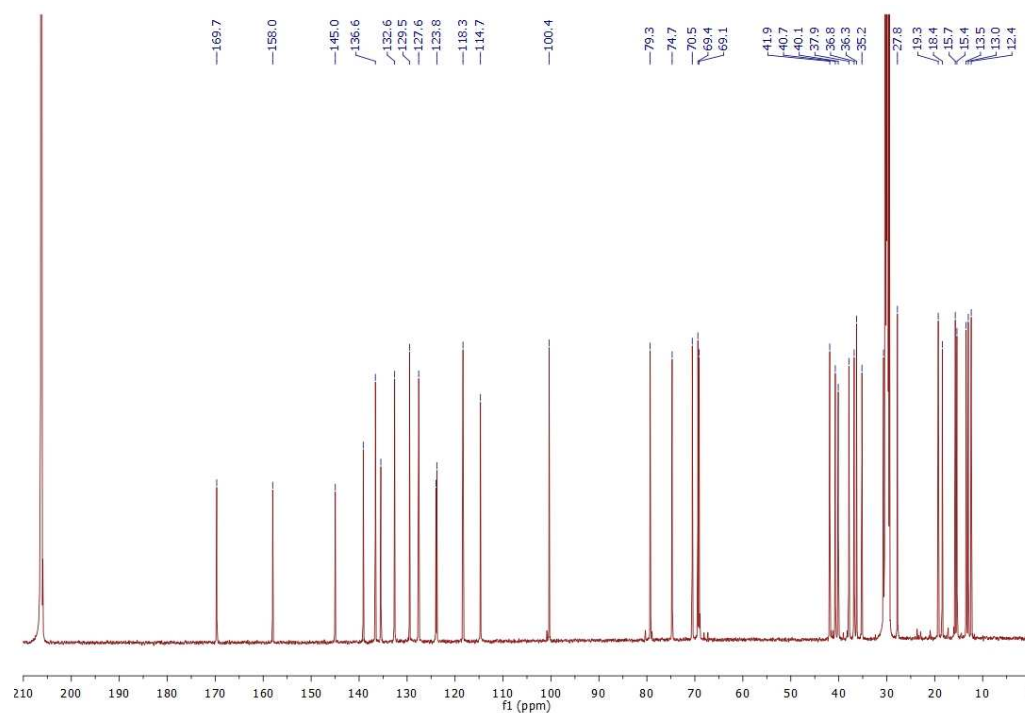

**C**

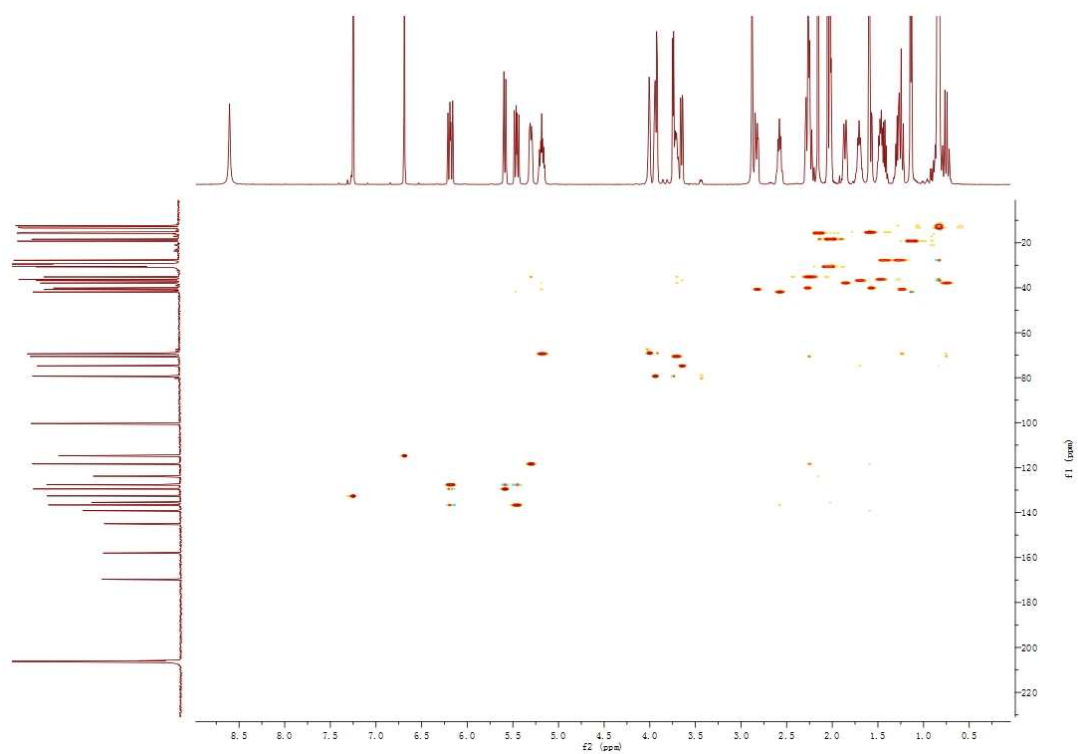

**D**

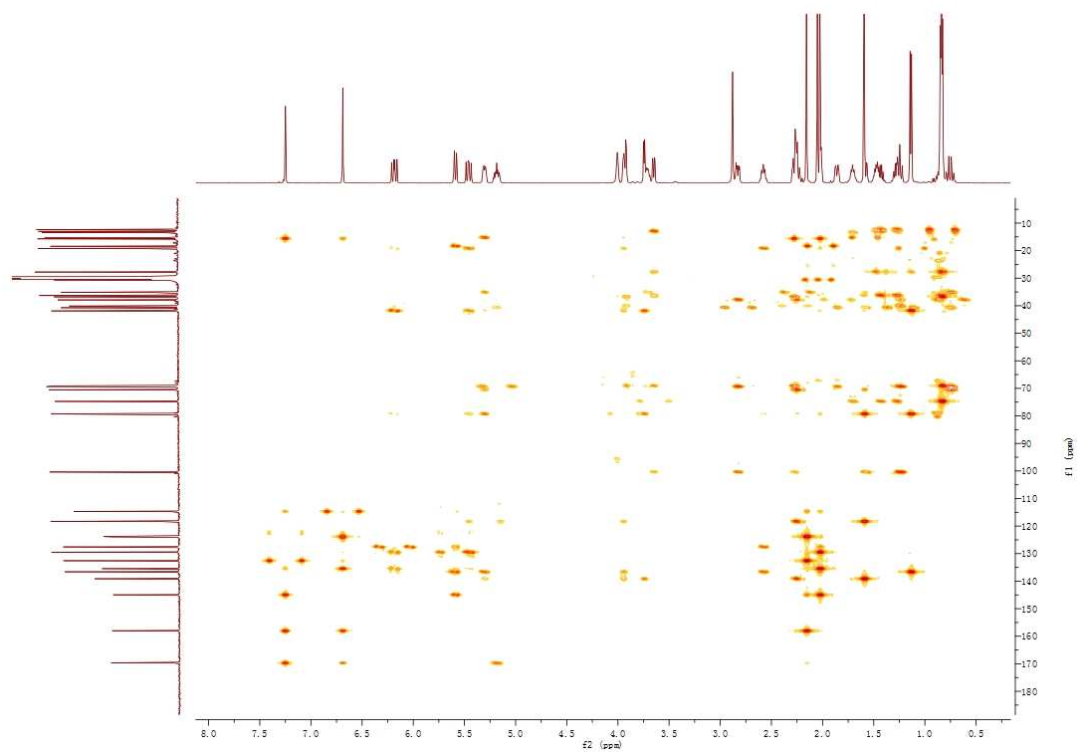

**E**

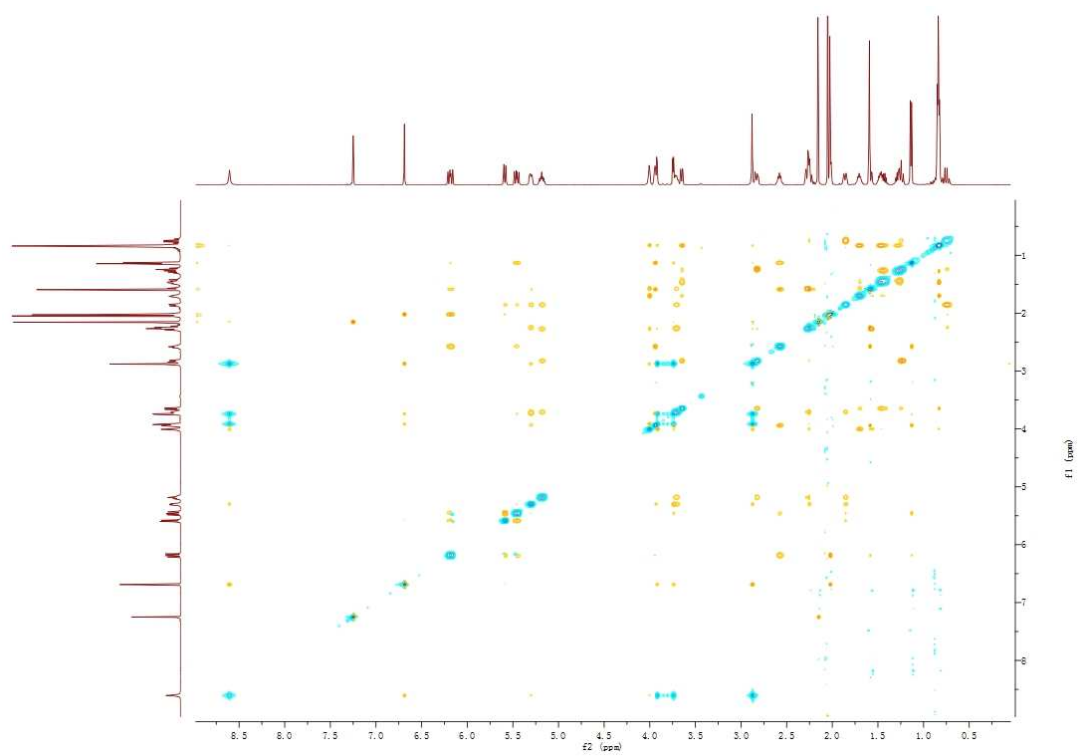



**Fig. S7.** NMR spectra of compound **1'**. (A)  $^1\text{H}$  spectrum. (B)  $^{13}\text{C}$  spectrum. (C) HMQC spectrum. (D) HMBC spectrum. (E) NOESY spectrum.

**A**

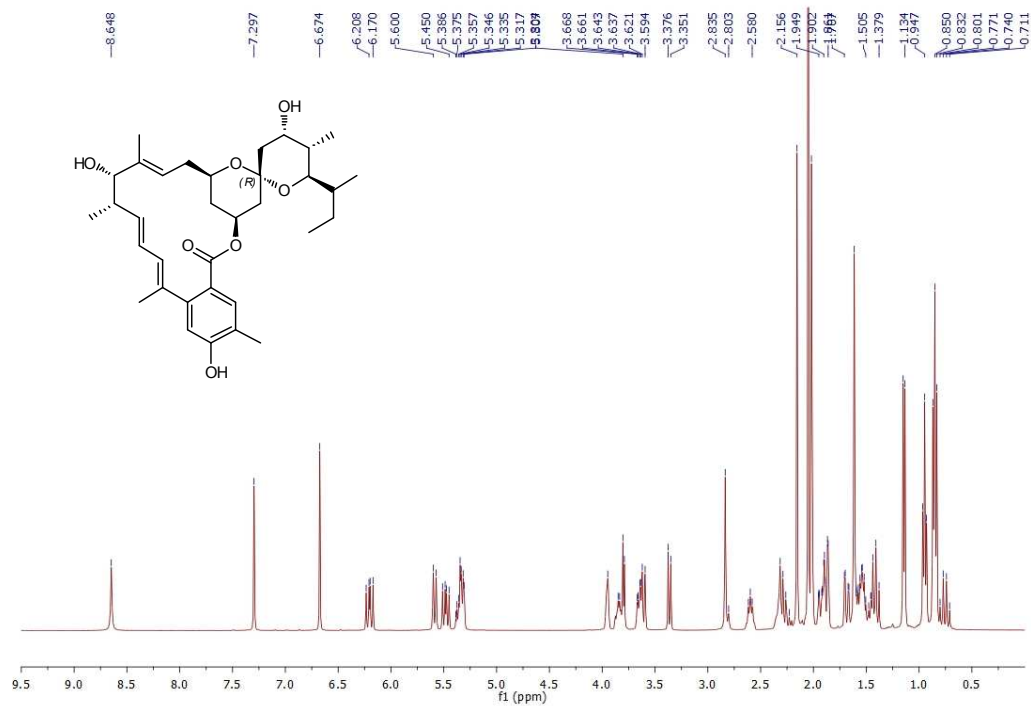

**B**

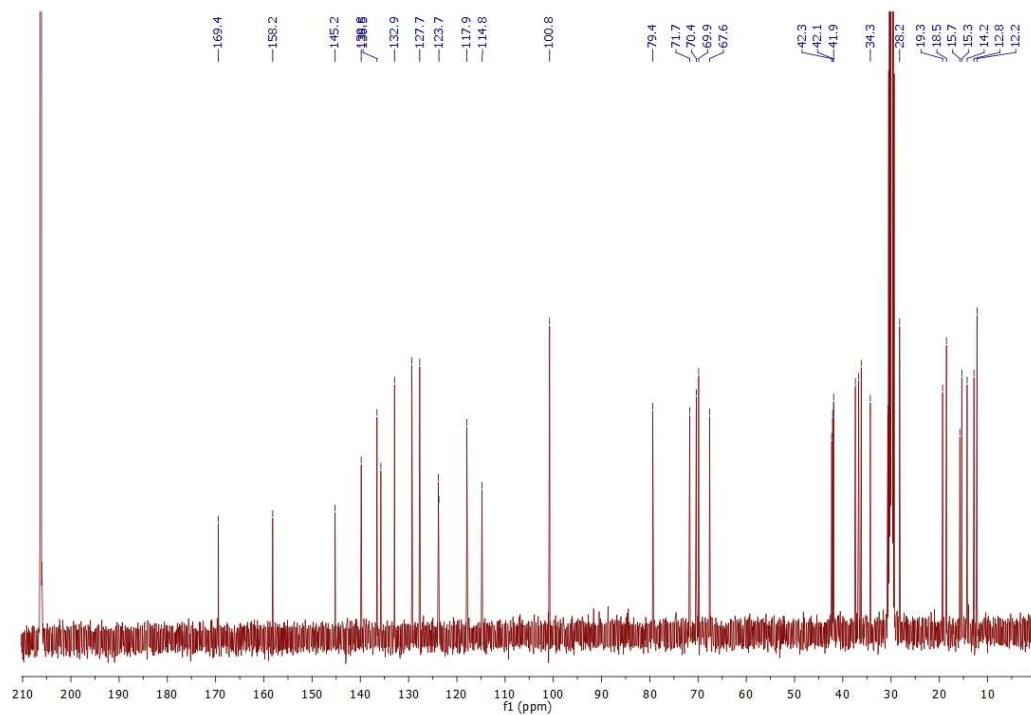

**C**

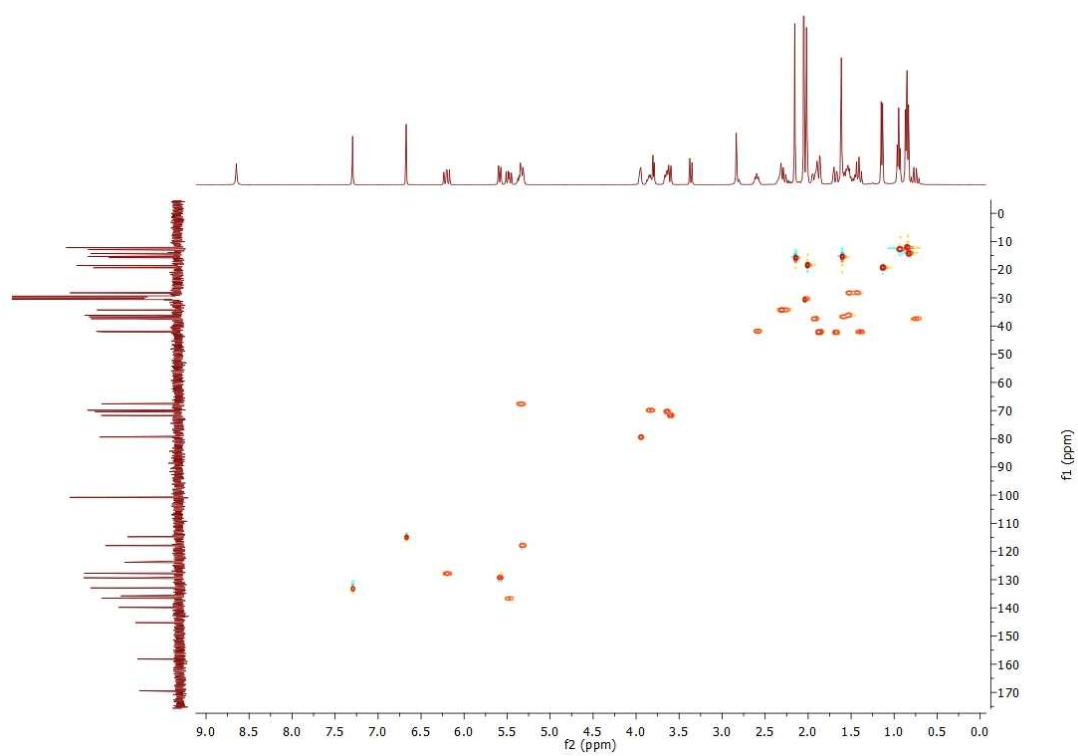

**D**

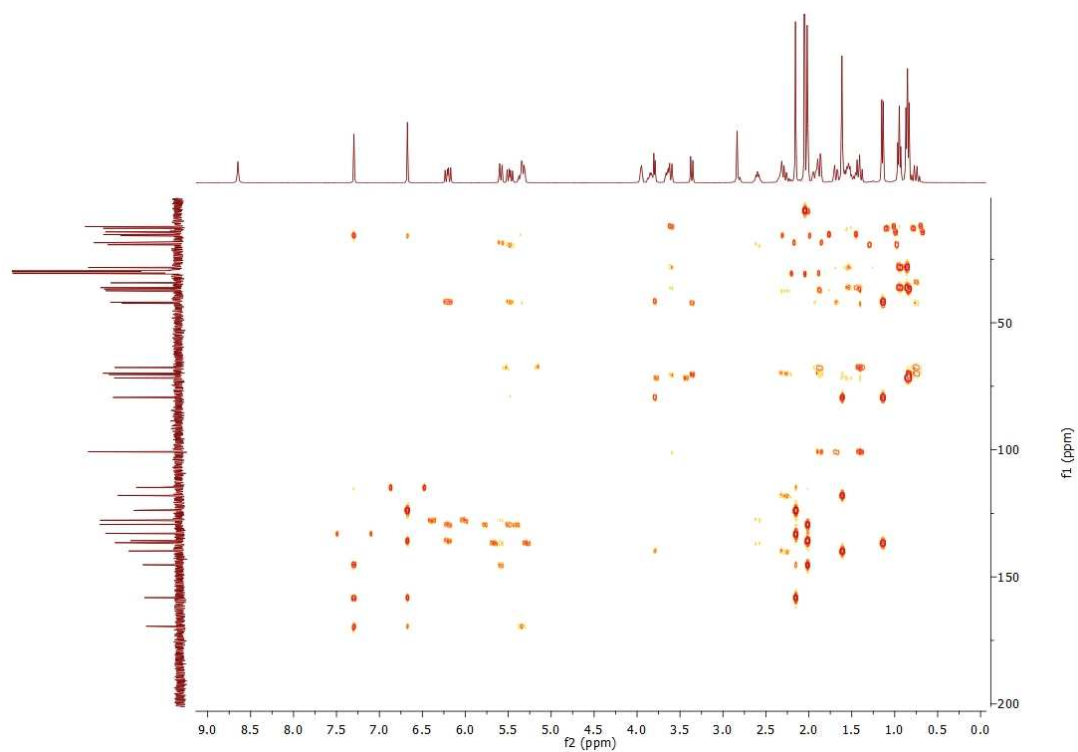

**E**

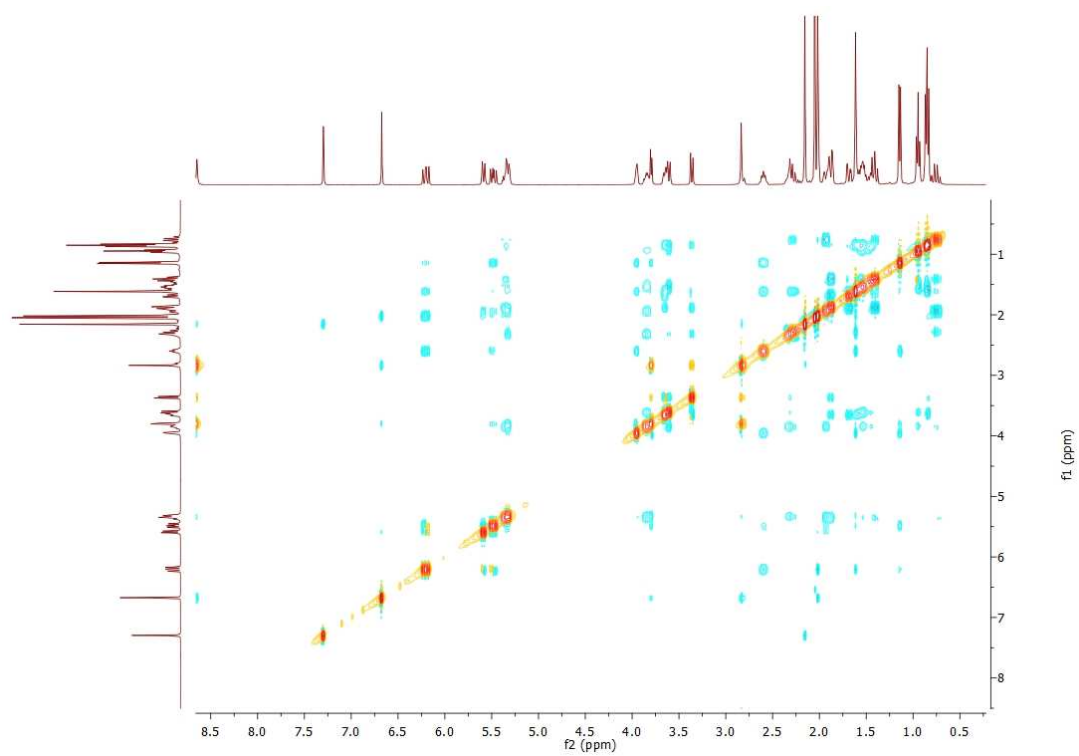

**Fig. S8.** NMR spectra of compounds **2** and **2'**. (A)  $^1\text{H}$  spectrum (with a ratio around 2 : 1 according to the signal intensity shown in the chart). (B)  $^{13}\text{C}$  spectrum (signals for **2'** are labeled by asterisk). (C) HMQC spectrum. (D) HMBC spectrum. (E) NOESY spectrum.

**A**

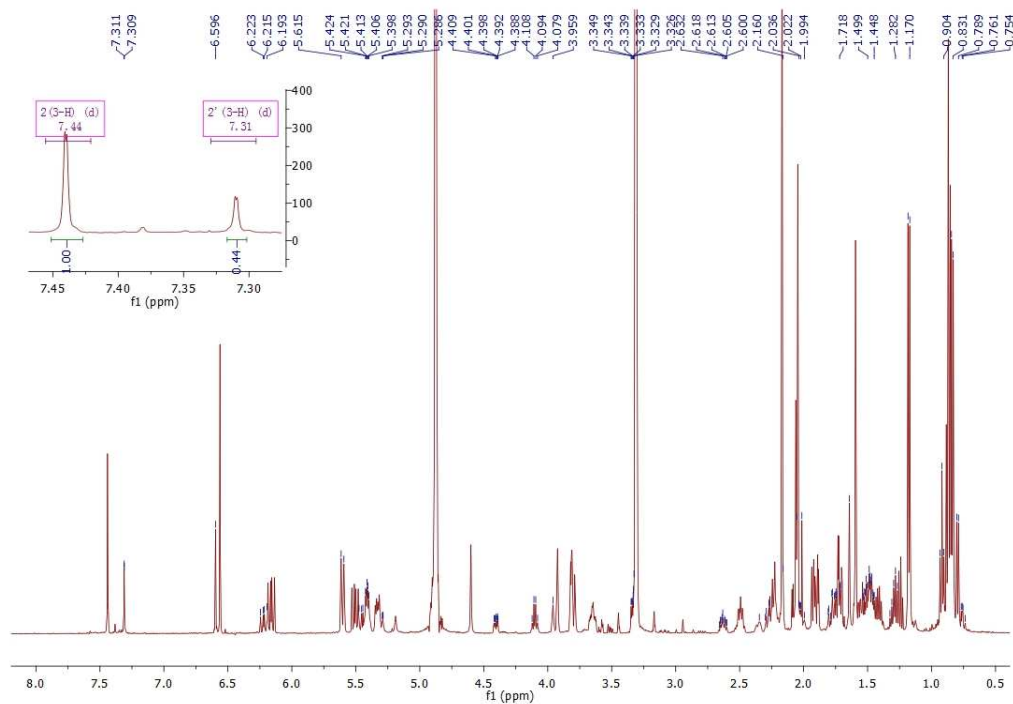

**B**

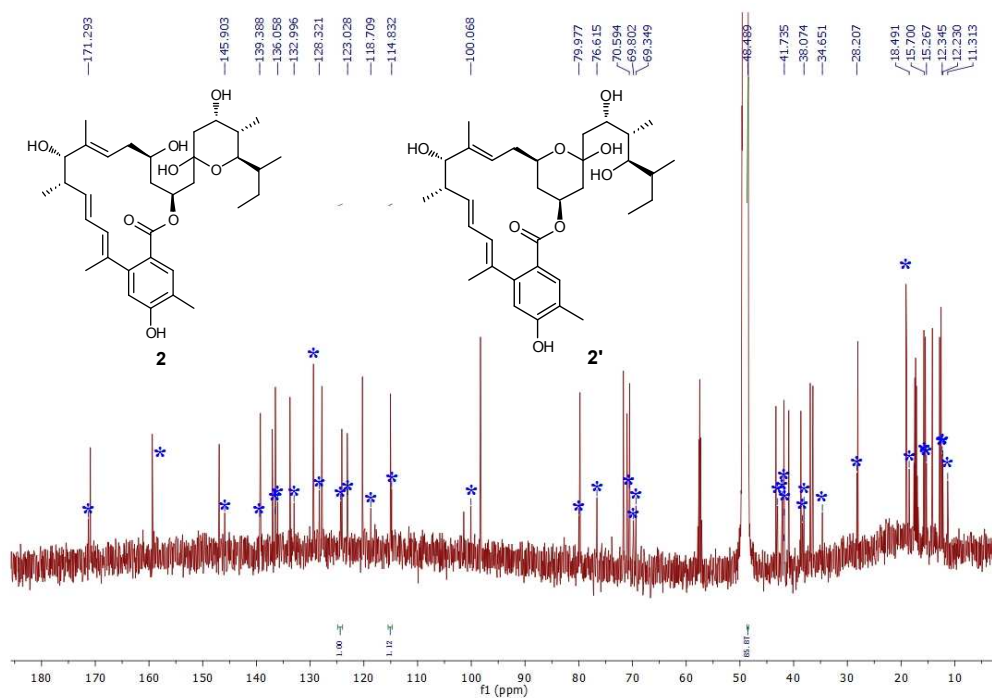

**C**

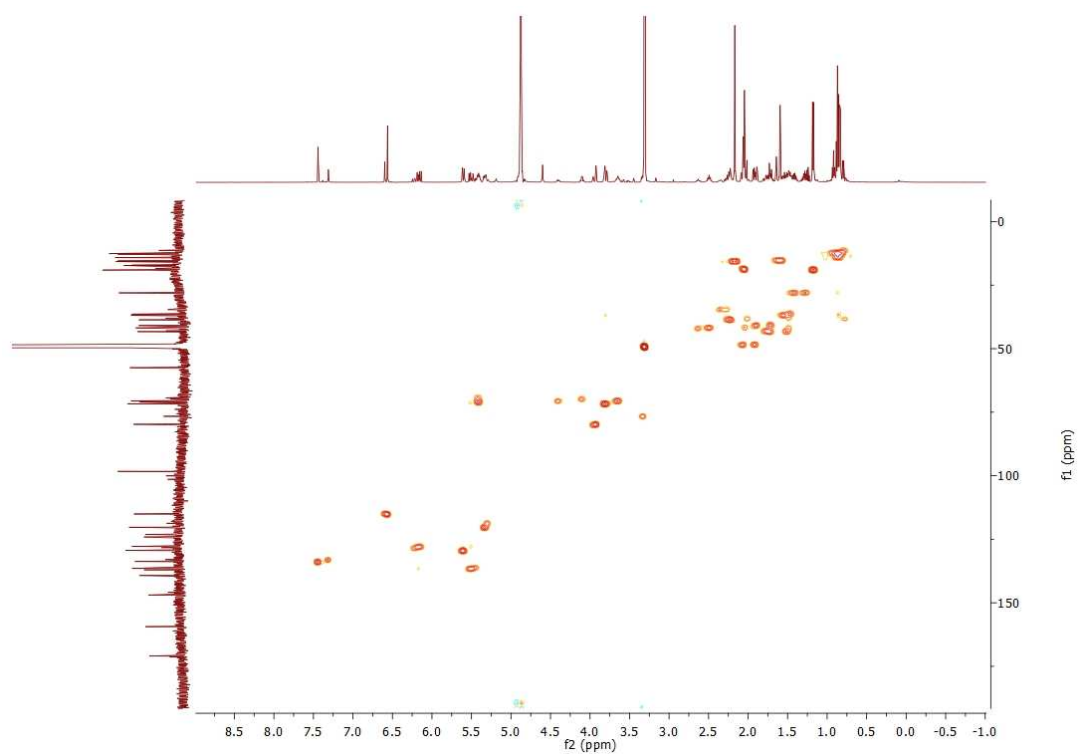

**D**

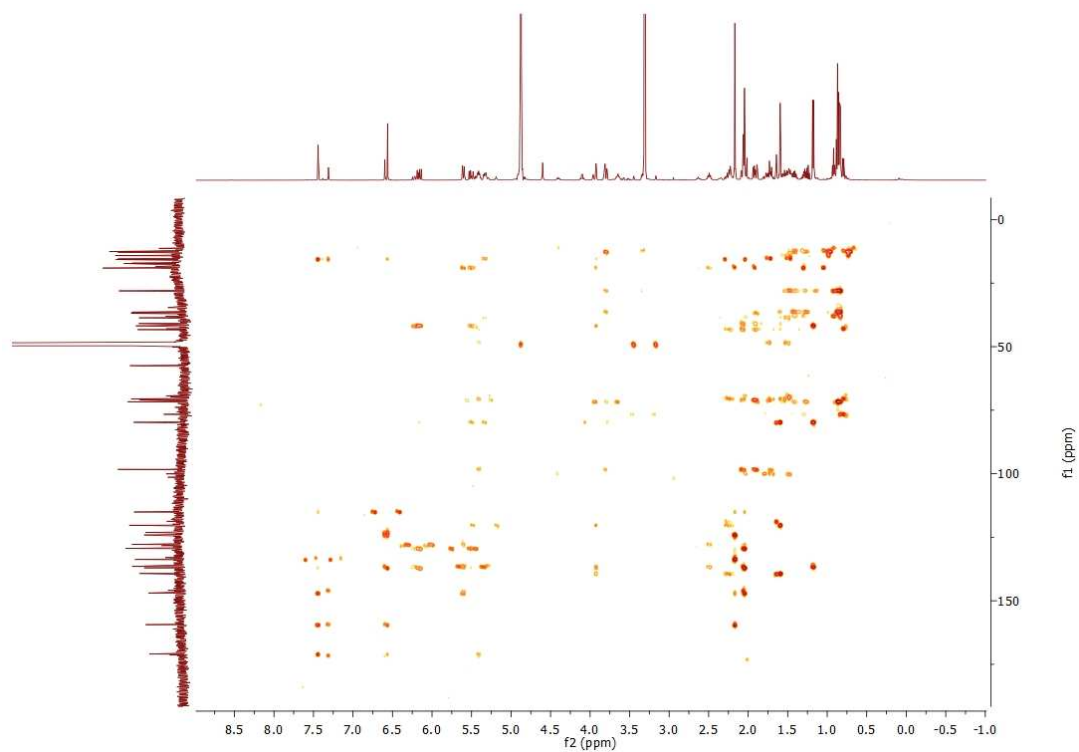

**E**

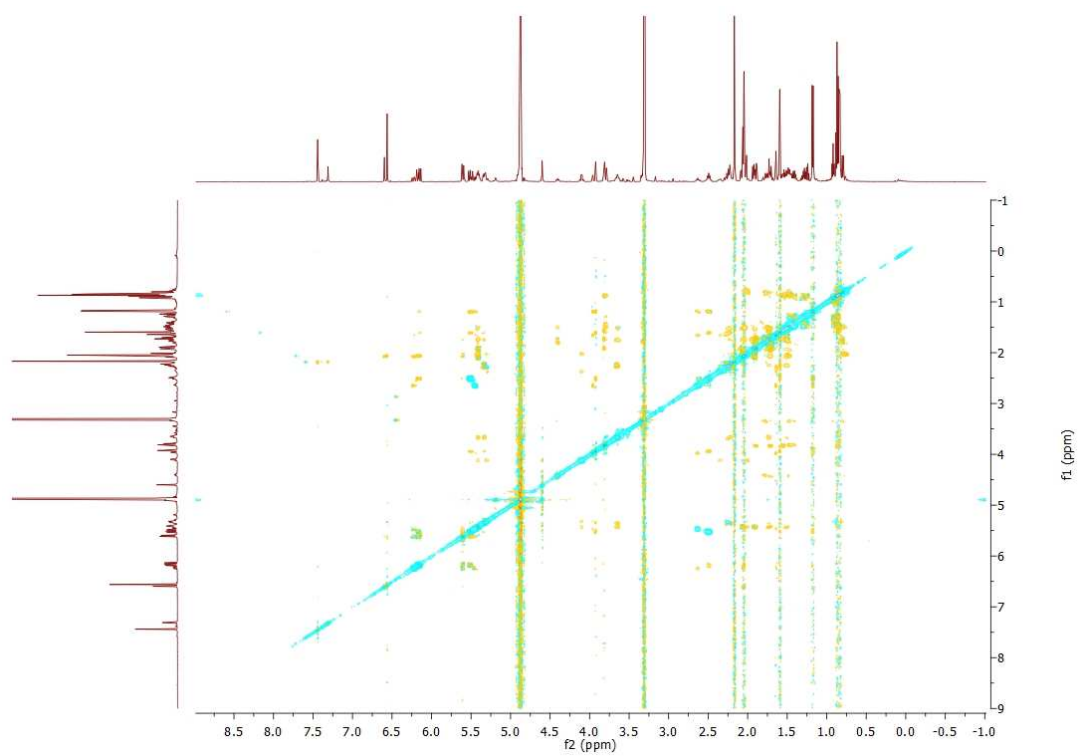

**Fig. S9.** NMR spectra of compound **4**. (A)  $^1\text{H}$  spectrum in acetone- $d_6$ . (B)  $^{13}\text{C}$  spectrum in acetone- $d_6$ . (C)  $^{13}\text{C}$  spectrum in methanol- $d_4$ .

**A**

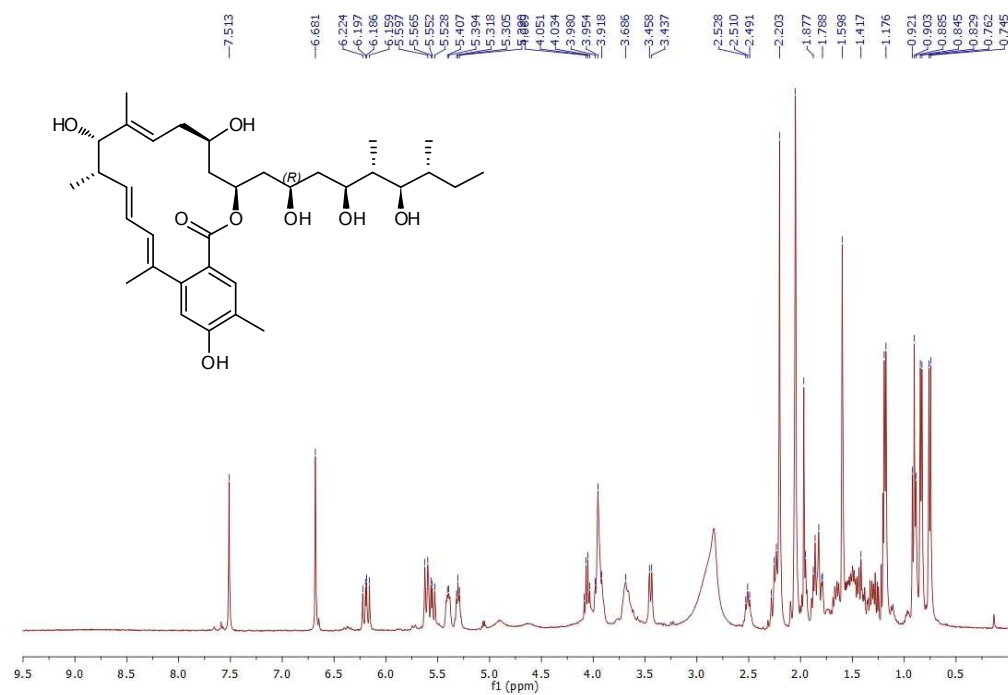

**B**

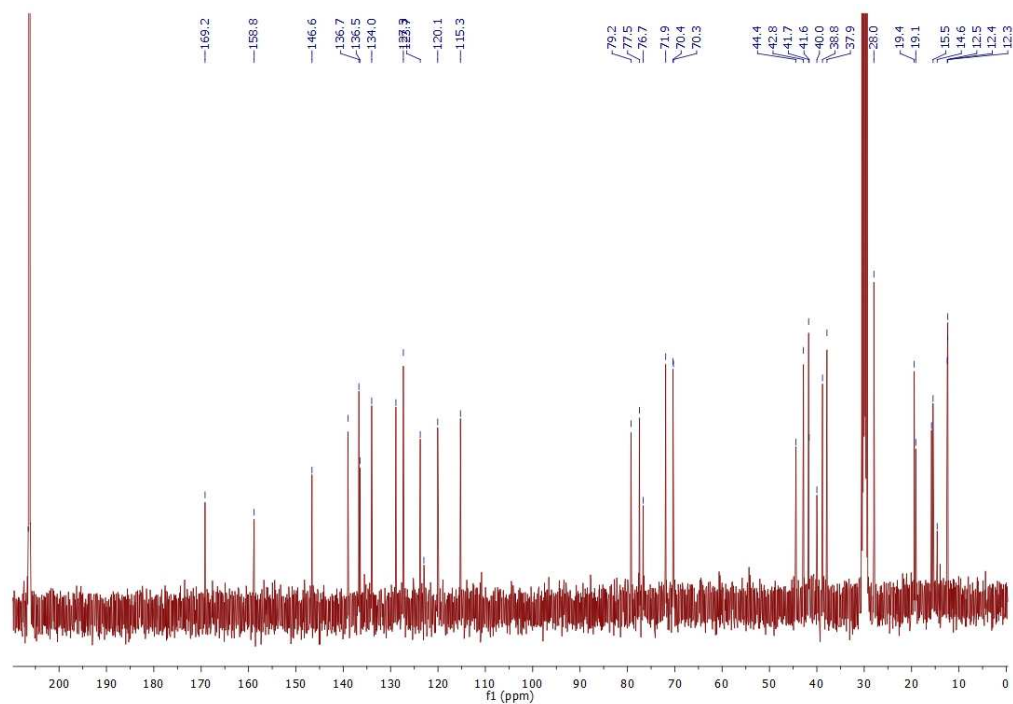

C

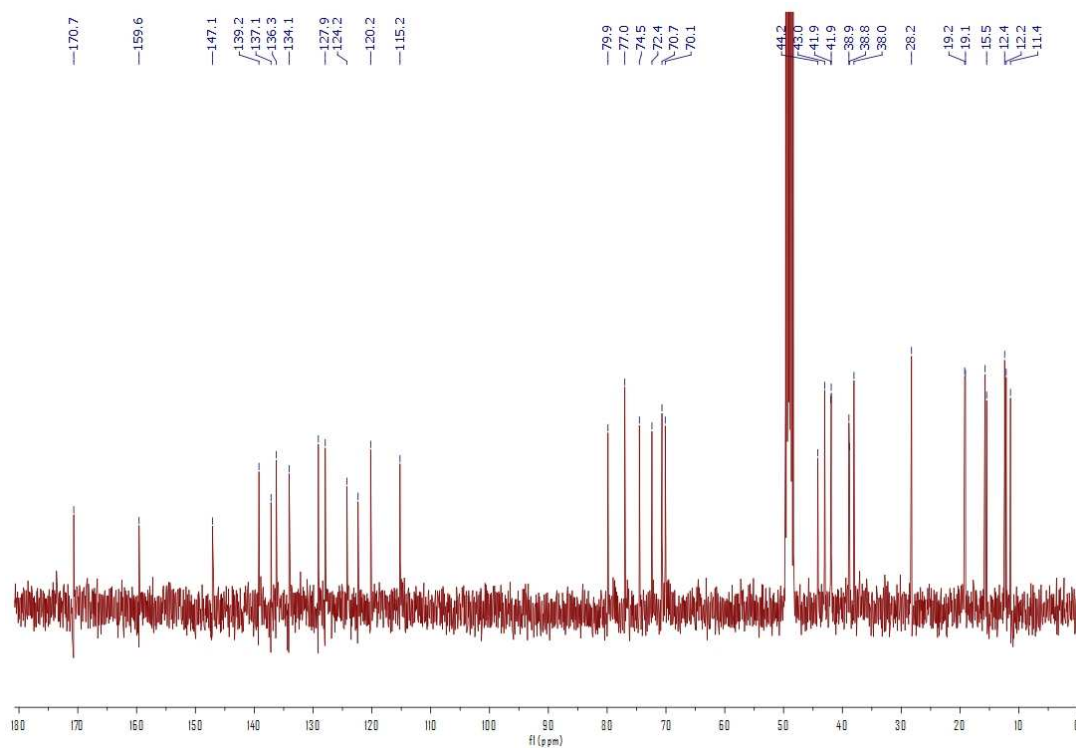



**Fig. S10.** NMR spectra of compound **4'**. (A)  $^1\text{H}$  spectrum in acetone- $d_6$ . (B)  $^{13}\text{C}$  spectrum in acetone- $d_6$ . (C)  $^{13}\text{C}$  spectrum in methanol- $d_4$ .

**A**

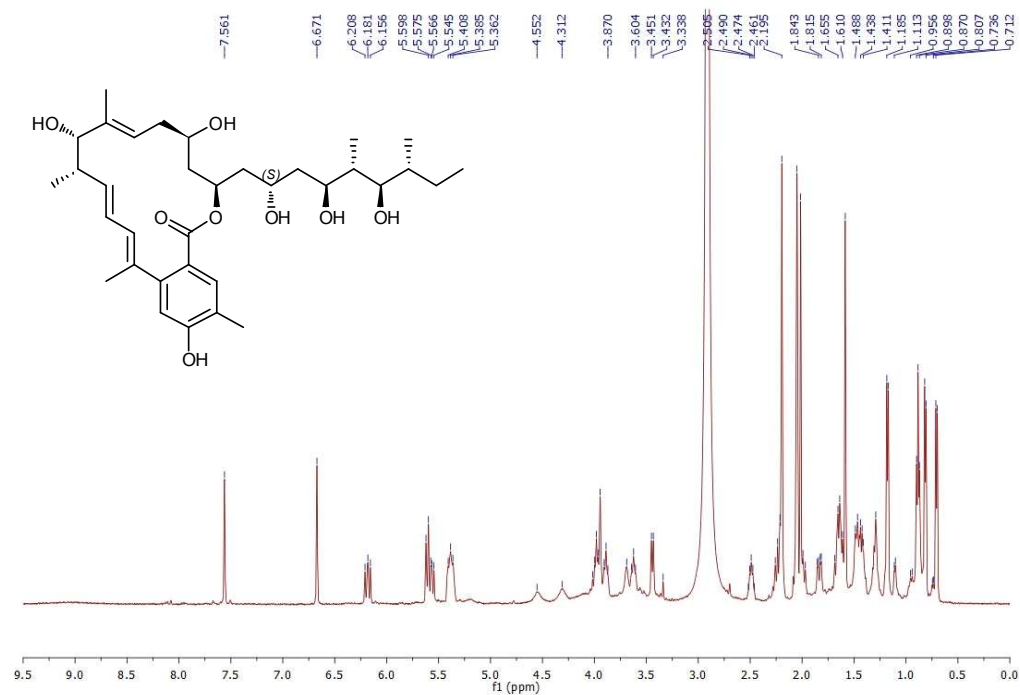

**B**

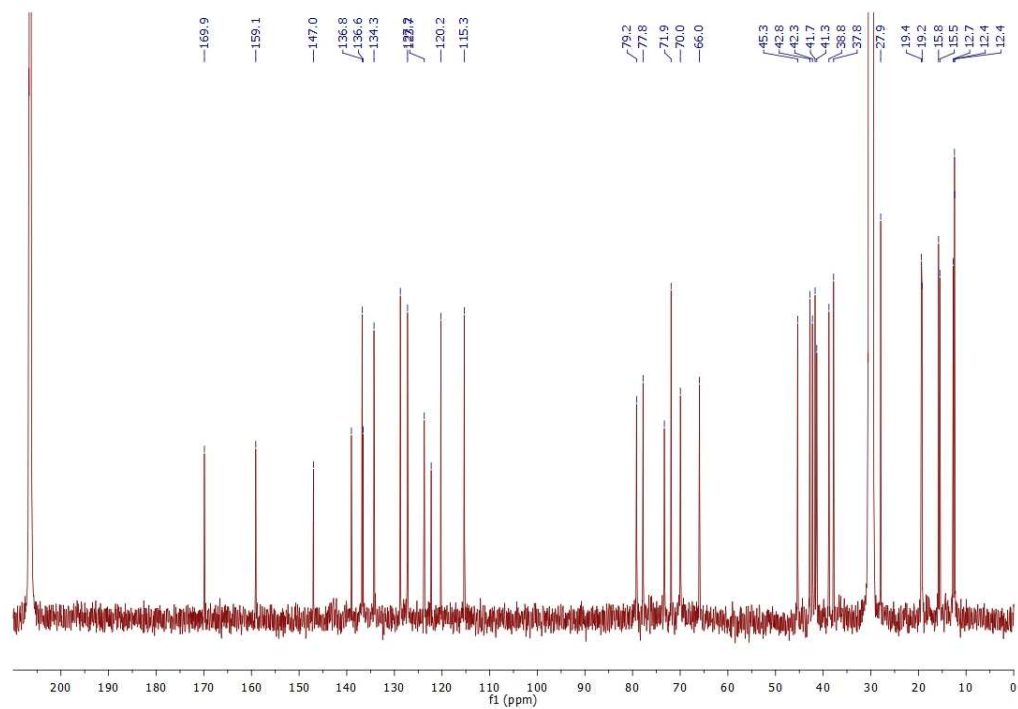

C

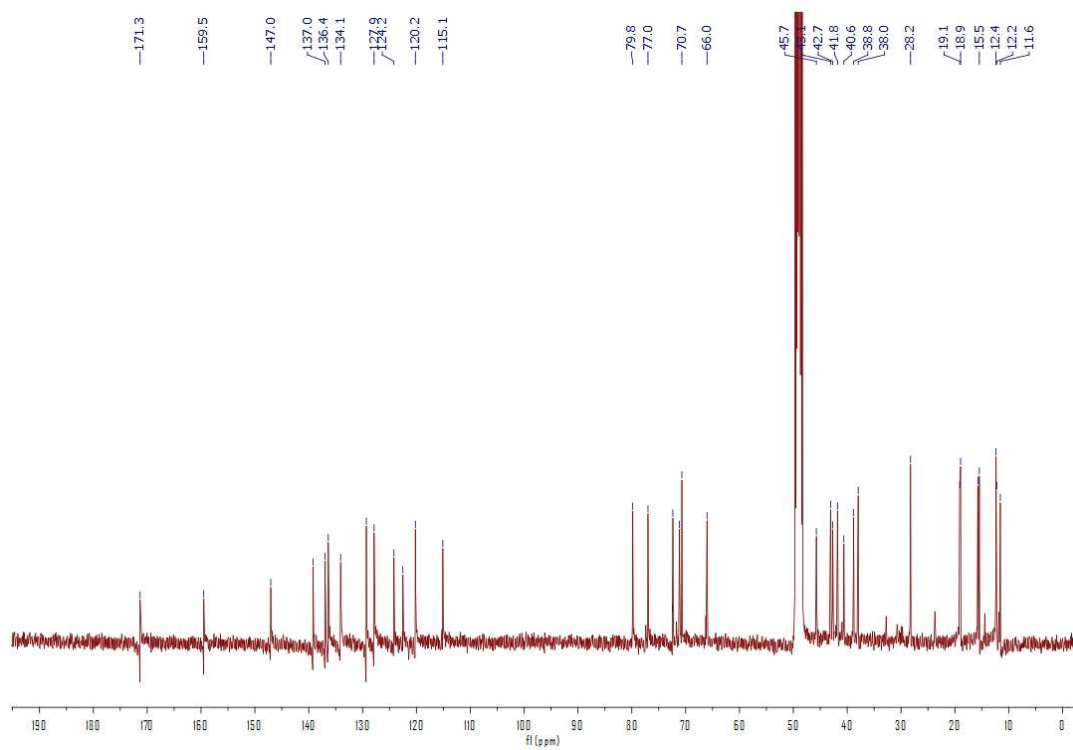

**Fig. S11.** NMR spectra of compound **5**. (A)  $^1\text{H}$  spectrum. (B)  $^{13}\text{C}$  spectrum. (C) HMQC spectrum. (D) HMBC spectrum. (E) NOESY spectrum.

**A**

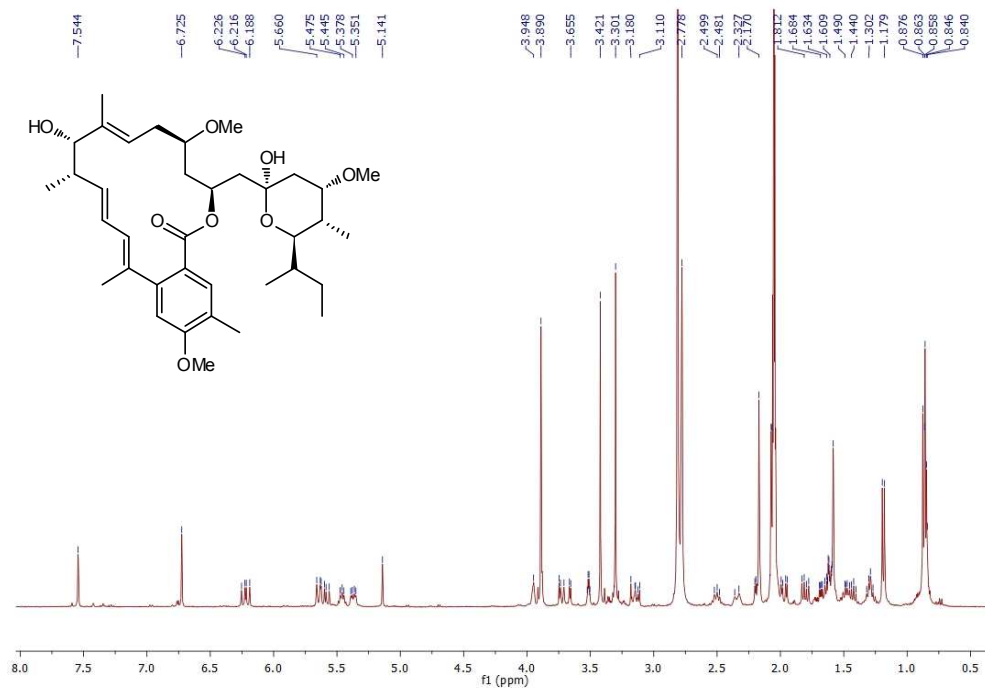

**B**

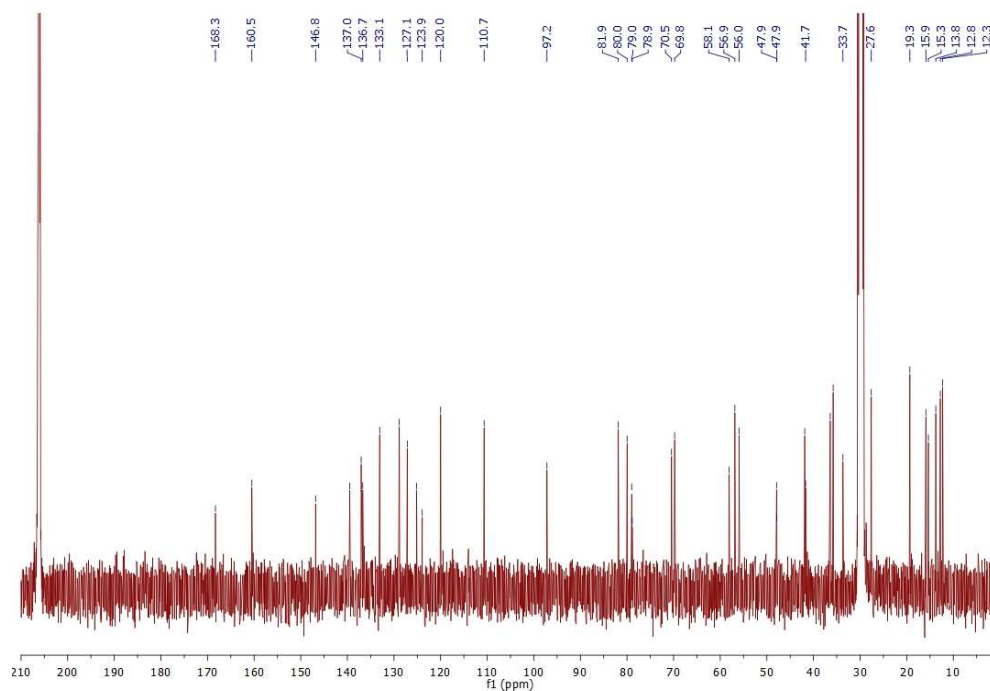

**C**

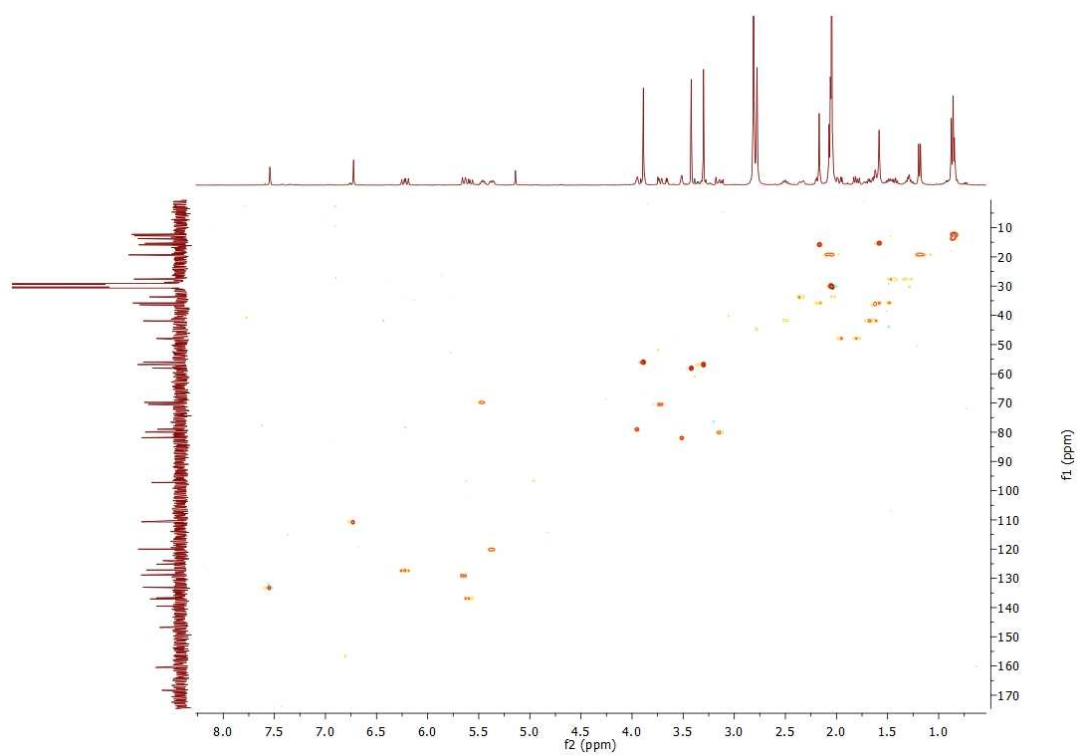

**D**

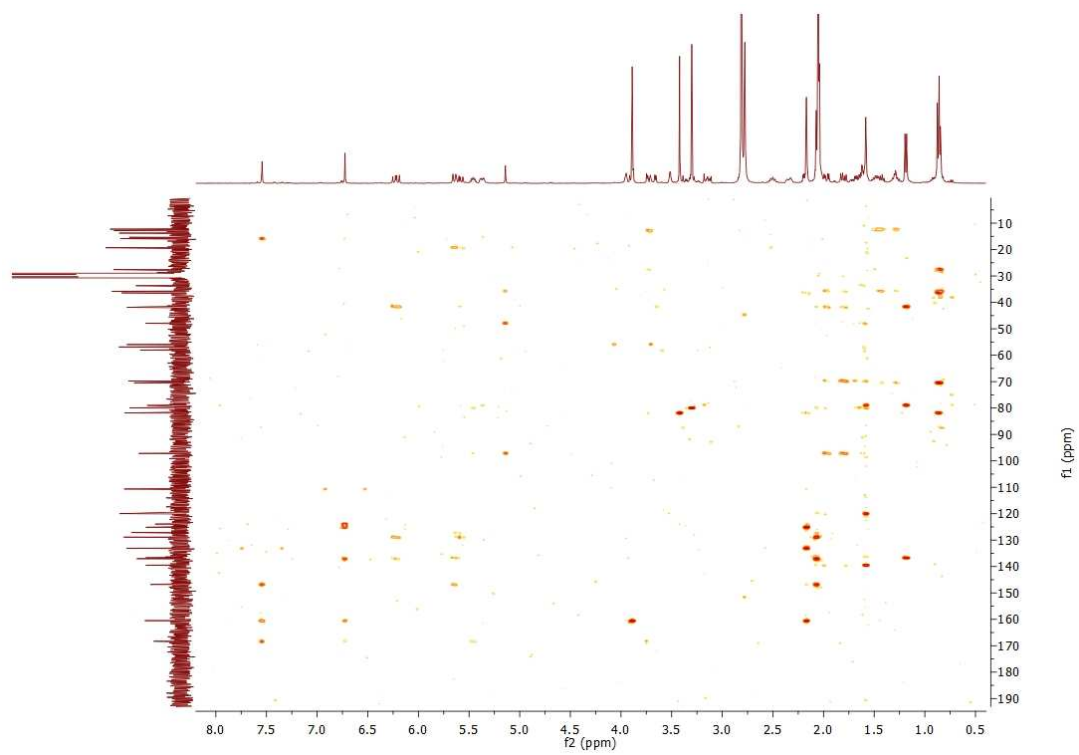

**E**

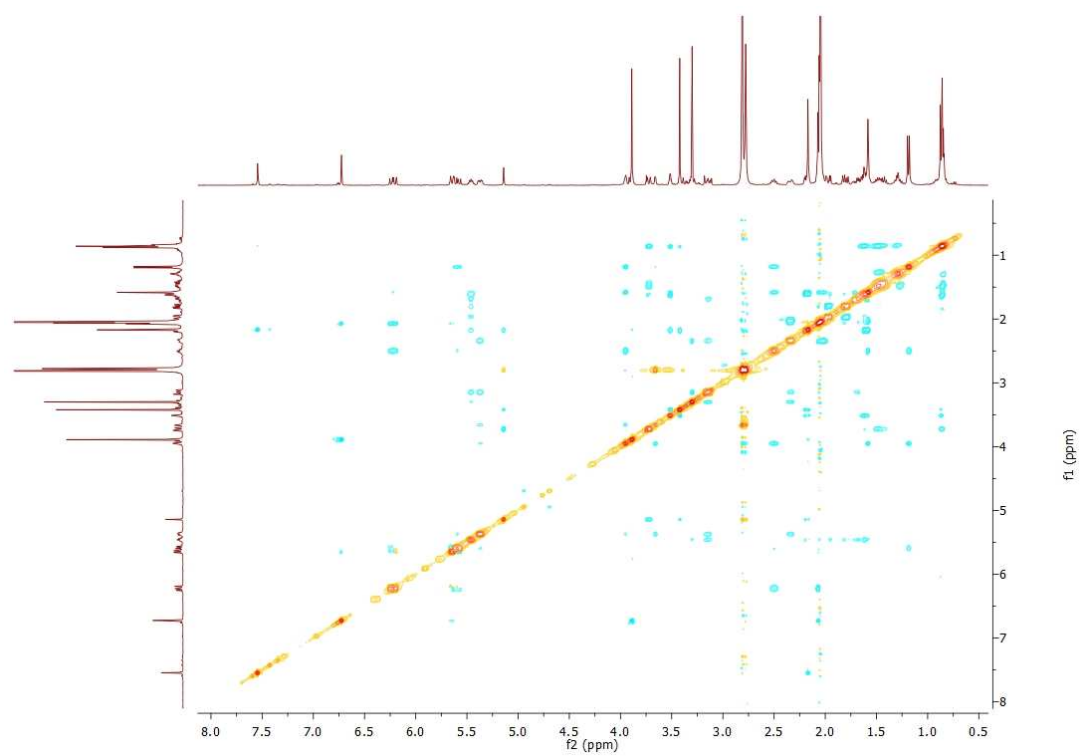

**Fig. S12.** NMR spectra of compound **6**. (A)  $^1\text{H}$  spectrum. (B)  $^{13}\text{C}$  spectrum. (C) HMQC spectrum. (D) HMBC spectrum. (E) NOESY spectrum.

**A**

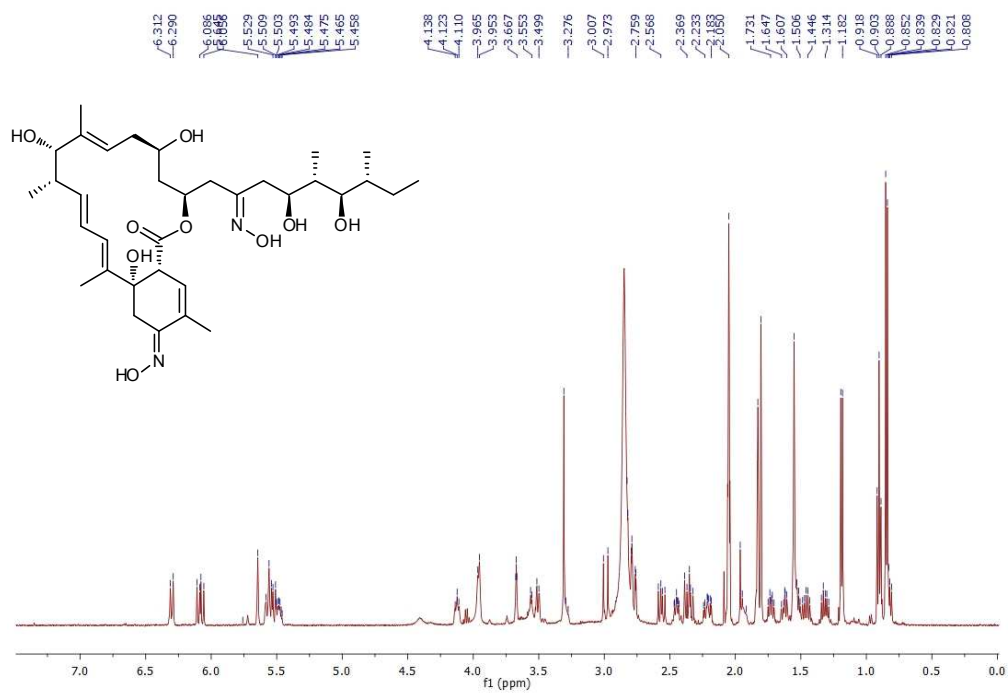

**B**

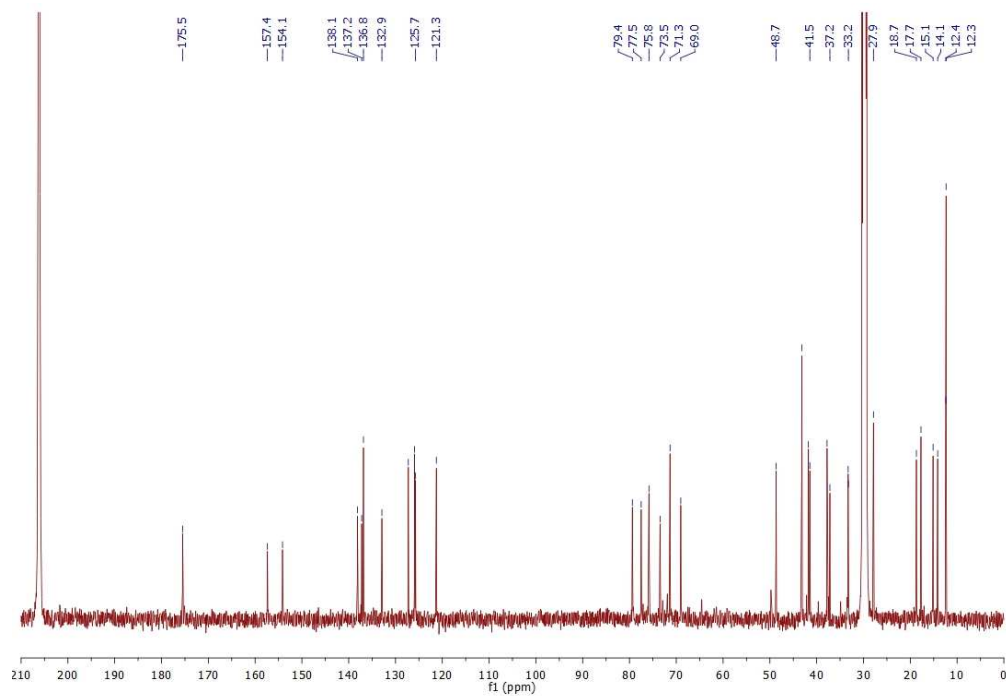

**C**

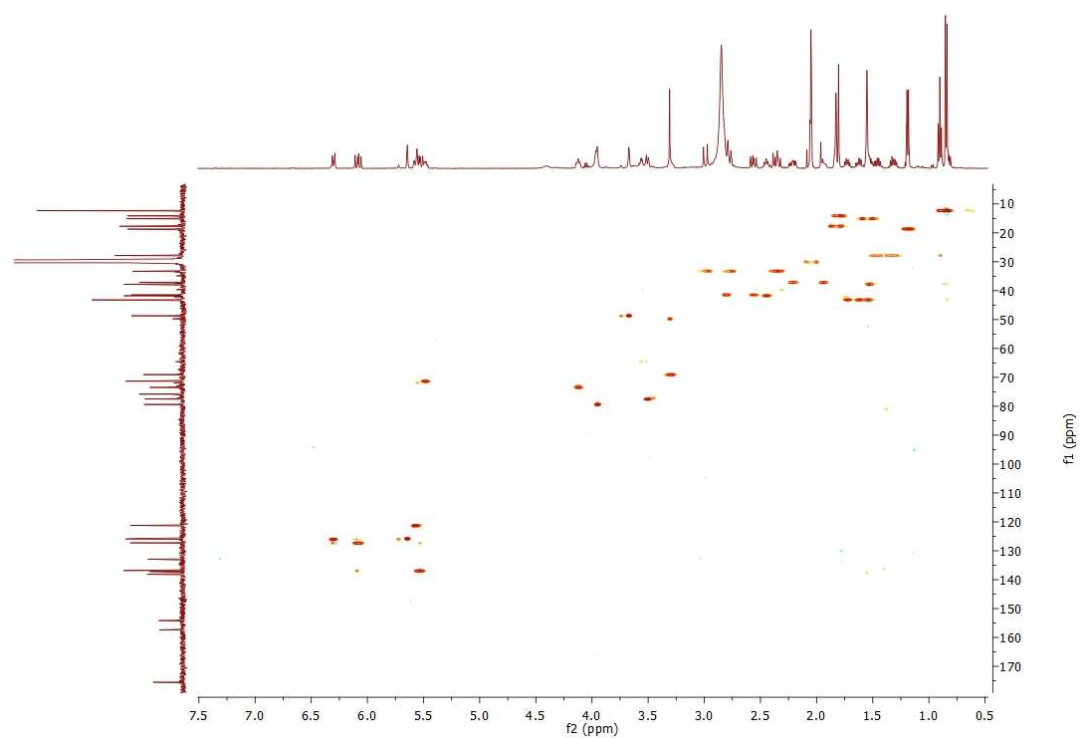

**D**

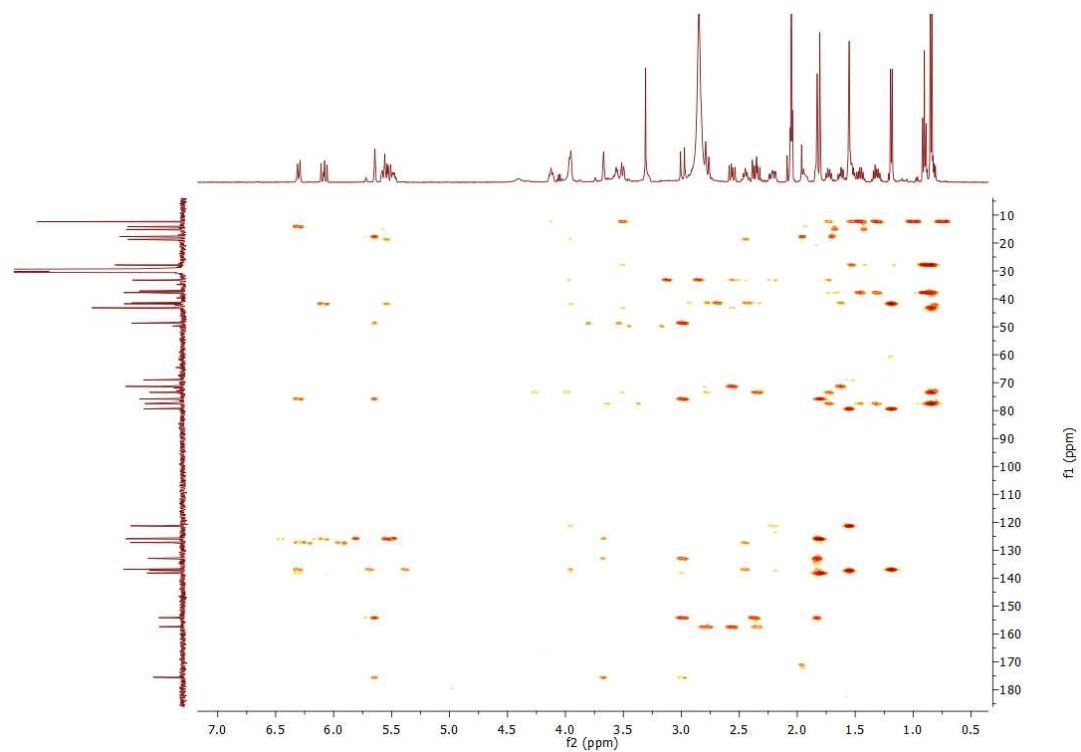

**E**

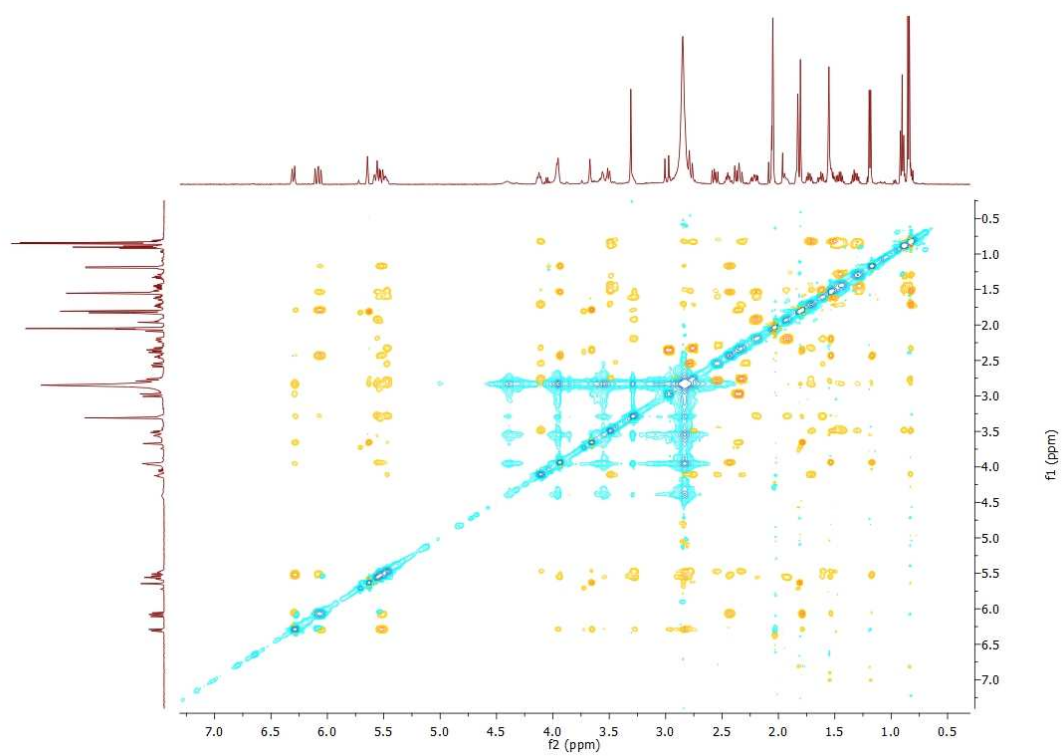



A

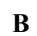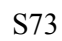

**C**

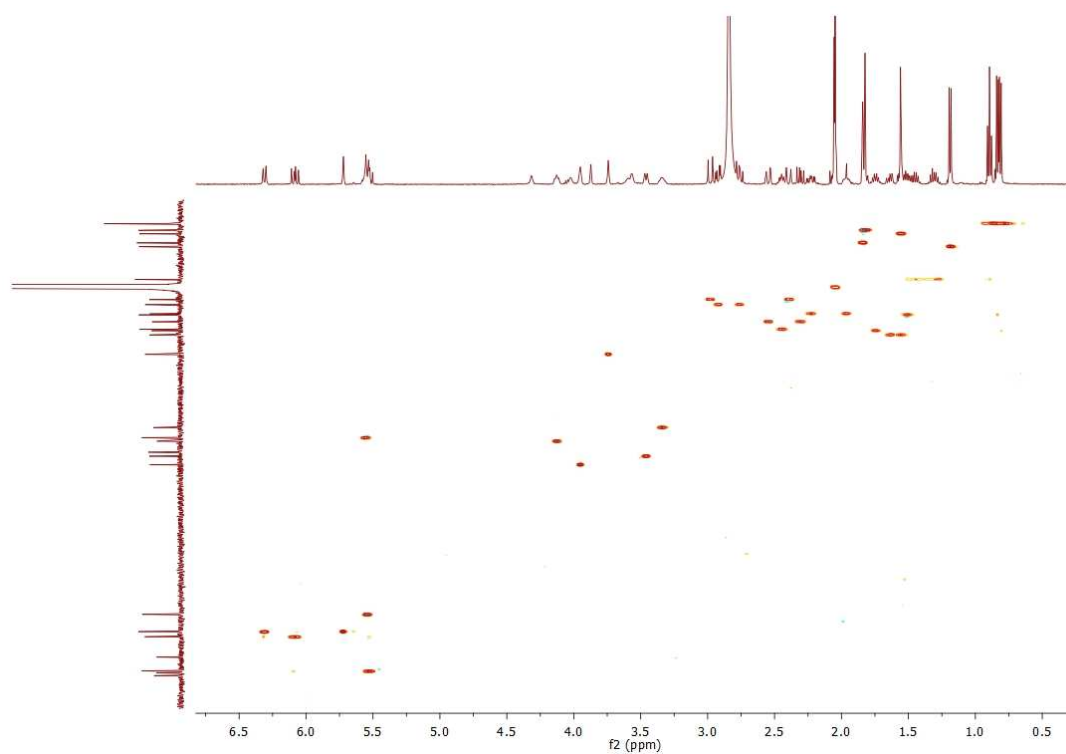

**D**

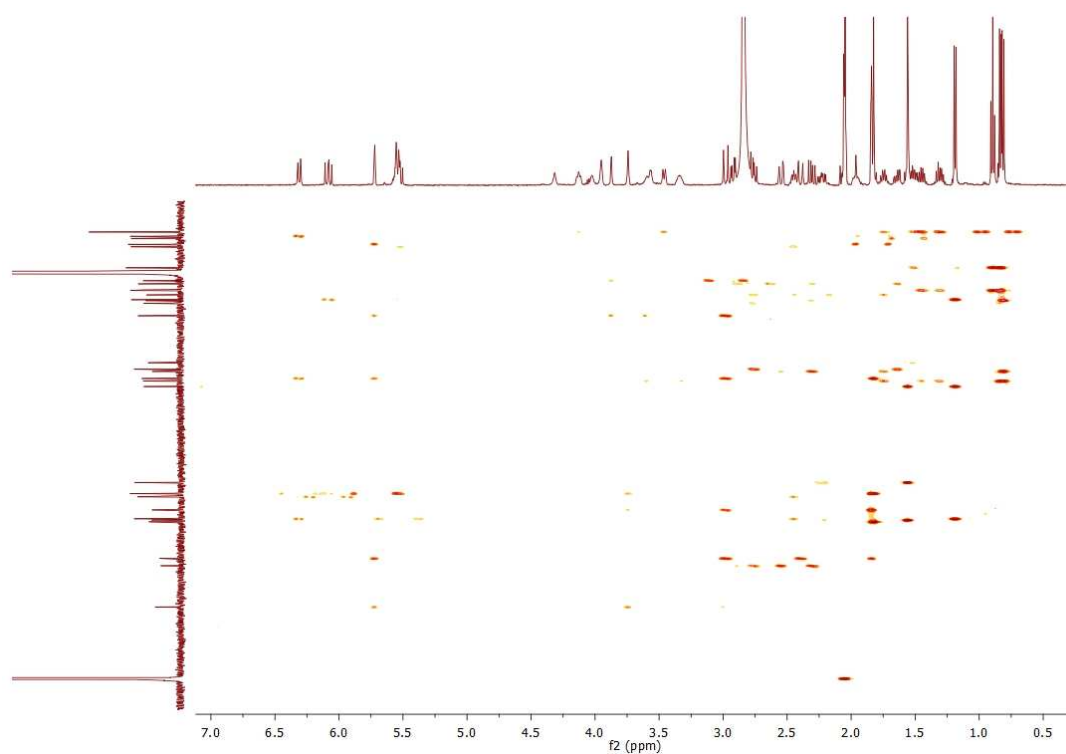

**E**

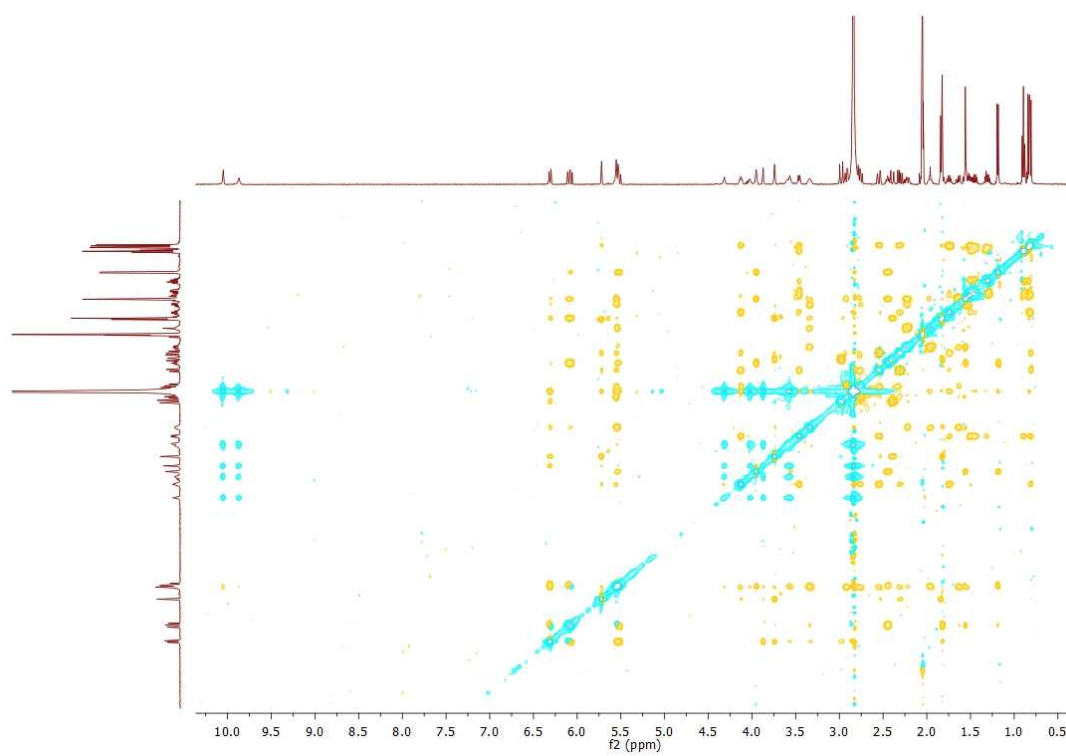

**Fig. S14.** NMR spectra of compound **7**. (A)  $^1\text{H}$  spectrum. (B)  $^{13}\text{C}$  spectrum. (C) HMQC spectrum. (D) HMBC spectrum. (E) NOESY spectrum.

**A**

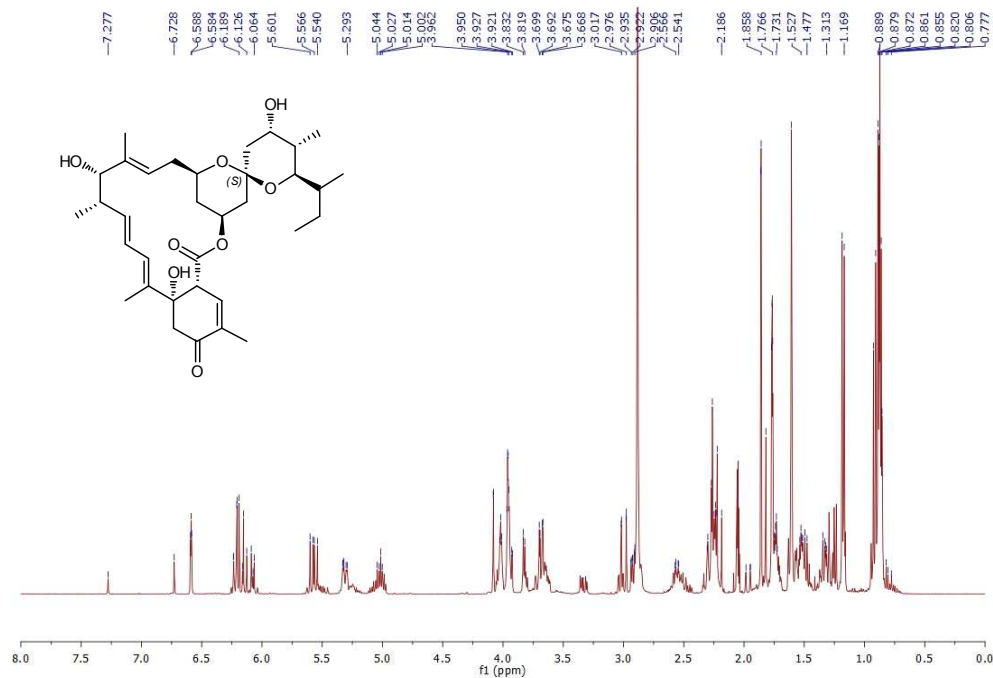

**B**

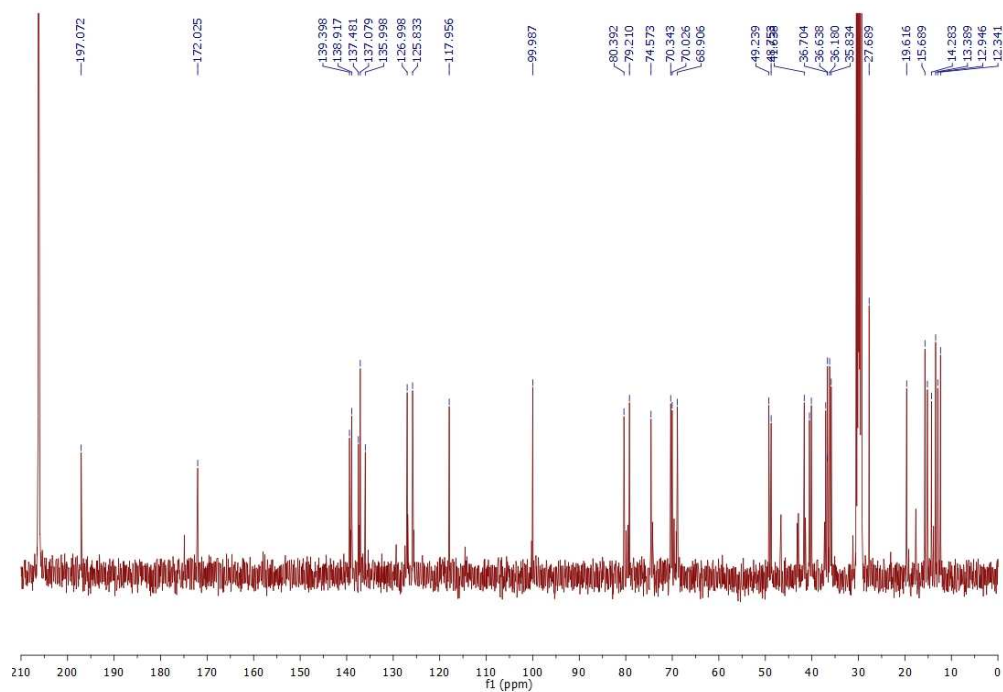

**C**

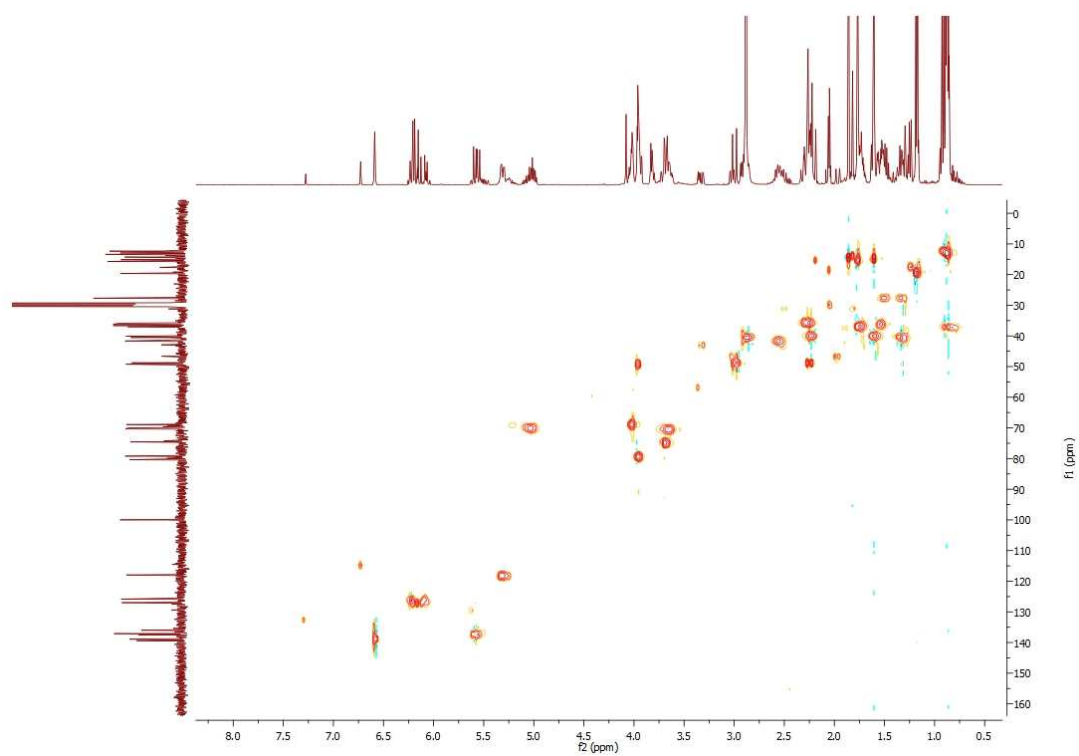

**D**

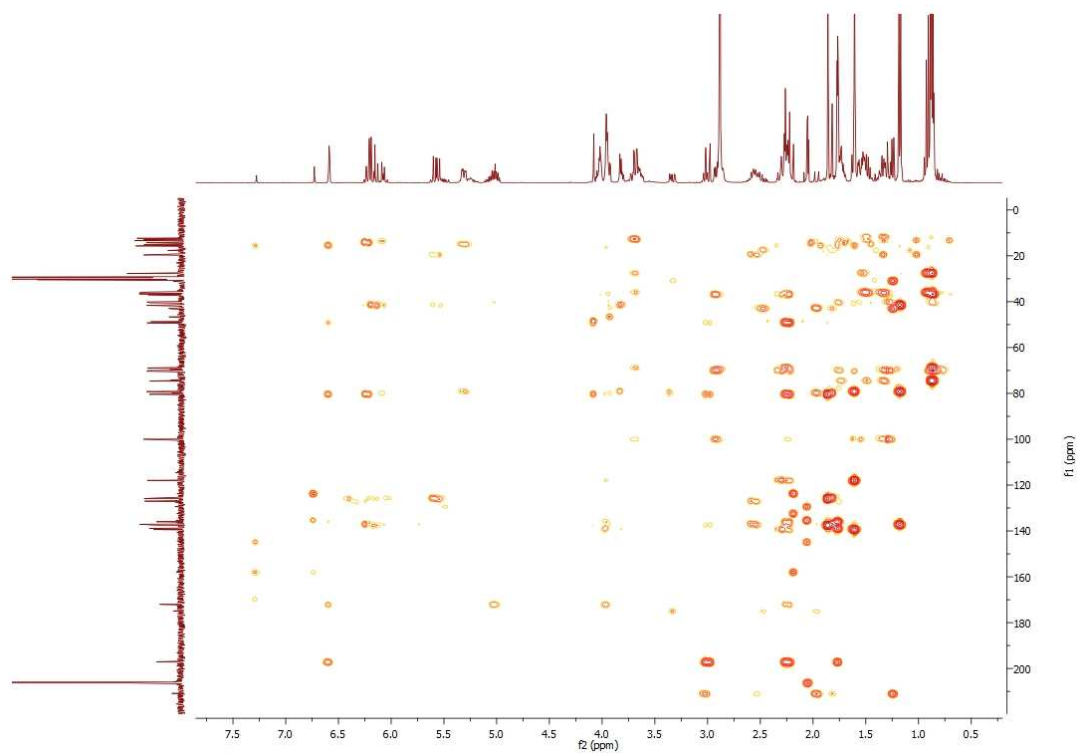

**E**

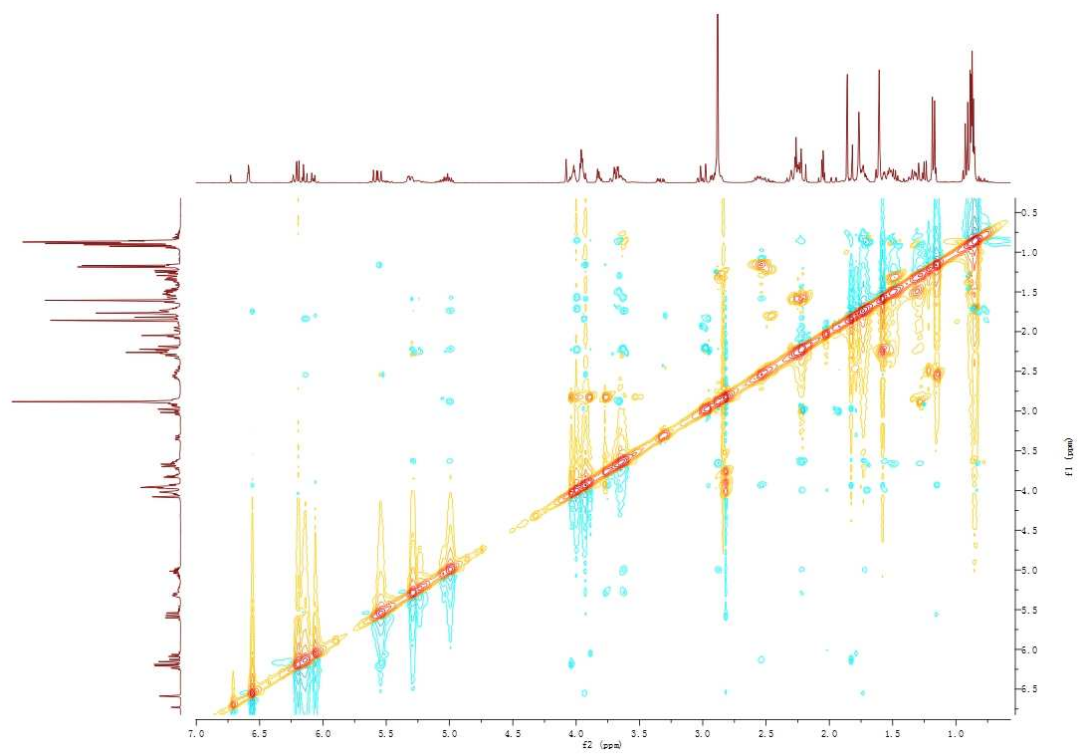

**Fig. S15.** NMR spectra of compound **7'**. (A)  $^1\text{H}$  spectrum. (B)  $^{13}\text{C}$  spectrum. (C) HMQC spectrum. (D) HMBC spectrum. (E) NOESY spectrum.

**A**

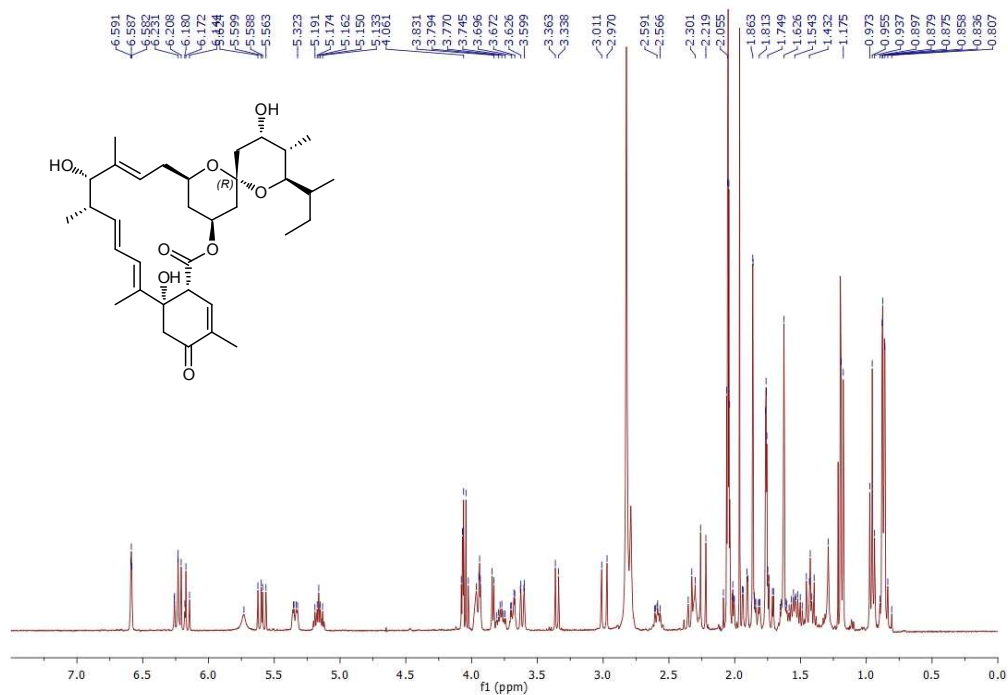

**B**

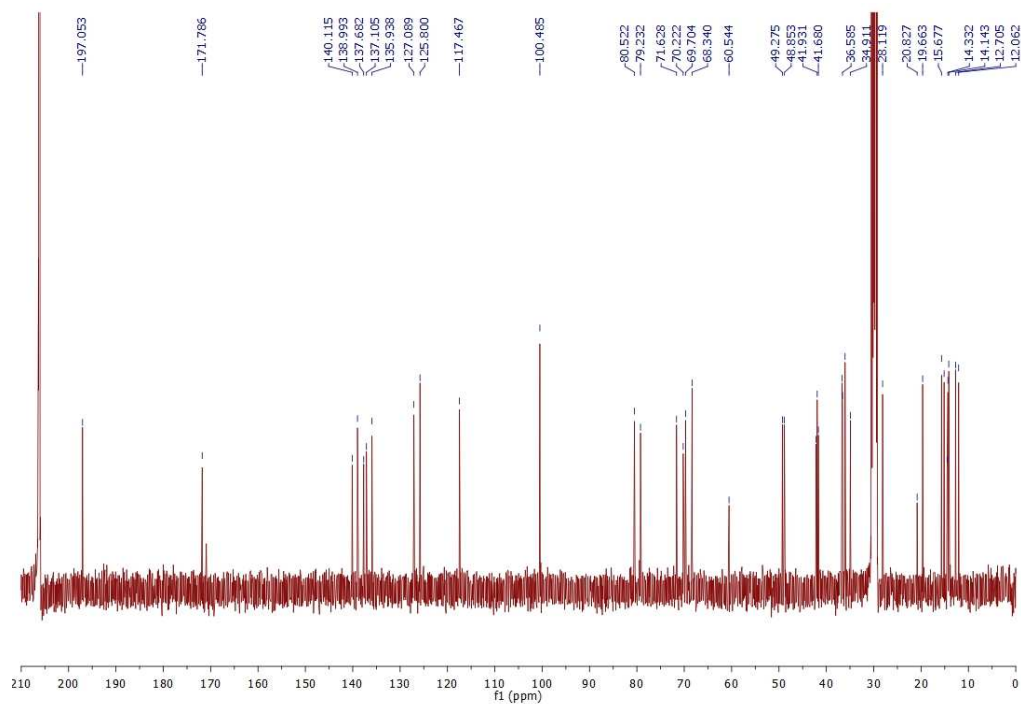

**C**

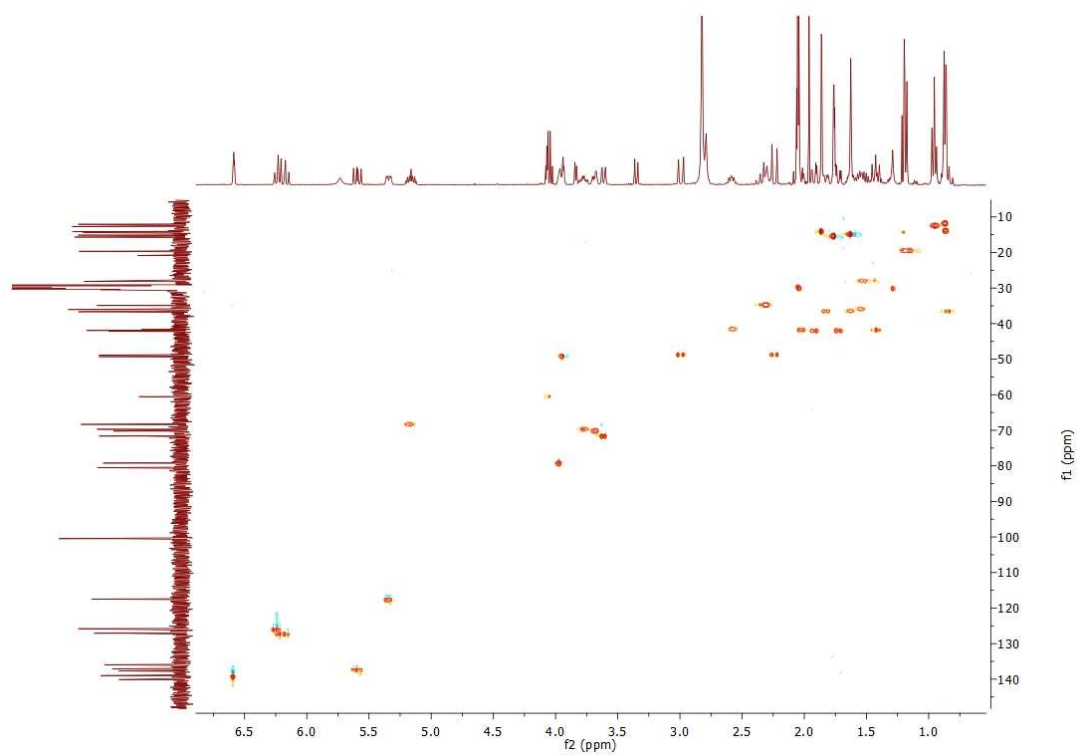

**D**

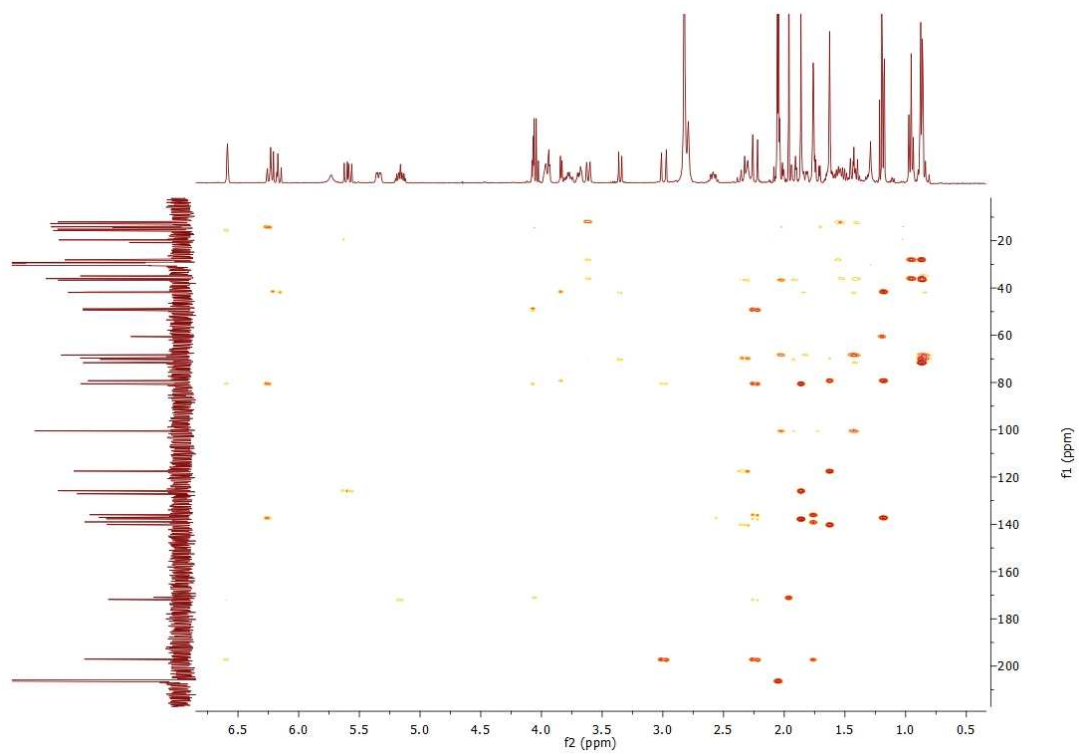



E

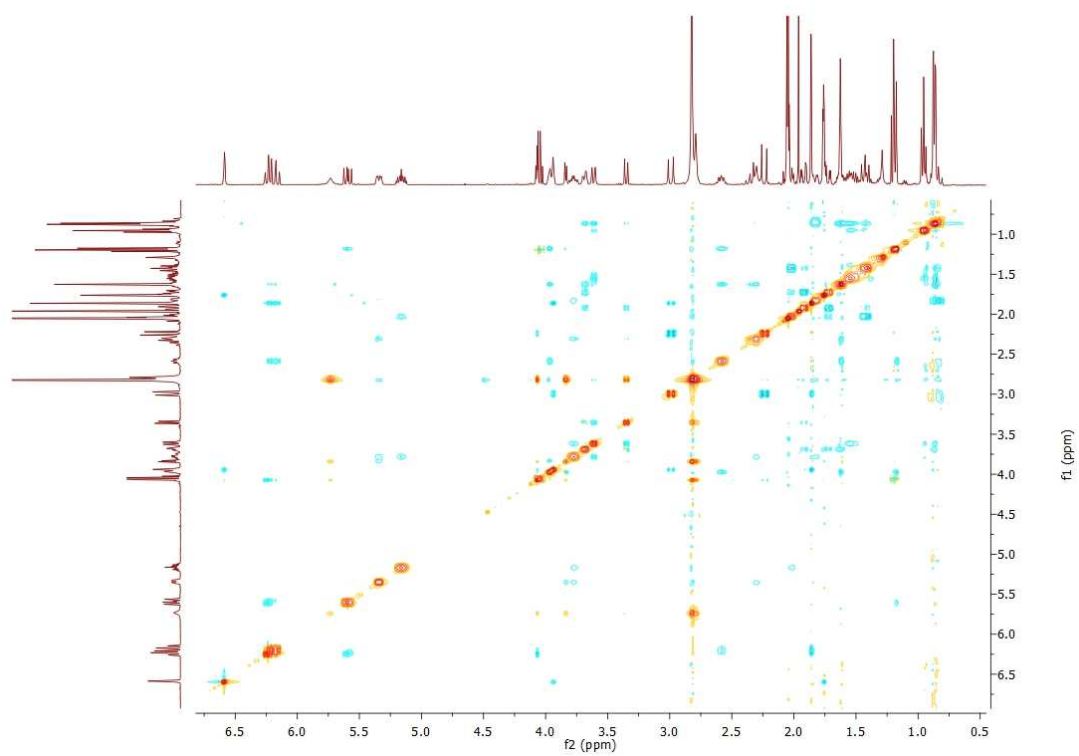

**Fig. S16.** NMR spectra of compound **8**. (A)  $^1\text{H}$  spectrum. (B)  $^{13}\text{C}$  spectrum. (C) HMQC spectrum. (D) NOESY spectrum.

**A**

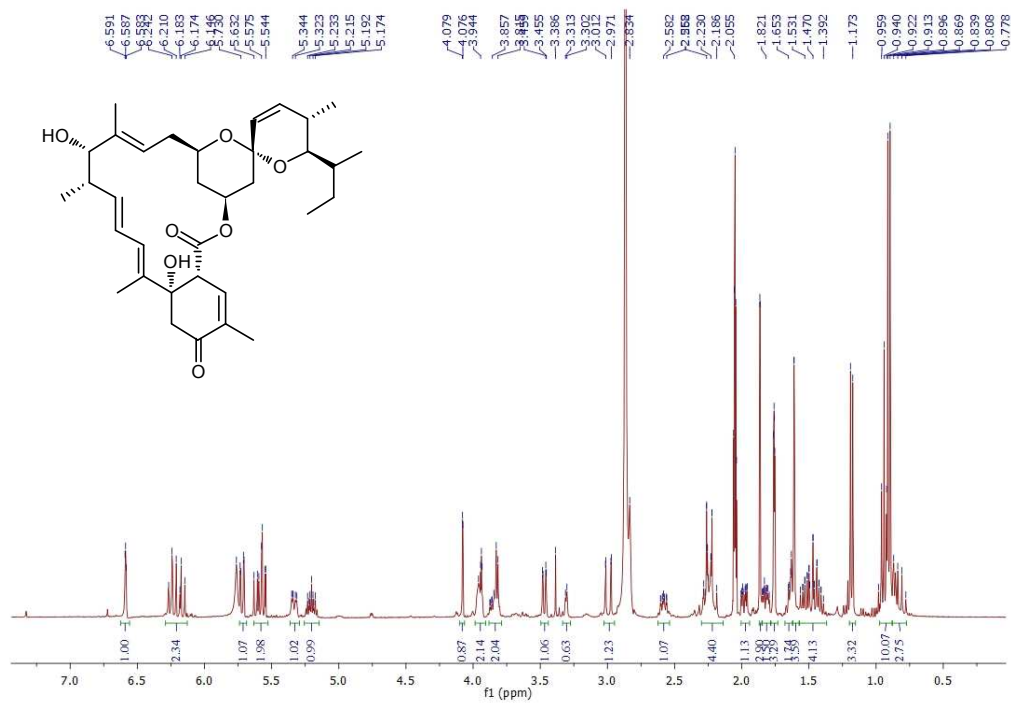

**B**

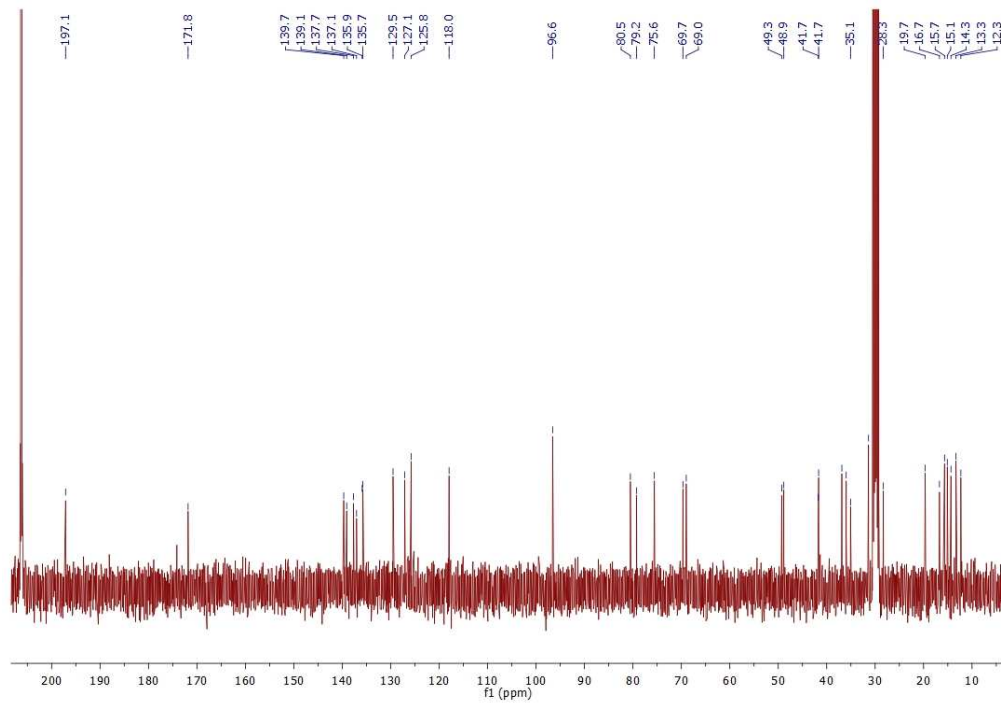

**C**

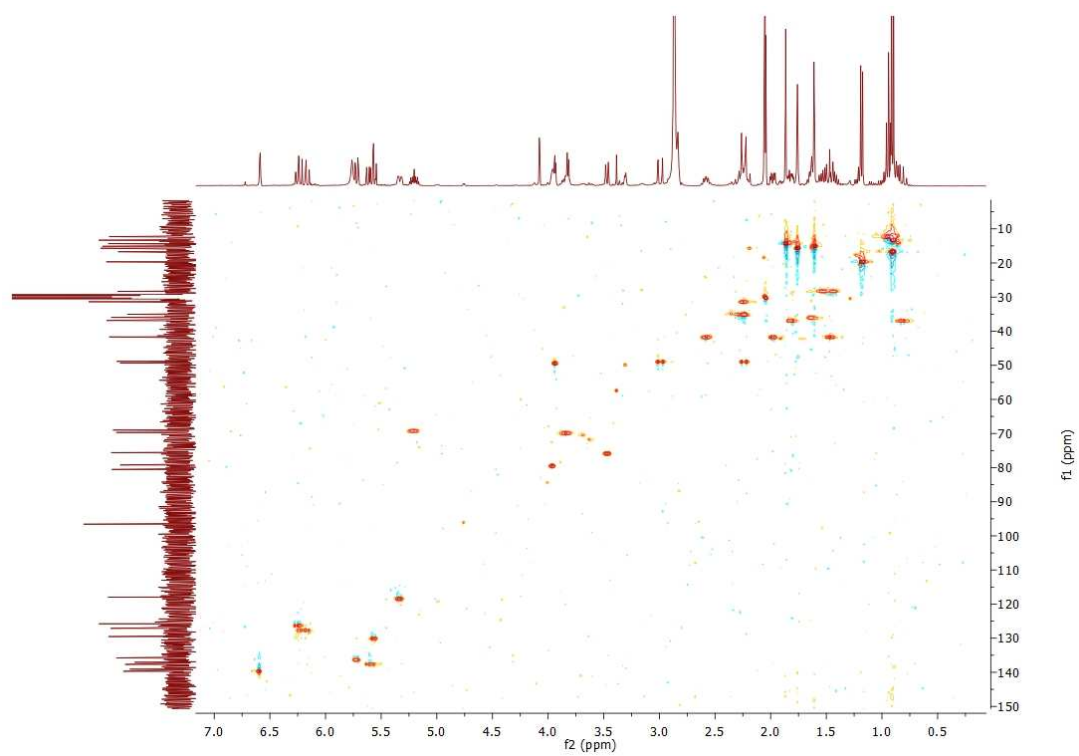

**D**

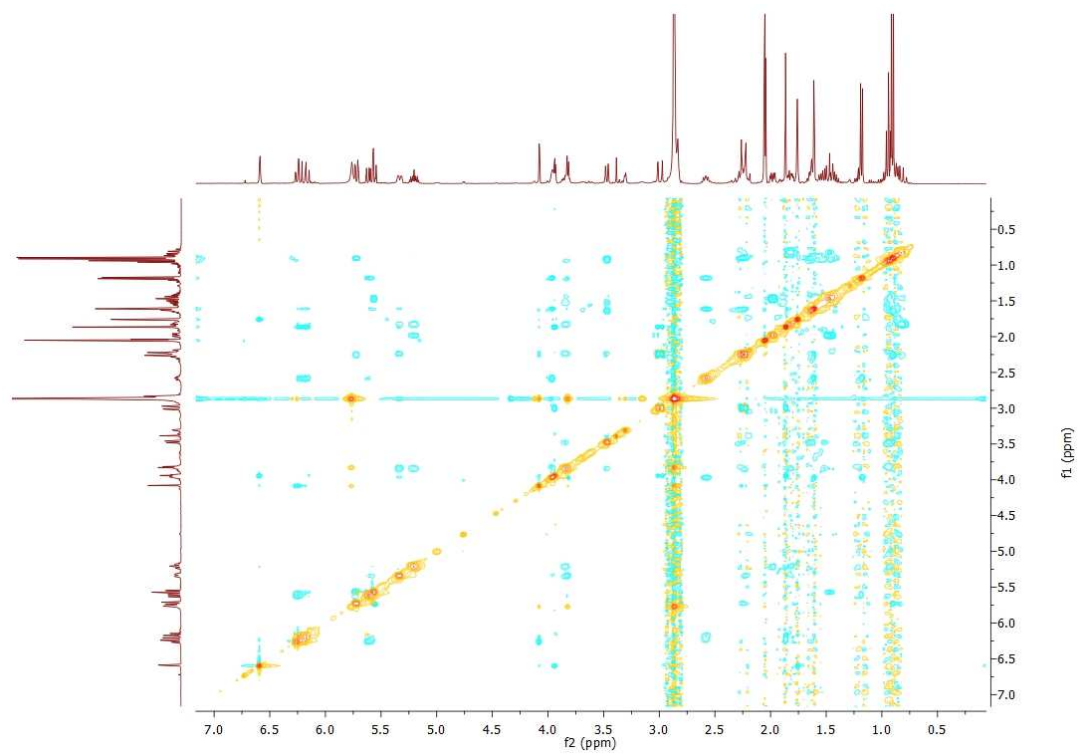

**Fig. S17.** Stereoisomerization between **1** and **1'**. I, 1.0 mg/mL of **1** in MeOH; II, 1.0 mg/mL of **1'** in MeOH; III, 1.0 mg/mL of **1** in MeOH incubated with 1% formic acid (v/v); and IV, 1.0 mg/mL of **1'** in MeOH incubated with 1% formic acid (v/v). The treatment with formic acid was performed at 25 °C for 2 h.

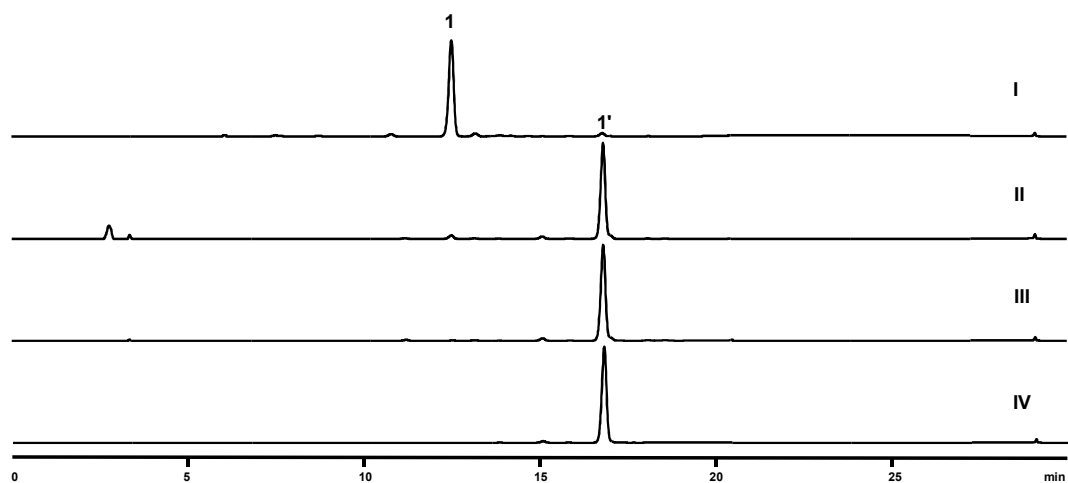

### Supplementary References

- (1) Kieser, T.; Bibb, M. J.; Buttner, M. J.; Chater, K. F.; Hopwood, D. A., *Practical Streptomyces Genetics*. The John Innes Foundation: Colney, Norwich, U.K., 2000.
- (2) R. Blakemore, P.; J. Kocienski, P.; Morley, A.; Muir, K. *J. Chem. Soc. Perkin T. 1* **1999**, 955.
- (3) Tsukamoto, Y.; Sato, K.; Mio, S.; Sugai, S.; Yanai, T.; Kitano, N.; Muramatsu, S.; Nakada, Y.; Ide, J. *Agric. Biol. Chem.* **1991**, *55*, 2615.
- (4) Albers-Schoenberg, G.; Arison, B. H.; Chabala, J. C.; Douglas, A. W.; Eskola, P.; Fisher, M. H.; Lusi, A.; Mrozik, H.; Smith, J. L.; Tolman, R. L. *J. Am. Chem. Soc.* **1981**, *103*, 4216.
- (5) Wang, M.; Yang, X.-H.; Wang, J.-D.; Wang, X.-J.; Chen, Z.-J.; Xiang, W.-S. *J. Antibiot.* **2009**, *62*, 587.
- (6) Pang, C. H.; Matsuzaki, K.; Ikeda, H.; Tanaka, H.; Ōmura, S. *J. Antibiot.* **1995**, *48*, 59.
- (7) Kobayashi, Y.; Tan, C.-H.; Kishi, Y. *Helv. Chim. Acta* **2000**, *83*, 2562.
- (8) Hawkes, G. E.; Herwig, K.; Roberts, J. D. *J. Org. Chem.* **1974**, *39*, 1017.
- (9) (a) Goegelman, R. T.; Gullo, V. P.; Kaplan, L., Novel C-076 compounds. United States Patent 4,373,358: 1983; (b) Chen, T. S.; Inamine, E. S. *Arch. Biochem. Biophys.* **1989**, *270*, 521.
- (10) MacNeil, D. J.; Gewain, K. M.; Ruby, C. L.; Dezeny, G.; Gibbons, P. H.; MacNeil, T. *Gene* **1992**, *111*, 61.
- (11) He, Y.; Sun, Y.; Liu, T.; Zhou, X.; Bai, L.; Deng, Z. *Appl. Environ. Microbiol.* **2010**, *76*, 3283.
- (12) Qu, X.; Pang, B.; Zhang, Z.; Chen, M.; Wu, Z.; Zhao, Q.; Zhang, Q.; Wang, Y.; Liu, Y.; Liu, W. *J. Am. Chem. Soc.* **2012**, *134*, 9038.
- (13) Shen, B.; Hutchinson, C. R. *Proc. Natl. Acad. Sci. USA* **1996**, *93*, 6600.
- (14) Qu, X.; Jiang, N.; Xu, F.; Shao, L.; Tang, G.; Wilkinson, B.; Liu, W. *Mol. BioSyst.* **2011**, *7*, 852.
